# Supplementary material for: A comparative analysis of small RNA sequencing data in tubers of purple potato and its red mutant reveals small RNA regulation in anthocyanin biosynthesis
Source: PeerJ. 2023 May 19;11:e15349. doi: 10.7717/peerj.15349 (PMC10202107; doi:10.7717/peerj.15349)
Supplement: Table S4 [file peerj-11-15349-s004.xlsx]

## Sheet: Sheet1
	Table S4 Total known miRNAs across the six libraries
	miRNA ID	Family	Mature sequence	Hairpin sequence	End positon (mature on hairpin)
	miR8019-3p	miR8019	AAAAGAATGACCTGGTTTGACTTG	TCTTATCTCTTTTACTCCCCTGTTTAAAAAAGAATGACCTGGTTTGACTTGGAACAAAGTTTAAAAAAAGAAAGAAAACTTTTAATCTTGTGGTTCTAAATTAAAGTTATGGCAAATGTACCAAAATGTCTTTTAATCTTGTGGTTTTAAACATGTCACGTGCAAAGTTGAAGTTAAAGTGTTGCCAAAAAAGGAAAGGAGTCATTCTTTCTGAAACAGACTAAAATGAAAATTGGGTCATTCTTTTTGAAACAGGGAGTATCTACTTTCTTATTTTATACTCCATCTGTCCCTAATTAT	51
	miR8013	miR8013	AGAAGAAAATCGCTCCGTCAGAAG	ATCGCTACACGTGGAGCGATTTTCCATTATTTTTTAAGCAGTCCTCGCTTCGGGAATTTTAATAAAAAAAAATTGAACTTTTTTAAGAAAATGGCTGCTATAGTAGCTATTTCTATTTTTTAAATGCTGCTGGGGCAGTGTTGTTAATAAAAAATAATTCACAACAGCGATTTTAAAGAAAAAAGATTATTTTTTTGGACCGGCAGCGATTTTTCTATTTTTTAAAGGAGTAACAGCGTCAATTTTGTCAGAAGAAAATCGCTCCGTCAGAAGCGATTTTGCCCTTTTGGTTAAAAAAAA	273
	miR3627-5p_2	miR3627	TCGCAGGAGAGATGGCACTTAG	CTCAAATAGGAGAGATTGAGGGGATCTTGTCGCAGGAGAGATGGCACTTAGCATTCCTTTTAATTGGTAAAATGCCTAAATGGAACCAATTAAGTGCCTCTGTCTTTCGACACGATGCCCACAATTTCTATTGCATCATACATCAATCATCTACTCAATATACGAGAAGAACATCATCATTTAGGTCAGGATTCATTCAGTTCTTTCTAGCCCCTTCATTATCTGTAGTTCTGTAACTCTTCATTATGTAAGTGCATTTGTAGTTCTCGTTTTATATTGTCATGAATTTGTATTCTAACT	51
	miR845a	miR845	TAGCTCTGATACCAATTGATA	GATTCTCTTTATTGTTCATTTTTTACTACTTAGCTCTGATACCAATTGATATATTAAATAAATATGAAATAGCCATAAGAAATGAAATTCAGTAGCACAACTACAGAAGTAGAAGAACAAAATAAGGAAAACAATTACATAGAAATTTAATGTTAAAATTAACTATATGTAATATGTGTTATATAGATGAATATACATGCGTATTTAGAGAATACTACTACAAAGGAACCTATAGTACTGAGGAATTAAAAGAAATAAGAAAATTGTATTTTACAAAATTACCAGAACCATTTAGTTCAA	51
	miR7980b-3p	miR7980	GAGATGGAATCAGTGTTTGGACAT	GCATTTAGCAATTAGCACTACCTTGTAATGGCTGCCCTAGACAGTGTGAATTGTAATGGTTACTTGTGCCTTGTAAATTGTAATGGCTGCACATTGTAAATTATGTCTTGTGAATTTGTGAGGCTGACTGCTTTTCAGGGCGGGTTGGCAGCTAGTGCCTAGAGCTGGCTGCTTAACTAGTAGCTGCTAAGTATGTGCAGTCTTAGTAGGCGTTTGGCCATGCGATACCATATCACGATATGGAATCGTGAGATGGAATCAGTGTTTGGACATGCGATTTCACACTGATTTGATCTCATG	273
	miR166n	miR166	TCGGACCAGGCTTCATTCCTT	TAATGATAGAAGTAAGGTCTGCGTACGCTTTACGCTCTCTAGATTTTCACTTGTGAGATTATATTGAATATATTGTTATTATTGTTGTTTTCATTTTTACAATATCCTTCTATTTTGTTTTTTGTTCTTATTCTTTAACCTTTTTTTTTTGTGTTTGGTTCTTGATTTATTTTTTTTGTTCTTCAATATCGTCCAACTTATATTTTTACTAGATTTTTTTCTCTTTTTTTTTTTTTTTTTTTAATTTAGTGATACAAATATATAATTAATGGAGTGATCTCGGACCAGGCTTCATTCCTT	300
	miR6027-5p	miR6027	ATGGGTAGCACAAGGATTAATG	TCTTTATTTTTTCATAATTTTACATGATTATGGGTAGCACAAGGATTAATGTGAAACAAATAAGTGATATGTGAAGAACATTGGAGAATTCAAAGAGTTAGTTGTTAGGAAGAAAACACTTTGTGTTTCTCGTGAATCCTTCGGCTATCCATAATCATGTTGAATGTGTGACTTGAAATTTTCTTGTGTTAGTAAATAAAGAAAGCATGGTTTGAGGTAAATGCTAATTTAATCTTTGAGTATGTTCACATATTTGCATTAGTCATATTGTTCGTTAACTTTTTTTGAAGATCCAATCGC	51
	miR166u	miR166	TCTCGGACCAGGCTTCATTC	CTCTAATGATAGAAGTAAGGTCTGCGTACGCTTTACGCTCTCTAGATTTTCACTTGTGAGATTATATTGAATATATTGTTATTATTGTTGTTTTCATTTTTACAATATCCTTCTATTTTGTTTTTTGTTCTTATTCTTTAACCTTTTTTTTTTGTGTTTGGTTCTTGATTTATTTTTTTTGTTCTTCAATATCGTCCAACTTATATTTTTACTAGATTTTTTTCTCTTTTTTTTTTTTTTTTTTTAATTTAGTGATACAAATATATAATTAATGGAGTGATCTCGGACCAGGCTTCATTC	300
	miR6027-3p	miR6027	TGAATCCTTCGGCTATCCATAA	AAACCCTATCTATAAATACCTTGCCTTCAGTCCTCAATCCTTCATCTCACAAAATTAGGGTTCTTTTGCTCTTAGCCGCCACCCCTTTTATTTTTGAATTGAGTTATGTTTATTTAGATTTATGGCAGATAACCTTGAACATGCTTTCTTTATTTTTTCATAATTTTACATGATTATGGGTAGCACAAGGATTAATGTGAAACAAATAAGTGATATGTGAAGAACATTGGAGAATTCAAAGAGTTAGTTGTTAGGAAGAAAACACTTTGTGTTTCTCGTGAATCCTTCGGCTATCCATAA	300
	miR7984c-5p	miR7984	ACGATACCAAACTTTATGAAGGAC	GCTATGATCATTATATTGTTCATTGGTGTAACAACTAAGAATGCACCAAATGGCAATCAGACATTGGCTATGCATGGTCTCATGTAGTCTTGGAATTAAATGACCTTCATTTGATATCAATATTTTATTGTGGCAAGTACCAAAAGATGGGACGTAAATAAACTACCAAAGAAGAAAGAATATTACACACATATAATTGATAGGGATAAATGTCTGAAAAATATCTCAACTTTGGCCGAAATTGCTGTTACGATACCAAACTTTATGAAGGACATATTACCTCCCTGAACTATTTAATAG	273
	miR172b-5p	miR172	GCAGCATCATCAAGATTCACA	GCAGCATCATCAAGATTCACATTTAATTGCATTTTAATGTCGAATATTTGAGAATCTTAATAGTGCTGCATTTGCAAACAACGACTGTGTGTACCAAGAGATATGATGAACAAAATTAAAGCAAACAACAACTCACGATGCCTATGGAGACTAAAAAAATCACCATTTATCATTGAAAAAAAAACAAAATCATAATTGTTGTACACAAAAGTGTTTTTTATTTTTTATAAAACCCTAAATTTAATAAGGTAAATATGTTGAAACACACTACTTTTGCCATCAATTGGAATCATATGACAT	21
	miR172k	miR172	TGAATCTTGATGATGCTGCAT	AAATATTCGACATTAAAATGCAATTAAATGTGAATCTTGATGATGCTGCATTAGCAATAACCGACTAAAGAAACTATTGTCATGGCCCCTGCAAAAGAATGACACAAATTTAATTTTATCGGATGCTTATTTCTCGACTTCCAATCATGGTATGTAATTTCCTATTTCTTCGAGGATTTAAGTTGTATATGTCATGAATATTATTATTGAGAGTGACAATTAATGTTTTATCTTATAAATGATTTGACTGTGTAAATAATTCTTCGAATAATGTAACATTATCATTGTTTCATGTTTTTC	51
	miR477b-5p_1	miR477	ACTCTCCCTCAAAGGCTTCTG	ACTCTCCCTCAAAGGCTTCTGGCTTAAAATGCCTTTTGTGCTAATGCTAGAGGTCTTTCGAGTGAGAGTGAATAAATTCTGCCATGATATATATAATTGCAGAATTATGACTCAACAAAGAAACTGTTCTTCTTCAGGGCTCACGTGAACCTAATAGCCTTATATATGTATTAAGAAATTTATTAAATATCTATTAGTTACAGTAATATTTGACTGTGAAATTCACCTCTTTTCTTTTGCCTTCTGATTCCTATGCAGTTAAGGTGGATCAACGCTGTACAATTGGCGGAAAAGTGCTCT	21
	miR477b	miR477	CTCTCCCTCAAAGGCTTCTG	CTCTCCCTCAAAGGCTTCTGGCTTAAAATGCCTTTTGTGCTAATGCTAGAGGTCTTTCGAGTGAGAGTGAATAAATTCTGCCATGATATATATAATTGCAGAATTATGACTCAACAAAGAAACTGTTCTTCTTCAGGGCTCACGTGAACCTAATAGCCTTATATATGTATTAAGAAATTTATTAAATATCTATTAGTTACAGTAATATTTGACTGTGAAATTCACCTCTTTTCTTTTGCCTTCTGATTCCTATGCAGTTAAGGTGGATCAACGCTGTACAATTGGCGGAAAAGTGCTCTA	20
	miR477a-5p_3	miR477	CCTCTCCCTCAAGGGCTTCTC	AATCACGAGGGGTTGACTTGTGTCTTCAGATGGACACAAAGATTATAATGAGTCTCTGTTATGAATCAAAAGAAGCTGGTTTTGCCACTCATATATATCAAGAGCCAAGATATCAAGGTCCCACTAAATTCCCTTTTTCTATTCTGTAACAAGAGTATTTATTTTTGCCTATAAATAGGCTGCTCTAAATCACTCAATTTGTCAATCAAAACACATTTAATTAAAGATTCTTCAGGGCCCTTATTGCTGCCTCTCCCTCAAGGGCTTCTCTCCTGCATGCTTATATGTTGGGAAAGAAGC	270
	miR477b-3p_2	miR477	GAGGTCTTTCGAGTGAGAGTGA	TGCTCTAAATCACTCAATTTGTCAATCAAAACACATTTAATTAAAGATTCTTCAGGGCCCTTATTGCTGCCTCTCCCTCAAGGGCTTCTCTCCTGCATGCTTATATGTTGGGAAAGAAGCTCTAGCAGGGAGAGCCAATAACAAGTGTCTTGTTTAACAACTTATGTTGCTCTTCACAGTTCACAGGACAGTCTTTTTTCACTCTCCCTCAAAGGCTTCTGGCTTAAAATGCCTTTTGTGCTAATGCTAGAGGTCTTTCGAGTGAGAGTGAATAAATTCTGCCATGATATATATAATTGC	271
	miR477a-3p_4	miR477	GAAGCTCTAGCAGGGAGAGCCA	AATGAGTCTCTGTTATGAATCAAAAGAAGCTGGTTTTGCCACTCATATATATCAAGAGCCAAGATATCAAGGTCCCACTAAATTCCCTTTTTCTATTCTGTAACAAGAGTATTTATTTTTGCCTATAAATAGGCTGCTCTAAATCACTCAATTTGTCAATCAAAACACATTTAATTAAAGATTCTTCAGGGCCCTTATTGCTGCCTCTCCCTCAAGGGCTTCTCTCCTGCATGCTTATATGTTGGGAAAGAAGCTCTAGCAGGGAGAGCCAATAACAAGTGTCTTGTTTAACAACTTATG	271
	miR7983-5p	miR7983	TAAAGTCTTTAGCGACATTGGTTC	CAACCACTAATTTTGTAGTTAAGAGATCTAAAATTTATACATGTACATAAATAAATATAAATAAATAAAATTCTTATTTATATATAGAGGTGTAAGTACTAAGTAGGGTCGGTGTAATTTGCCCTTCTCTAACCATGACTATATTCAATCTGAGACTGGACAACTAATTCACTACATCAAAAATGATCATTAGCAATTGCTGCTAAATATGTATTTTTAACGGCAATTAACACTCTTTGTATATGTCTCTAAAGTCTTTAGCGACATTGGTTCTAATGACACTTAACTAATTCCGGTAAG	273
	miR8016	miR8016	ATTTTTGAATGGAAGGCCCATGTG	TCAACGTTGCATGGTGCCTATAAATTTTTGTTTTGTTCCTTATCCATCTGATATGACACAAAAATGATTATCTTGTATTCAAAGACTACCACCCCAACGTGAAGAATAATTGCAAGACCAATTTTGGTTTTGGGAGTGTGAATCTTGAGCAAATGCTTGCTTGCCTATGTTAGAAAAAGTATAATTTTCATGATAGCAATATGCATGGTCTTTTCTTTCAAAAATATATTATATTAGGAGTTGCTATATATTTTTGAATGGAAGGCCCATGTGTATTTCTTTCATGAAACTTTTTCTCAT	273
	miR172a_5	miR172	TGAATCTTGATGATGCTACAT	TCTGCCTCCACAGCTCATAATTAGTTTAGAGCGGAGGCAGAAGATATTCATCTGAACCCCTTTATATACAAAACCCTATTGGATATTAGAAATCCTTAAAAATCCTAACTCTGTCACTGATAGTTATTTATTGCTGATGCAGCATCATCAAGATTCTCACTTTAAAATAAATAGACATGGTCATGATATATTTTATTTTTCATTTCAATTAAAGCTACATATATAACCTTGCCTCTTAATTTTCATGTATGAATCTTGATGATGCTACATCTGCAAACAACAACTGTTGTTAATTGTTCG	270
	miR172e-3p_1	miR172	GAATCTTGATGATGCTGCAT	ATCATGACCATGTCTATTTATTTTAAAGTGAGAATCTTGATGATGCTGCATCAGCAATAAATAACTATCAGTGACAGAGTTAGGATTTTTAAGGATTTCTAATATCCAATAGGGTTTTGTATATAAAGGGGTTCAGATGAATATCTTCTGCCTCCGCTCTAAACTAATTATGAGCTGTGGAGGCAGAATTTTGAAAAAATCAACATCTATTATATATAGATATAACGATATTTTCTTGACTTTTCCATATCATCCTCTTTGATTTTTTTGGTGAAATGAACCCCTTTCGTCCCTCTAGCT	51
	miR8050-5p	miR8050	AAGTAGGAATCAAGGTCAAT	CTTTAGCAATTTACATCTCTTATCTTGCACCAAGTAGGAATCAAGGTCAATGACATGACACGAAGGCAGGCAGGACACCTTTTCTACTTTTGTTTTGTCAAGTGTTATGTCATTGACTTGAGATTCCTACTTGGTGGAAGATAAGGGATGCAAAAGATAAGTGGATCAACCAACCCGTCCTCATAAAAAAAAAAATTCTCGGAGGAAAGTTTTAACTCTGGAGAGAGCTGTGTTATCATAAAAAAAAGTTCAGTATAAAATGAACAGTGAACTAATCTACTCCCTCCGTTCCAATTTATG	51
	miR171a-5p	miR171	TATTGGCCTGGTTCACTCAGA	TATTGGCCTGGTTCACTCAGACAACAAAATGAAACTATATTTAAATGGTGGAGTTTCTGTTTTCCGTTTGATTGAGCCGTGCCAATATCTCAGTTTCTCTTTCTCTTTCACTTTCTCTAACCTAATATATATATATATAAGTGCAGGTAATTCGTCATGCATTACCATCTAGGGTTTGTTCCTCTAATTTATAATTGCATCATTAATGGGTTGTGGTGTGGTCAGATGAATAAAATTTCTCCGAGGTCTCTGGCTTAGGTTCAATTCCTGAAAAATAAGAATAAAAATTCATGGAATTTG	21
	miR8050-3p	miR8050	TGACTTGAGATTCCTACTTGG	CTACTTTTGTTTTGTCAAGTGTTATGTCATTGACTTGAGATTCCTACTTGGTGGAAGATAAGGGATGCAAAAGATAAGTGGATCAACCAACCCGTCCTCATAAAAAAAAAAATTCTCGGAGGAAAGTTTTAACTCTGGAGAGAGCTGTGTTATCATAAAAAAAAGTTCAGTATAAAATGAACAGTGAACTAATCTACTCCCTCCGTTCCAATTTATGTGAGTTAGTTTGACTTGTCTTGAAGTTTAAGAAAAAAAGACTCTTCAAACTCGTGGTTTAAAATAAGTTATATATTTGTGTGA	51
	miR7985	miR7985	CGGGCTTGCCTAGAACGGGTTACC	TTGCCTTCTGGGTCGAGCTCGTCGCACCGGGCTTGCCTAGAACGGGTTACCTCTCCTATGTGGTTTGCGAGCTATTGCATAGGAGCGGGGGTTTTACCCTGTGCGCACCCAAAGGGTAGCGGCTGCGGGTTTCCCTCATCATCAAAAAAATAAATATATGTTTGAGTAAGAACATATCAGCAATAGAAGTGAGCTCTAGGAAAGTGGTGAATGGTTGTATGAAGTAGAATAAGCACCTAGATTCATTCTGATTCTTCTATGCTCATTCAACAAGTAGGAAACTTACAAGCTAGTGCGACG	51
	miR2111a-5p	miR2111	TAATCTGCATCCTGAGGTTTA	CATATAGGAGTATATATTTATATTATTATTATTATACCAACCTTATACTTGACATAATTTTATTATATGGATACTTTATTGAGGCACTATAAATTATTGCTTCTCATGCTTAATTTGTTCATCAACACTTCTCACAAGGAACTAGTTTAGCTATTTCCTCTCTTTACTTCCTTTCTTTCTTAAATTCCTCTTGTTTTGAATATCATCGTTATTATTATTAGTATCATTAATACTGTGTTAGGCTAATGGTAATCTGCATCCTGAGGTTTAGATCAATTTCTAATTTACTGAATCTAGTCC	270
	miR7984d-3p	miR7984	CAATTTCGGTCAAAGTTCGGATAT	CATGCTCAAAGTTTGAGATTGTTACAGCAATTTCGGTCAAAGTTCGGATATATTTCATACCTTTTTCCCCAAAAAAATGCTTTTGTTATTTATATTCCGCAATTTACTTCTTGTTTTGTGACCGAATAATTCGATTCTTTCAGCATAGTAGATATAGCAAAAATAACAAATAGAAAGTCATAAAACATAAAATAAAGGAATCATGAGTCGATAATTTCCATGATTATTTTGTTGCATCTTCCTTGTTTATATCGGTCTCTGTCGAACCACTTAAATGTAAAAGAAGAAATTAAACTTAAT	51
	miR8024a-3p	miR8024	TTGGAGGATTTGAAGATTTCAACT	TGGATCTAAAAACTTTAACTTTCAAACTTGGAGGATTTGAAGATTTCAACTCGCATACTCGAAGAATTTGAAGACTTCAACTTGCATATTTGGAAGATTTAAAGACTTTATTGAAGACTTGAAGATTTTGAAGACTTCAACTTGCAGACTTGAAGGATTTGAAGACTTCAACTTGCATACTTGAAGATTTTGAAGACTTCAACTTGCATCCTTGGAAGATTTAAAGACTTCAACTTGCAGACTTGATAAATTTGAAGGTTTGAACTTTCATACTTGAAGGATTTGAAGAATTCAACTTGC	51
	miR8037	miR8037	ATAATTTGGAGGAATAGGAACC	TCTCCAGACCGGAGTGCATAGAAACGACCATAATTTGGAGGAATAGGAACCGTACTATTAGGAGAAGCTTGTTTGGCAACTCTTCCTTTTGTCGAGAGTGTAGGGCAATCTTTCACTTGATGATTACTCTTTCCACAACCATAACACTCATTCGTACCGGCTAGGCACTTCCCATAATGCTTCTTTCCACAATTGGTGCAAGTAGGTTTAGGAAATGGAGGCCCACTACCTTTCTCTTGGTTAACCCTAGGAGTGCTTGAAGAATCTTGGTTAGAAGATCTCTTGTTGAACCTTGGTTGA	51
	miR319f_1	miR319	ATTGGACTGAAGGGAGCTCC	ACACACACTAAAAAGAAACAAAAAGAGAGAAATGTTGTTCCACTAGTAAGTTTTTTCTTCTGTTTTCCATCCGTTCTCCGGAGTCCACATTCTCAACTAGTAAGTTAAGAATGTGTAGATTTAAGTAGGAGCTCCTTTCAGGCCAAGACCGAGGGACGAGGAGCGGCATGAGCTGCCTAGTCATGCATATTGGTTAACCTTAACAAACATATATATAGAGTGTTAAGAATAACCAGTTGCATGCCAAGGGAGCAACTACTTCCGCTAACTTGTCTCACTTATTGGACTGAAGGGAGCTCC	300
	miR319-5p	miR319	AGGAAACTGTTTAGTCCAACC	ATGTAAATATAAAGGGGACAATAATAACGATTAAACAAAGAGATTAGGCAGACGCACTTTATGATATGAAATGAGACACGGAAAGTATTCCTCAAATTCCTGTAACAACATGTGAAAACACTGCTTCTTAGTATTTTTTATTTCTTTAAATTTCGTGTTCAATTAAACAATTCGGGAGGAAACTATTATTATTATTATATATAAAAGGGCTCCTCCTGTGACTAGCTACTTGAGAAAGCTGAGGAGAGAAGGAAACTGTTTAGTCCAACCCAAGGTGGGTTATTGGAACTGATCTTTGCT	270
	miR159a_1	miR159	TTTGGATTGAAGGGAGCTCTA	AACTTGATGTTTTATGATAGGTTTTAGGACAAGATTAGGGTTTTTGTACATGTTGACTTGATATATTTTGTGTTATTATTAGTTGTTATGGGAGTGGAGCTCCTTGAAGTCCAACAGAAGATCTAACAGGTTAGATTGAGCTGCTGACCTATGGATTCCTCAGCCCTATCTATTTATGATTTAACATATAGATAGCTTTGTGGGTTTGCATATGTCAGGAGCTTTATTTTACCTTTTGTTTGATCATTTTTTGGATTGAAGGGAGCTCTACATTCGTATCTCCTTGCTAGATTTGTACAT	270
	miR1446a	miR1446	TTCTGAACTCTCTCCCTCAA	AGGCTGCAATCATTAGTGGAAATCCAGCGTTTTCTGAACTCTCTCCCTCAATGGCTGCTCTTATTAATTAAAGAGCAGCCGTGAGTGATTGAGTTCAGAAAACTCTGGCTTTCCTAATTTTGAAGAGTTCAACGCTGAATTTCAGATCATGAATCCACTAGCTAGCGCCAGGCCAGAAGCTACAGTTCCTTATACATAGTATTTTCTTTTGTTTTTTGCAGTATCACTTTTTATATAATCTTCTTCTTATCAAGCAGCTACTGGATATAAGAGTGGCTTTTGAAGAGTTTTCACATCAAC	51
	miR319-3p	miR319	TTGGACTGAAGGGTTCCCTTC	GTTCAATTAAACAATTCGGGAGGAAACTATTATTATTATTATATATAAAAGGGCTCCTCCTGTGACTAGCTACTTGAGAAAGCTGAGGAGAGAAGGAAACTGTTTAGTCCAACCCAAGGTGGGTTATTGGAACTGATCTTTGCTGCTGAATCATTGGCTCATGAGCATGTCAAAGAAGATGAATAACATCCTGGACATGTTCTTGCTCCAATGATGCAGGAGCTGAGCTCGGTTTTTCACTGCCTTTTCTTGGACTGAAGGGTTCCCTTCCCTTCTCTCTAGTCACAGTAAAAATCACCA	270
	miR156a	miR156	TGACAGAAGATAGAGAGCAC	ACTATTACTCTTTATTTGGTCTCATATTTTCTTTCTATAAATAGGCCCCTCCACAAATTATACTTATAAAATAATAATGTCCTCAGCCCAAATTAAAACTTGCCCTCTATCTGTATGAAACACCAACCACTCTTTCTTCTTCTCTTCCAAGTTTTTGCTGTATTAATTAACACTGTTTATAGGGTAATTGAATGTGTGAAACGGCAGAGGAGGAGAAAGAAGAGGGAAAAATGGAGTGGGTGATATTGTTGACAGAAGATAGAGAGCACATATGATGAAATGCTGCTGCTGCTAAATCTG	269
	miR10542	miR10542	TAGAAGAATCATATATACCCCTA	AAAGATTAAAATATACCTTGAACTTTGCTAGAAGAATCATATATACCCCTAAATAATTTAAAAAAATTAAAAGTCAAAATATAAATTTAAACTAACTTTTTCACTTCCATTAAATGAAGGGTATATGTGAGCTCATTTTGTAACGGTAGGGGTATATGTGAGCCGTTTGTATAACGGTAAGGGTATATATGAGCCACTTTCATAACGAGGAGCATATCAGCTCCAAATGACAAAGTTGAGGGGTATATCAAACCCTTTTCCCATGAACCAATGATGGAAGAGTCAGCATTCTGAAAAATA	51
	miR156c	miR156	TTGACAGAAGAGAGAGAGCAC	AGTTCAATCCATTGACATATAGGAATCGTCAAATGGATCTTTGGAAAGCTGGATTTCCTGAAAGCTATCACCACTGTGACCATTCGCAACCAAAGTATGAATGTGTGGATTGAATAGATGTTGTTTCAGCTTGCCAGTGTTCAGTGGACTCAAATGGCAAACTCTGAGGAATTGCATGCATCACCTGCTCCGGTATGATGATCTGGTTTACATGCGTTGAGTGGCCAATTGAAATAAATTCATTCTCATTTGACAGAAGAGAGAGAGCACGAGGTAATTCTGGCGCCACACCCATATTTA	270
	miR5532	miR5532	ATGGAATATATGACAAAGGTGG	ATCCGCTGCCGAATTTATTCCAATTCCAAGAGCTCGGATCGAATCGGTATTGATATACCGATTCGATTTGATCTCTCTTATTGAGAATGCTCATTTAATAAGAATTCTCAATATTATTCCTTGAACAAGACTTGAACCTCCACACTCTTTAGCACTTGATTTTGAGTCTCGCGTGTCTACCATTTCACCACCAAGACATCTTGAAAGTCAATCGTATTCTATGAATATGATATCTATCTAGTGTGATGTATGGAATATATGACAAAGGTGGATCTATTGATCGGTCATGTCATATAGTCC	271
	miR394-3p	miR394	AGGTGGGCATACTGTCAACA	TAAATAGTGCTCAACTGCCCCTCTTTTGAAACTATATTATTATTATTATTATTATGAGTACAAAAATTAAATAGTGAGTATTGCAGATTATTGAGAGACTACAATCTTGATTTTCATGAAGATTTCTCAAAGGGTTCCTTACATAGTTCTTTGGCATTCTGTCCACCTCCAATTAGCTTCATGATCTTCTATATTTTTTTAGAAAATTATAATTTATTATTTAGAAAAAAAAAATAAGAAAAAAAATGGAGGTGGGCATACTGTCAACAGATTTGTGTTGGTTTCTCTTTGTGAAATCTT	269
	miR394a_1	miR394	TTGGCATTCTGTCCACCTCC	TTGGCATTCTGTCCACCTCCAATTAGCTTCATGATCTTCTATATTTTTTTAGAAAATTATAATTTATTATTTAGAAAAAAAAAATAAGAAAAAAAATGGAGGTGGGCATACTGTCAACAGATTTGTGTTGGTTTCTCTTTGTGAAATCTTCTTGATATTAATTGAACAACAGATTTTGTGTTGATAGTGATGATGATGATGATGGCCCTTTAGTTTTTTTGGAAATCCCAAAAAGGTAATAAAAAGACAAATCTTTATATTGTTTGGATTTATTAGTTTTCTTCAATTTGATTTTTTTCT	20
	miR827	miR827	TTAGATGAACATCAACAAACA	TTATTCAAGCTCTTGTGTAAATATAGGTATATACAACAATAACATATCCATTGAAATCCCACAAATGGAATCTGGGGAGGGTAGAATGTACACAGACCTTGTCACTATCTTGTGGAGGTAGATGTGTTGTTTCTAAAAGGCCCTCGACTTAGATGGAGCAATTCCATGTATATATAGGTATATATATGCTAAAATTGTGTAGTTATGAATTTGTTTGTTGATGGTCATCTATTCATCATATCATTTGGCATAGTTTTTGCAACCATTAATATGCCATGATTAGATGAACATCAACAAACA	300
	miR168a-3p	miR168	CCCGCCTTGCATCAACTGAAT	TTCTCTATAAAATCACCTTACAATATCTAACAAGTCTCTCACTTTCTCTCTCTAGCTATTTATAGGGAGAGTAGGTTTTTCCTTTCTCTCTCTAAAAATCTCAGATCTATATATGTACAGAATAGATACAGAAAGTTTGTATTTCTGTTGCGGCGGCCTCTCATTCGCTTGGTGCAGGTCGGGACCTACCTCGCCGGCAACAATGGCGGTAGCTGACGGCGACGGCAGCTTACCGGTAAAAACTATTTTTTTACATGTTGTCTGTGGCGTAGTTTGGGTCCCGCCTTGCATCAACTGAAT	300
	miR168-3p	miR168	TCCCGCCTTGCATCAACTGAAT	TTCTCTATAAAATCACCTTACAATATCTAACAAGTCTCTCACTTTCTCTCTCTAGCTATTTATAGGGAGAGTAGGTTTTTCCTTTCTCTCTCTAAAAATCTCAGATCTATATATGTACAGAATAGATACAGAAAGTTTGTATTTCTGTTGCGGCGGCCTCTCATTCGCTTGGTGCAGGTCGGGACCTACCTCGCCGGCAACAATGGCGGTAGCTGACGGCGACGGCAGCTTACCGGTAAAAACTATTTTTTTACATGTTGTCTGTGGCGTAGTTTGGGTCCCGCCTTGCATCAACTGAAT	300
	miR827-5p_3	miR827	TTTGTTGATGGTCATCTATTC	ATATGCTAAAATTGTGTAGTTATGAATTTGTTTGTTGATGGTCATCTATTCATCATATCATTTGGCATAGTTTTTGCAACCATTAATATGCCATGATTAGATGAACATCAACAAACATCTTCATCACTTCATGTTAATCCCAAGATTATTTGATCATTAACTATTACTGTCGATGTGTTTGTGCCGACTTGTGTGCACCTTAACTAATTTCACTGGTTATTGAATATTTGTTTCCTTCCACCAGCATCGCATAACTCAAGCTTGTATTATTTTTTTCTTATATCTTAGTAAAAGGTCGTG	51
	miR7992-3p	miR7992	TGTCTAGATGTGCATTTCAAAGT	TACGGGGCCAACTTAAACCAAATTATGGTGTCTAGATGTGCATTTCAAAGTTGGGGTGTTCAATTGTCAGTTCAGACCAAGTTAAGGTGTCTATCTATGTATTATGCCAAGTTTAAAGCTTACGAATACTGAAATAGATATGTCGTGCTTTTTTTTCCTTTCATGTTTACCAAGCCTTATTCCTATCCTTAGTGATGCAAGATTTTGGTTAGCTTTATCACACTTGAAATGTTGTTTGCTTGCTTCACTAACTTATGTGATGCACTCTTGGCAGGGTTTGGTAGCAGCAGCATATGCATT	51
	miR7992-5p	miR7992	TTTGACAATGCACATCTAGACACT	TCAACTGGCAACTAAAAATGCCCTAACTTTGACAATGCACATCTAGACACTTAACTTGGTTTAAGTTGGCCTCATAAACACCCAAATTTGAGAATGCACATCCAGAAAAGTGTGTTTACGGGGCCAACTTAAACCAAATTATGGTGTCTAGATGTGCATTTCAAAGTTGGGGTGTTCAATTGTCAGTTCAGACCAAGTTAAGGTGTCTATCTATGTATTATGCCAAGTTTAAAGCTTACGAATACTGAAATAGATATGTCGTGCTTTTTTTTCCTTTCATGTTTACCAAGCCTTATTCCT	51
	miR10540	miR10540	ATAATAACTATTAGTTGAATG	GCAAAACAAATCTTTAAAAAAAAAAGAAAAAAAATCTCTTTAGTTTTTATAAGACATACAACAAAACATAGGATAAGCTTACTATTTTTGAATTCTCTTATTAGGGAAACTATACATGATTTAAAGTTACAAATAATATGATAAAATAAGGGTTGATTTCTCAATTTTTACAATTTATAATTATTATCTCGGAAATTCATTATTTTTCTTGATTCTCATTTTTTCAACAAAAAAAGTAATTTTTTTGAGATAATAACTATTAGTTGAATGATCATCTAAGAAAATTCAACTCAATTAAAT	270
	miR1886a	miR1886	ATGGTATCGTGAGATGAAATCAGC	CTTGTGTGAAATCAACAATTATAACTTCGGTGAAAATGGTTGTGGCAATGACGGCTTAGAGATGGTGAAATGTGAATGGTGGAGGAATTTGGTCTTTGTTGCTATGGAGAAGAAAGATAATAAATAAGAAAAAAAACATATATTTGTAAAAAGAGATATTAAAAATAAAATTTTAATATTTGCCTTTTGTACTCACTCTCTTAGACTCTTTCTAAGTAGGCGTTTGGCCATGAGATATCATATCACGATATGGTATCGTGAGATGAAATCAGCGTTTGGACATGCGATTTTACGCTGATT	273
	miR391	miR391	ACGCAGGAGAGATGATGCTGGA	AAAATAGGAAAAGTATCAAAAGGCTTGCTACGCAGGAGAGATGATGCTGGACGATAGAGATATGAGAATATTAAAGGGGCTTTAATTTATTGGCCAGCATCATACTCCTGCATATTAAGCCTAAAAATGATGCTATTATAAATTACCCTGATGGTTATACATACTTCACATATTTCAGCTGACAGTCCTACTTGTTTTTTTGACAGGTTTAGAAGGAGGCAGATGACAGACTTGAATCGTCGCTTCGGGAGATATGGGTATTGAAAAATCTTAACTACTTGTGGCGGTGAGGGGACCCAT	51
	miR391-5p	miR391	TACGCAGGAGAGATGATGCTG	ACAAAATAGGAAAAGTATCAAAAGGCTTGCTACGCAGGAGAGATGATGCTGGACGATAGAGATATGAGAATATTAAAGGGGCTTTAATTTATTGGCCAGCATCATACTCCTGCATATTAAGCCTAAAAATGATGCTATTATAAATTACCCTGATGGTTATACATACTTCACATATTTCAGCTGACAGTCCTACTTGTTTTTTTGACAGGTTTAGAAGGAGGCAGATGACAGACTTGAATCGTCGCTTCGGGAGATATGGGTATTGAAAAATCTTAACTACTTGTGGCGGTGAGGGGACCC	51
	miR391-3p_2	miR391	GCATCATACTCCTGCATATT	CTATCCTAGTACTACCCGTCCCTACTACAAACTGATTCAAACGCCACAAAAGACAATAGATACAAGATGACAAAAAGGATAAATAGTTCCAACATTGACAATTTGTACATTCCAATATTTCTTGATTAATAATTATAAGAAAGAAGAAATATAGAGAGAGTTGAGTTTATATTGAGGAATGAACAAAATAGGAAAAGTATCAAAAGGCTTGCTACGCAGGAGAGATGATGCTGGACGATAGAGATATGAGAATATTAAAGGGGCTTTAATTTATTGGCCAGCATCATACTCCTGCATATT	300
	miR5303e	miR5303	TTTTGGAGAATCTGACACGGGTGT	GTGTCAGACACTCCAGAAGTAGTGTATTTTTGGAGAATCTGACACGGGTGTGGCATCAAAAGTGAAGAGTCTGTGCAACTTACTGAACACACCACATCTCCATTTCCACGATTCATATCCTGGAAGAAAGATGGATTTGTATTATCTATCTGATTTTGATCAAAGTTTCTGTCCCTTTTTGTGATCCTGGGTTGGCTATTCCATTGTTTGTGGCAACCTTGGCAATTTCCTTTTTGCCAGAGATGAAAGAAAAGGACACCATAGAAGGACAAATTACAAAGAGTAAAAGAAGTAAAAAGA	51
	miR156	miR156	CTGACAGAAGAGAGTGAGCAC	AGGAAGGAGGGGGGACAGAGAGAATCAAGACTGACAGAAGAGAGTGAGCACACGCAGTCGAATTGTATAAACATTTATACAATTGTCATTTGCGTGTGCTCACTTCTCATTCTGTCAGCTCTCTCAGAATTTAAGTTTCTCCTCTTTCTTTCTTTTTTCGTTTCCACCACCTACATGAGATGTTGAAAGGGTTCAAATAAATCTCGTTTTAAAAATTTATATATAGCAAACGTTGAATTCTCTTTGATGTTATCTGCCACTCATAGCTACTACTTCCATCACTTATAGCTATTCTTTAAA	51
	miR319a-5p	miR319	AGAGCTTTCTTCGGTCCACAC	AGAGCTTTCTTCGGTCCACACATGGGGGGCGATAGGGTTCAATTTGCTGCCGACTCATTCATCCAAATGTTGAGGTCTTGATAGTCGAATGCCACCTCAGCAACTGAGTGAATGAAGCGGGAGTACAAGTTGAGTCTTGAGCTTCCTGTACTTGGACTGAAGGGAGCTCCCTCTTACCTTTTTTCATATCGATTATTTTACCGAGTACCTAATATTTATTCGACAAATTAAACATATATAGTATTGGTCATGCATGATTTAATTAACTTGCTAGGGTTAAATATACACTTGAAATTTTCT	21
	miR319c_2	miR319	CTTGGACTGAAGGGAGCTCCC	TTGTGTTATAGGGTTAAGTTTTTATAGTATTAAGTGGAACGAAGTGTATCTGATTGAGGCGTAATAATTATTGTTATCTGATTGGATATATATATGAAGAGAGCTTTCTTCGGTCCACACATGGGGGGCGATAGGGTTCAATTTGCTGCCGACTCATTCATCCAAATGTTGAGGTCTTGATAGTCGAATGCCACCTCAGCAACTGAGTGAATGAAGCGGGAGTACAAGTTGAGTCTTGAGCTTCCTGTACTTGGACTGAAGGGAGCTCCCTCTTACCTTTTTTCATATCGATTATTTTAC	270
	miR319a	miR319	CTTGGACTGAAGGGAGCTCC	TTGTAGTTCAAAGTATGACTTCATGATATTATTTTTTTTATTTTCTTTGCATCTAATTAAAATTTTCTTCTTCTATTTAGGGCATATGGAGAAAATAAGGAGCTCTCTCCGGTCCAGTCCGAGGCAGTCGAAGGTTAAAAACACAGCTGACGACTCGTTGATTCTCAAGCACGTCAACAAACATTTTTAGAAATTGACGTGTTTGAGATTCAACGATGCGTGAGCTATGTTTAGCTAGAGTTGTCACGTCTTGGACTGAAGGGAGCTCCCTATTATATATCCACTACCCCTTAATTTTTC	269
	miR6025a	miR6025	TACCAACAATTGAGATAACATC	TTGGATATTTTCTTTGCCTAATTCTGGTATACCAACAATTGAGATAACATCTAGGTTTGATGATCTTTTGATTAGCTAATTGTATAGTTATCACCTGTACACTTGCACAAAATTATTATTGAACCTTGATGTTATCTCAGTGTTGGCATGCATAAATTGGGTAAATTTATGATTGAATGTGTATTCTGGTGTTGTACCAAATCCAGGCATGCCAATTATTGAGATGGCATCTCGGTCTGTTAGTTGCTGTGCAGTATGATCACTGTGGCAGGATCTGTGTGTTATGCAATAGTAAGTCAT	51
	miR319_1	miR319	TTGGACTGAAGGGAGCTCC	TGTAGTTCAAAGTATGACTTCATGATATTATTTTTTTTATTTTCTTTGCATCTAATTAAAATTTTCTTCTTCTATTTAGGGCATATGGAGAAAATAAGGAGCTCTCTCCGGTCCAGTCCGAGGCAGTCGAAGGTTAAAAACACAGCTGACGACTCGTTGATTCTCAAGCACGTCAACAAACATTTTTAGAAATTGACGTGTTTGAGATTCAACGATGCGTGAGCTATGTTTAGCTAGAGTTGTCACGTCTTGGACTGAAGGGAGCTCCCTATTATATATCCACTACCCCTTAATTTTTCA	268
	miR6025d	miR6025	AACAATTGAGATAACATCTAGG	ATATTTTCTTTGCCTAATTCTGGTATACCAACAATTGAGATAACATCTAGGTTTGATGATCTTTTGATTAGCTAATTGTATAGTTATCACCTGTACACTTGCACAAAATTATTATTGAACCTTGATGTTATCTCAGTGTTGGCATGCATAAATTGGGTAAATTTATGATTGAATGTGTATTCTGGTGTTGTACCAAATCCAGGCATGCCAATTATTGAGATGGCATCTCGGTCTGTTAGTTGCTGTGCAGTATGATCACTGTGGCAGGATCTGTGTGTTATGCAATAGTAAGTCATATTC	51
	miR6147	miR6147	TGACATCTTCAAAACCCACTA	TGACATCTTCAAAACCCACTATGAGCTTCATTATGAGCTATGAAATGGTGAGTTTTGATGATGTCATGCCTAAAATAGGATTAATGAAAGTATTAGTAAAAAGGTGTTCAAATCTGGAGGTTATGTTAAGCTGGTGGTATGCTTTGACTGGGAAAGATGACTTAGGTCAAAATAAATATATCCAGATCTGGCACAATCTTGTGTTTGCTAATGGTGAGATTACTATACTCAGTGAAATAATGATGAATTAGTATAGTAGCTAAGTCTTAATGATGAATTAGCAGCTAACTTTTATTGTAA	21
	miR5300	miR5300	TCCCCAGTCCAGGCATTCCAAC	TCCCCAGTCCAGGCATTCCAACAGTTGATAACATCTAGATCTGCCAATCCTTTGTATTTTTGTTCTTCTGTTTTTCACATGACATCTTCAAAACCCACTATGAGCTTCATTATGAGCTATGAAATGGTGAGTTTTGATGATGTCATGCCTAAAATAGGATTAATGAAAGTATTAGTAAAAAGGTGTTCAAATCTGGAGGTTATGTTAAGCTGGTGGTATGCTTTGACTGGGAAAGATGACTTAGGTCAAAATAAATATATCCAGATCTGGCACAATCTTGTGTTTGCTAATGGTGAGATT	22
	miR319a_1	miR319	TTGGACTGAAGGGAGCTCCCT	ATCTATGTTATGTTTATAGAGTTATGAATCCCCTCTTTTTTAGATTCTAATTTTGTGATTGAATTTGTTTATTTAAATGTAATGTGAAAGATGATATAAGAGAGCTTCCTTTAGTCCACTCATAGGTAGACGAAGGATTTGAATTATCTCCCGACTCATTCATTCAAACACAATAGGAAGTATGTATTCTTATACTATTGTGAATGCGTGAATGATGCGGGAGATAAATTCTTTCCTTTTTATCTGTGCTTGGACTGAAGGGAGCTCCCTTTTACCTTCTTTTTTCATTTTCTTTTAATC	270
	miR8032a-5p	miR8032	TGGTCGGCATGACTCCCGAGGT	TCCAGAAGGGTCATTTTAGGCTAGTAGCTTGGTCGGCATGACTCCCGAGGTTTTCAGTGTGAGTCGGTGCCATTAGGCGTTTTAGCCTTTGAAATTTGGCCTAAGGTTGACTTTGGTCAAAATTCATGGAAAACGTGCTTGGTTGAAAATTTTGTCAGCACGGTTAGCTCCGAAATGTTGAGTTTGGTCTAGAACGACCTTTCGTTCGACTCCCGAGGCCTCCGGACTCATTCCAAGCCCTCGGTGAATTTTGGTTAAAATGGCACTTGGGTGTGGGACCCACTTTTTGTCAAGATGACT	51
	miR7984d-5p	miR7984	ATCCGAACTTTGACCGAAATTGCT	AGTCACATAAATTGGGACAGAAGGAGTATTAAATTGAATTGGTAAAATTATTGGGTTGACTTACCTTTTGTTTGGGAACATAGATGTCATCATAACTTGTGATTTTGGATCGTGACACTTCTGGAGACTGAGGGTGAGCTGATGGCGTCCTAGTTTGACTCAACTCTATATGTATATAGTTTTTGTCTAGACTTTTGTATTCAAGACAAATTTATATATATTTTATTTAGGGAAATTGGTTTGAAATATATCCGAACTTTGACCGAAATTGCTGTAACAATACCAAACTTTGGAAATGAC	273
	miR164a_4	miR164	TGGAGAAGCAGGGCACGTGCA	CTCTTTACTTTAATTCTGTCTATATTTTTATTTATTCATCACCCCACCCCCTCTCCCACCACACCCTCACATCTTTTTCCAGCTATAAATACTTGAGCTACCCCAAACTTCTTATTTGTCACCTCAAGTTCAAAAATGAACAATTCCCTCACACAATGCAAGAAAATACCTTCTTTATTTTTGGTTGTTGAAATTGTAGAGTTGGTACTTTTATGGAAATATTGGCAATAATGGGTGGGTAGCTCATGTTGGAGAAGCAGGGCACGTGCAAATTCTTGTATTCGACGATATACGCATTAC	270
	miR164e-5p	miR164	TGGAGAAGCAGGGCACGTGCAA	CTCTTTACTTTAATTCTGTCTATATTTTTATTTATTCATCACCCCACCCCCTCTCCCACCACACCCTCACATCTTTTTCCAGCTATAAATACTTGAGCTACCCCAAACTTCTTATTTGTCACCTCAAGTTCAAAAATGAACAATTCCCTCACACAATGCAAGAAAATACCTTCTTTATTTTTGGTTGTTGAAATTGTAGAGTTGGTACTTTTATGGAAATATTGGCAATAATGGGTGGGTAGCTCATGTTGGAGAAGCAGGGCACGTGCAAATTCTTGTATTCGACGATATACGCATTAC	271
	miR164b	miR164	TGGAGAAGCAGGGCACGTGC	CTCTTTACTTTAATTCTGTCTATATTTTTATTTATTCATCACCCCACCCCCTCTCCCACCACACCCTCACATCTTTTTCCAGCTATAAATACTTGAGCTACCCCAAACTTCTTATTTGTCACCTCAAGTTCAAAAATGAACAATTCCCTCACACAATGCAAGAAAATACCTTCTTTATTTTTGGTTGTTGAAATTGTAGAGTTGGTACTTTTATGGAAATATTGGCAATAATGGGTGGGTAGCTCATGTTGGAGAAGCAGGGCACGTGCAAATTCTTGTATTCGACGATATACGCATTAC	269
	miR7984c-3p	miR7984	CCTTCATAAAGTTTGGTATCGTAA	CTATTAAATAGTGCAGGGGTAAAAGGTCCTTCATAAAGTTTGGTATCGTAACAACAATTTCGGCCAAAGTTGGAGTATTTTTCAGACCCTTTTCCCTTTTTTTTTTACTTTGAAAAGAATTAATTTTTATAAGGATAAAATGAAAATTAATTAATTAATTAATTCTATATTGATTTTATAAATTAACAAGTAATTTGAACATACATTTTAATAACGCGAATATGAGTATATTTTGCGTTGAAATCAGAGAAATAAGTGTAGTGCGCACCCCGTTAATTGAAACAACTTTAGTATGTGAAC	51
	miR8033-3p	miR8033	TCAATTCTGCAGCTTTAGGAGT	AGTCAGAACAGTTTTTCTAAATATGGATATAAAATAATGGGGGGTGCATTATGAATTGCTGAAGGTTCATTGTTCGAGGATGATGAAGTTTTGAAGTGTTAAGTAGATCAGTGTTGTGTTTGTCAACCTTGGTAGACATTATCATAATCCTCGATGTTGACAGTGTATTGTGATTGAAGATGCATTAGCTGGAGTACAAGCTTCCAAAGCTGCAGAAATGAGTTTTTTTTTAAACTGAAAAAAAAAAACTCAATTCTGCAGCTTTAGGAGTTTGTACTCCAGCTAAGTTGTTGGTATCGC	271
	miR8033-5p	miR8033	TTCCAAAGCTGCAGAAATGAGT	TAAATTATATTTCTGGACAGAAAAGAGATGCTCAGTCGTCATTCTGTCAGTCAGAACAGTTTTTCTAAATATGGATATAAAATAATGGGGGGTGCATTATGAATTGCTGAAGGTTCATTGTTCGAGGATGATGAAGTTTTGAAGTGTTAAGTAGATCAGTGTTGTGTTTGTCAACCTTGGTAGACATTATCATAATCCTCGATGTTGACAGTGTATTGTGATTGAAGATGCATTAGCTGGAGTACAAGCTTCCAAAGCTGCAGAAATGAGTTTTTTTTTAAACTGAAAAAAAAAAACTCA	271
	miR164b-3p	miR164	CACGTGTTCTCCTTCTCCAAC	TTTTTCCAGCTATAAATACTTGAGCTACCCCAAACTTCTTATTTGTCACCTCAAGTTCAAAAATGAACAATTCCCTCACACAATGCAAGAAAATACCTTCTTTATTTTTGGTTGTTGAAATTGTAGAGTTGGTACTTTTATGGAAATATTGGCAATAATGGGTGGGTAGCTCATGTTGGAGAAGCAGGGCACGTGCAAATTCTTGTATTCGACGATATACGCATTACTATTGGTAATGCATGTGTTTTGCACGTGTTCTCCTTCTCCAACCCGAGTTTCCTACCTCCTCTGCTCTCAAGA	270
	miR162a-5p	miR162	TGGAGGCAGCGGTTCATCGATC	TGGAGGCAGCGGTTCATCGATCTGTTCCCTGAAAAGCGATAAATATAGCAACAGGAAGCGATCGATAAACCTCTGCATCCAGTGCTTAACCCGCCTCACATTGTTAGGGCATCGATCTGGTTTTCTGTTTTCTGGCTGGTATTTGATTTCTGGTCTCGATTAATTTGGATTTGCGTTGTTTAAGATCTGTTTAAGTAAAAAAAATGTTTTCAATCTGAATTTTTTGACGTTTCAATTATTTTGGATTTGCGTTGTTTAAGATCTATTTAAGTAAAAAAATGTTTTCTATCTGAATTTTTT	22
	miR482a-5p_2	miR482	GGAATTGGTGGATTGGAAAGC	AATAATAAAATAATTATTTGCATGACTTTAAGCAATAAGGTCCCCTGATGTGAGTGGTCCAGGCTATTAACAACTCAGCTTCCTACCTCTTTCCGCCACACCACACTTTGTGTTTTTTCCCTTATAAAAGGTCTCTATCGTTTCTGCATTTTAATTCACATACACAAACTAACTAGGTTGGTTTTTTGGTATACTAAAAGTTGAGTTTAGCAGATATGAAATTGGAGATGAGTTTTTCGAAAATCTATGGGAATTGGTGGATTGGAAAGCTTTTATTTTCTTCTGATTAGCTTTCCAATT	270
	miR162a-5p_1	miR162	GGAGGCAGCGGTTCATCGATC	GGAGGCAGCGGTTCATCGATCTGTTCCCTGAAAAGCGATAAATATAGCAACAGGAAGCGATCGATAAACCTCTGCATCCAGTGCTTAACCCGCCTCACATTGTTAGGGCATCGATCTGGTTTTCTGTTTTCTGGCTGGTATTTGATTTCTGGTCTCGATTAATTTGGATTTGCGTTGTTTAAGATCTGTTTAAGTAAAAAAAATGTTTTCAATCTGAATTTTTTGACGTTTCAATTATTTTGGATTTGCGTTGTTTAAGATCTATTTAAGTAAAAAAATGTTTTCTATCTGAATTTTTTG	21
	miR482a_1	miR482	TTTCCAATTCCACCCATTCCTA	CCCTGATGTGAGTGGTCCAGGCTATTAACAACTCAGCTTCCTACCTCTTTCCGCCACACCACACTTTGTGTTTTTTCCCTTATAAAAGGTCTCTATCGTTTCTGCATTTTAATTCACATACACAAACTAACTAGGTTGGTTTTTTGGTATACTAAAAGTTGAGTTTAGCAGATATGAAATTGGAGATGAGTTTTTCGAAAATCTATGGGAATTGGTGGATTGGAAAGCTTTTATTTTCTTCTGATTAGCTTTCCAATTCCACCCATTCCTATGGTTTTTCGGTATCCTCTCCCTTTTCTC	271
	miR162a-3p	miR162	TCGATAAACCTCTGCATCCAG	CCATAGATTCCTGTAGTTTTTTTTATTGTATATATATATATATATTTTCTTTGTTATATCGTCATTTTCGAAGTCAATGAGCTTCGCAACCTGTTTTTTTTTTTTCGAAAAAAATTTGGTTTGAGGTTAGATCTATGTGATACAAGCGGGATAACTGATCTGTTTTTCTTTTTGTTGGGTTAGAACACTGGAGGCAGCGGTTCATCGATCTGTTCCCTGAAAAGCGATAAATATAGCAACAGGAAGCGATCGATAAACCTCTGCATCCAGTGCTTAACCCGCCTCACATTGTTAGGGCAT	270
	miR171c_3	miR171	AGATTGAGCCGCGCCAATATC	TTTATGCTAGTTTTCGTAAAGAACGATCTCAGATTGAGCCGCGCCAATATCACTTCCTATTTTCATTCATTTTTCCCACCTAATGACTGATTAGATCCAAAGTTGCGCATTATGAAATTCATTTCTCTAAAGACAACGCTCCCAATAAAATATATTTCATTCTCAATGGCTCGAAGTGGAAATTACTTCCTATTACCATTTCATTCGTCCATTTTTCTTGTCCATAGTTTACATTTGTCTATAAGGCTTCTCTTTTTTGCTGTTTTTGTTCTAAATAATAAAATCACAGTTCATATTCTA	51
	miR171f_3	miR171	TTGAGCCGCGCCAATATCACT	TCCTAGTTTGAATTGTCCTCCTTTAATAAAATCTTGAATAAAGGGAGAGTTTTTTTTTTCTTATTAAACAATTTTCTAAGGTTATTACCTACTGTTAATCCAATTTGTCATCTAATTAAGATGTCTTTATTTGTTCTTGCTAATTGTAGTGTAATTGAAGTCCTTGGAGTAAAAGTGATCAAAACAGAAATCTGATGGGGTAAAAATGGAAGAAGCGATGTTGGTGAGGTTCAATCCGAAGACGAATTTATGCTAGTTTTCGTAAAGAACGATCTCAGATTGAGCCGCGCCAATATCACT	300
	miR396b	miR396	TTCCACAGCTTTCTTGAACT	TTGAAGATTTATATAAAGTCCTATCATGTTTTTCCACAGCTTTCTTGAACTTCTTTTTTGCTTGAATTTTCATCTAATTGGTAATTACTAATTATTATCAGAAAATCGTTAATTTCTGACAAATTAAGTCTAGACGGAATTTTGCTCATGGTAACATGAAATTCATCGTAAATGTTATTGACTAGCCAAATTCTGATGAATTTTGTTGGAAATTAGCGATTTTCTGATAGCGGATGAGATTAATTAAGCTATGAAAGTTCAAGAAAGTTGTGGGAAAACATGGTGAATTTAGGACTTTTT	51
	miR396a-3p_5	miR396	TTCAATAAAGCTGTGGGAAG	NNNNNNNNNNNNNNNNNNCACCCCCACTCAAATTACCCCTATAAATACTGCCCATTCTTCTCCTCTTTCAACACTTCACTTCTTCCAAAATTCTCACTCACACAACAATTAAAAATAATCTCTATTTTTATTTTCTCAAGAAACCCTATTTAGGGTTAATGAGATTCTAAATGGCTCTTTTTGTATTTTTCCACAGCTTTCTTGAACTGCATATATAATTATTCGATGAAGAGAGTTAAATTGTTGCGGTTCAATAAAGCTGTGGGAAGATATATATAGGGTCAAGAATAACATGTTTTT	269
	miR171e-5p	miR171	CGATGTTGGTGAGGTTCAATC	AGAAATCTGATGGGGTAAAAATGGAAGAAGCGATGTTGGTGAGGTTCAATCCGAAGACGAATTTATGCTAGTTTTCGTAAAGAACGATCTCAGATTGAGCCGCGCCAATATCACTTCCTATTTTCATTCATTTTTCCCACCTAATGACTGATTAGATCCAAAGTTGCGCATTATGAAATTCATTTCTCTAAAGACAACGCTCCCAATAAAATATATTTCATTCTCAATGGCTCGAAGTGGAAATTACTTCCTATTACCATTTCATTCGTCCATTTTTCTTGTCCATAGTTTACATTTGTC	51
	miR396a-3p_1	miR396	GTTCAATAAAGCTGTGGGAAG	NNNNNNNNNNNNNNNNNNNCACCCCCACTCAAATTACCCCTATAAATACTGCCCATTCTTCTCCTCTTTCAACACTTCACTTCTTCCAAAATTCTCACTCACACAACAATTAAAAATAATCTCTATTTTTATTTTCTCAAGAAACCCTATTTAGGGTTAATGAGATTCTAAATGGCTCTTTTTGTATTTTTCCACAGCTTTCTTGAACTGCATATATAATTATTCGATGAAGAGAGTTAAATTGTTGCGGTTCAATAAAGCTGTGGGAAGATATATATAGGGTCAAGAATAACATGTTTT	270
	miR396a-3p_4	miR396	GTTCAATAAAGCTGTGGGAA	NNNNNNNNNNNNNNNNNNNCACCCCCACTCAAATTACCCCTATAAATACTGCCCATTCTTCTCCTCTTTCAACACTTCACTTCTTCCAAAATTCTCACTCACACAACAATTAAAAATAATCTCTATTTTTATTTTCTCAAGAAACCCTATTTAGGGTTAATGAGATTCTAAATGGCTCTTTTTGTATTTTTCCACAGCTTTCTTGAACTGCATATATAATTATTCGATGAAGAGAGTTAAATTGTTGCGGTTCAATAAAGCTGTGGGAAGATATATATAGGGTCAAGAATAACATGTTTT	269
	miR396b-5p	miR396	TTCCACAGCTTTCTTGAACTT	TGAAGATTTATATAAAGTCCTATCATGTTTTTCCACAGCTTTCTTGAACTTCTTTTTTGCTTGAATTTTCATCTAATTGGTAATTACTAATTATTATCAGAAAATCGTTAATTTCTGACAAATTAAGTCTAGACGGAATTTTGCTCATGGTAACATGAAATTCATCGTAAATGTTATTGACTAGCCAAATTCTGATGAATTTTGTTGGAAATTAGCGATTTTCTGATAGCGGATGAGATTAATTAAGCTATGAAAGTTCAAGAAAGTTGTGGGAAAACATGGTGAATTTAGGACTTTTTT	51
	miR171d_1	miR171	TTGAGCCGCGCCAATATCAC	ATCCTAGTTTGAATTGTCCTCCTTTAATAAAATCTTGAATAAAGGGAGAGTTTTTTTTTTCTTATTAAACAATTTTCTAAGGTTATTACCTACTGTTAATCCAATTTGTCATCTAATTAAGATGTCTTTATTTGTTCTTGCTAATTGTAGTGTAATTGAAGTCCTTGGAGTAAAAGTGATCAAAACAGAAATCTGATGGGGTAAAAATGGAAGAAGCGATGTTGGTGAGGTTCAATCCGAAGACGAATTTATGCTAGTTTTCGTAAAGAACGATCTCAGATTGAGCCGCGCCAATATCAC	300
	miR7995	miR7995	TTACACGTAGACAAGTTGACCATT	TATCATACAACAATGCAGTTGTGGACTATAACAATATGCTTAAAGATGCATTGGCACAAACAAGAAAAGATCTTTCAGATGCAAATGTTATTTATGTGGACACTCATGCTGTCCTCTTAGAACTTTTCCAACACCCCACTTCTCACGGTACGTACTCCAATTGAGCACCTAAACATGTGATCAAATGTTCTTATTAGACACTTCTGACACAAACTATTGAAAAAGATTTTGTGTGTTTATAAGCGTCCATTACACGTAGACAAGTTGACCATTTAAAATAAGACGACTCCTTTAATTATA	273
	miR7982a	miR7982	AAGTTGGATGATAATAATATATAT	ACATGCCATCGGTACGATTGTAGCACAAGACTATATGTAATTTATCTTGATTATGGGAACGGAATAGTTCCAACTTCTTGTGCTAGGGTGTTTTGTATGTATTGAACGGGACCGAGTAGAGATAGTTGTTTTAGACTGACTGACAAAAATATATTCTCTAAACTATTAAATGTACTTATATTTTTAATTCTGATATAACTATTATGATCTGTATAGATTAATTATCATTTTGATTTATTAAAAGGTGAGATTCTGAGATGAGTCAATATGCCTGGTAAGTTGGATGATAATAATATATAT	300
	miR160a-3p_1	miR160	GCGTATGAGGAGCCAAGCATA	TAATTTTTATTTTCACTAGATAAACCATTATTCTCCTCTTCTAAATTCATATTTCTTCATCTTCTTGATTCTTGAAAATATATATATATGATCATGTAGAGATTATGAATTTAAAGAGCTAATAATTATATATATGCATATGAGTATGTGTGTATATGTATTGATACACGTCGTGTACACGTATATGCCTGGCTCCCTGTATGCCATTTGCAAAGCTCACCGTAATATATCGATGGGCCTTGTTGAATGGCGTATGAGGAGCCAAGCATATTCCGATATCGTGTATATGATGTTGATATA	270
	miR172b-5p_3	miR172	GCAGCACCATCAAGATTCACA	TGCCTCAACATACAGTTGTTGCTTGCTAGTGCAGCACCATCAAGATTCACATAGAAAATATGGACTATGAAATGAAATATGCCCAATTTTTGAATACATGAGAATCTTGATGATGCTGCATTGGCAAATTGATGACTTGATTCTTTAATTCTACAAGAAAATTTGGGCAATTTATCTTTATTTGGTAAGTTTTCTTTTGGACTATGATTAATTCTATATGATTATTGATTATTAATTACTTATTTTGGTTAATATGTTGTAGTTTTCTTGATATAAAATACCTCATGAATTAATTATTAA	51
	miR172d-5p	miR172	CAGCACCATCAAGATTCACA	TGCCTCAACATACAGTTGTTGCTTGCTAGTGCAGCACCATCAAGATTCACATAGAAAATATGGACTATGAAATGAAATATGCCCAATTTTTGAATACATGAGAATCTTGATGATGCTGCATTGGCAAATTGATGACTTGATTCTTTAATTCTACAAGAAAATTTGGGCAATTTATCTTTATTTGGTAAGTTTTCTTTTGGACTATGATTAATTCTATATGATTATTGATTATTAATTACTTATTTTGGTTAATATGTTGTAGTTTTCTTGATATAAAATACCTCATGAATTAATTATTAA	51
	miR5303j	miR5303	AATATTTTTGAAGAGTCTGAGCAA	ATGAAAAATTAAGAAATCGAAATCCATCAGATCACCCACCTCTCAGTAACTGTTGCTACTTTCTTAGATATCATGGACTCGGCTATGCTGATAGCTCTTTGAGATCCGGTAATAGTCACTTTCCTGTAAAAGTCCAGAAATTATTTATCTTTATAGTCTTATGTTGCTCGGACTATTCAAATTGCTGCCCCACCCTGTGTAAGATCCTCCAAAAATGACTACTTTTGAAGGATTAAACACGCATCCGGCAATATTTTTGAAGAGTCTGAGCAACGTTACGATATACTTCACATATCCTCA	273
	miR172d-5p_4	miR172	GCAGCACCATCAAGATTCAC	TTGCCTCAACATACAGTTGTTGCTTGCTAGTGCAGCACCATCAAGATTCACATAGAAAATATGGACTATGAAATGAAATATGCCCAATTTTTGAATACATGAGAATCTTGATGATGCTGCATTGGCAAATTGATGACTTGATTCTTTAATTCTACAAGAAAATTTGGGCAATTTATCTTTATTTGGTAAGTTTTCTTTTGGACTATGATTAATTCTATATGATTATTGATTATTAATTACTTATTTTGGTTAATATGTTGTAGTTTTCTTGATATAAAATACCTCATGAATTAATTATTA	51
	miR7997c	miR7997	ATATTGCTCGGACTCTTCAAAAAT	ATATTGCTCGGACTCTTCAAAAATGTTGATAGATGCATGTCAAATCTTCTAAAAAGTAGTGCATTTTTGGAAGATTCTACACTAATATGGCAATATTTTTGGAGAGTCCGAGCAACATTTGTATAATAGCAACACCGTGCATGAAGAAAAAGTAACATGTGCTGTGAACCAAAGCTACTCCCCTTCTACTTCTACCTTGATTGTCTAACAATGTTATTATTAACTTTTTGAAGGTTTTGGAGGAGAATCTTGAGTGGGAAAACATTCAATGGTCACAAACTGGTGTTTGGATTGCTGGAA	24
	miR160a-5p	miR160	TGCCTGGCTCCCTGTATGCCA	TGCCTGGCTCCCTGTATGCCATTTGCAAAGCTCACCGTAATATATCGATGGGCCTTGTTGAATGGCGTATGAGGAGCCAAGCATATTCCGATATCGTGTATATGATGTTGATATATGTAACCATCTTGTGATATAAAGTTACCTCTTTTTTTCTTTCTTTCTATTAATTTAATTTGTTTATGTTGAGATCTAAACTAGGTTATGGTGATTGTTGAAGAATTCTTCATTCTCAGTTGAAACAGGTAAGTATTTTTTAAAATTAATTCATCCTGTCTACTTTCTAAATTTACATCATGATAA	21
	miR160	miR160	TGGCATACAGGGAGCCAGGCA	TTATCATGATGTAAATTTAGAAAGTAGACAGGATGAATTAATTTTAAAAAATACTTACCTGTTTCAACTGAGAATGAAGAATTCTTCAACAATCACCATAACCTAGTTTAGATCTCAACATAAACAAATTAAATTAATAGAAAGAAAGAAAAAAAGAGGTAACTTTATATCACAAGATGGTTACATATATCAACATCATATACACGATATCGGAATATGCTTGGCTCCTCATACGCCATTCAACAAGGCCCATCGATATATTACGGTGAGCTTTGCAAATGGCATACAGGGAGCCAGGCA	300
	miR5303h	miR5303	AACATTTTTGAAGAGTCTGAGCAA	CAAGAAATGTGCAGCTGCTACTGAAACTGTTCTTGCTGCTGTTTATAAGGCACTCAATGATCAGCATGTTCTTCTTGAAGGAACACTTTTGAAGCCCAACATGGTCACCCCTGGCTCTGATAGCCCAAAGGTAAGTAATTTAAGTTATATACACGGAGAGCGTAAAAGATTTTTATATTGTTAATGTATTTTTAACCTGTTGTAGCCTATGGTGCTCAGATTCTTCAGTACCTTCAACCATGCACTACTTCTAGAGGATGGTGATTTGCACCCGACAACATTTTTGAAGAGTCTGAGCAA	300
	miR164a_2	miR164	TGGAGAAGCAGGGCACTTGCT	AGCTAGTGAAAGTTTGGTTAGGGGTGAAAATGGAGAAGCAGGGCACTTGCTCATAATATAATTCATTCATATTGATATTGTTGTTAGGGTTTATTTGGTCGAAAGTAATGTAAGGATCCATTAATGGTGGTAAAGATGAAGAACTTATTGTATCGTTATCGTAGTATATGTTGTTGCTTCCAATTCCTTGCTTGGTAGCAAGTAATTCCTTGTTCTTGTGAAATACTCGGCATAATACCCAATCCTCCTGTTTCAGAAAAATGAGAAAGACGTTTAACTTTTATACACTAACAATATGTA	51
	miR5141	miR5141	AGACCCGACGCGACTGACAGATAA	GTCTAGTGGCATTCGATCACAGAATCCATTGACAGCTGCATAAATGACTAGAATTTGTTTTTCAATTGGCAGTGGTGCATATTGTGGTTGTTTCGGTACTTCTGTCAGCCTTGCACCTCTATTGAGTAATGCCTGAGTCGCAGCATCAAGGTCTGAGCCAAATTGAGCAAGGGCGGCCACTTCGCGATATTGTGCCAATTCAAGTTTTGAACTACCGCAGACTTGTTTCATAGTTTTCAACTGAGCGGCAGACCCGACGCGACTGACAGATAAGCCGACGTTAATAGCAGGTCTAATTCC	273
	miR8000	miR8000	ACACCGAAGAACTGACACCGAAGA	TTTAGTTTAGACTTTAGGTCTTTAGGGTTTACTATTTTGTTATTTAGATTTTTACTATTTAAGTTTAGGATCTAAATATAAAAATTGAAATGGGCCAAGTAAAGTTAAAAATTAAGTAATATAATAAATACTTTTAAATTTATTTAATAAAACTTCGGTTCTTCGGTGCACCGTAGTTTCGGGATCCTTACACCGAACTCCGAACTGAAGAACCAAAGTTCCGGAAAAAAAACCCGACACCAAATCGAAACACCGAAGAACTGACACCGAAGAACCAAATTTTTTCGGTTCGGTTTTTCG	273
	miR7999-3p	miR7999	ACGACCCGTAGAACTGCCCACGAC	AAATACAAAAATGCCCATACTTAAAACAACTGGAGTGATCTACGATTCCGATCTACGGCCCGTAGGACTTTCTATGGCCCATTCTTGTCAATCGTAGAACCAACTTCAAATGCCTAAAAATTAAATCTTTCCAGACAAAACCTTTCCACGAATCATCAACCAGCCTACGATGTGTAGACCCCTTTTGTAAAACCCAAGTTCGAATTCAAAAAATTTACTTAGTCTGGGTCACTTCTACGGGTCCTTCCTACGACCCGTAGAACTGCCCACGACATGTAGATCCTTCTCGTAGGTCCAAAG	273
	miR8040-5p	miR8040	TCATAATTACAATTATAAGCC	TCAAAAAGTAGTGAAACCAATATAAAGGGATCATAATTACAATTATAAGCCTCATTTATTTTTTTTGAGGCAGAAAAAAAAAATGAGGCTTATAATTGTAATTATGAGCCTCATTTATAGACTTGGAATAGATTACAAATTGACAGGTGCTGAAGATAAACATATCCCACAGATTCTTTTTCTTGCAAAAGATGTCCAGCATATCTCACAAATTAAACTATCTAAACATTGTTAGGTTTTATTAATTATTTAAATTATCAATTATTATTATTATTATTAATATAAACACACATATACATG	51
	miR156_2	miR156	TTGACAGAAGATAGAGAGC	AGTGCAGGAATTATAACAACAAGAGGAAAATTTAAACAAAAATCTCAAAGTGAGTTGGAATGTCAACATGGAAGACTTTCGAGCACCATGTGATATGTATTGATACTACAAATATTTCATTTTTTGAATACTAGCAGACAGTGCCAGCGGTTTATTCTTTTTGTCCTTCCCTTTACATAAGGGAAATGAAAGTACTATTAGCTAGATACTTGAAGTTCACAGATAGCAATTTGCTTACAAATCCTGGAATTGACAGAAGATAGAGAGCATGCTTAAACCACATCTTGTTTATGTAATTTG	268
	miR8042	miR8042	ATTAGACTGAAGTGCTGATCT	AACACATGTGAATTGACACAACTTTCAGAAATTAGACTGAAGTGCTGATCTGGTTTCTTATATACAGTATAATGTACATAGTTTGGTTTGTAGCTTTTTATACAGTATAATGTACATAGTTTGGTTTGTAACTTCTTACAAACATTTTTGCACATGGAAACTGTTATTTACTTTCTTCTACTGTTGTATAATTGCATTTTTGTGTATGCTAATGCAGGAACTTCAAATGGGATGGCAAAGTCTCTTCTAGATTCTGTTGGTGAATCTTGTACTGCATTTAATGCAACTCTTGCTATAATT	51
	miR399e	miR399	TGCCAAAGGAGATTTGCCCAG	AAGAACCACCAAACCTCGGAACTTACAATTTGCCAAAGGAGATTTGCCCAGCAGAGCCAATAGAGAGACGCATATGTAAATATACGCTTTGCTTAAAAGAATTTGCTCCTCTCAAAGGCCAGGGGAATTTTGCCAAAAAAAAGATTTGCCCCAAAAGAGATGTCTTGGACAGTTGAATCAACCAGAAATAGACAGATGTGTTGGCTAAAGTGCTTAAAATGCGAAAGATATATCCTTTCTTGAGTAATCTTCAGCAAAGGAAGCTTCTTAGAAAATGTTGGTTGATCTGACGGACAGAAC	51
	miR156b	miR156	TTGACAGAAGATAGAGAGCAC	TGTTAAAAGAGGAGGTGGTAGGAGATGTTGTTGACAGAAGATAGAGAGCACAGATGATAAAGTGCATGGAAATTGTCTGCACCTTACTCCTTTGTGCTCTTTATTCTTCTGTCATCATCCTTAATCCCCCACTTTTTTTTTATCGTTTTTATATTGTTATATAAATATTTATCTTATATTAACTCATATATAATGTTATTCTATTTTTAACTGTAATTTGAATGATGAAAAATTGTAGTATATTTTTAGATATAAAATATACATTTATTGAAACGTGTAACCATTTCATATAAAATTATA	51
	miR156h-3p_3	miR156	GCTCTTTATTCTTCTGTCATC	TTTATTTTAACTGTAATTTGATCAATAAATAATTTTTTGATATAAAATACAAATATATATACACATTTCATTAAAAAAATATATAAACTTTATATATTCAAGTGTATAACGGTCTTATCTACAAAACTCAACTATTGAACCTTAACTATAACACCTGCTACAACCATCTTTCTATGATCGTATATGTTAAAAGAGGAGGTGGTAGGAGATGTTGTTGACAGAAGATAGAGAGCACAGATGATAAAGTGCATGGAAATTGTCTGCACCTTACTCCTTTGTGCTCTTTATTCTTCTGTCATC	300
	miR156g_1	miR156	ACAGAAGATAGAGAGCACAG	TTAAAAGAGGAGGTGGTAGGAGATGTTGTTGACAGAAGATAGAGAGCACAGATGATAAAGTGCATGGAAATTGTCTGCACCTTACTCCTTTGTGCTCTTTATTCTTCTGTCATCATCCTTAATCCCCCACTTTTTTTTTATCGTTTTTATATTGTTATATAAATATTTATCTTATATTAACTCATATATAATGTTATTCTATTTTTAACTGTAATTTGAATGATGAAAAATTGTAGTATATTTTTAGATATAAAATATACATTTATTGAAACGTGTAACCATTTCATATAAAATTATATA	51
	miR172c_2	miR172	AGAATCTTGATGATGCTGCAG	ATCGCACTCCTAAGTACTATTTATAGAACCCTCTTTAGACTCCTTTGAACATCCATCTCTCCCTTTCTCCTCTCTTTTTTTTTTTTCTTCCAATAAATCTTCAATTTATTTTCTAAAGCTTTTGGGTTTTTTTCAGTCAATTTTTGCAGATGCAGCATCTTCAAGATTCACATAGATTTATATAATATATAGAGTTCCACGATGGGGTGAAAGTGATTAATTAATATTAATTAATTAATTTGCTCCTATATATTGGCTCTATTAATTATTTTTGATGTGAGAATCTTGATGATGCTGCAG	300
	miR1886h	miR1886	ATTTTACGTTGATTTCATCTCATG	GAGATGAAATCAACGTTTAGATATGTGATTTTACGTTGATTTCATCTCATGATTTCATATTGTGAGAGGAAATTTCAAATTCTCATGATTTGGAAATTTCAAATCAAGATTTGGATTTTTTTCAAATACAAAAATTGGCTCACAAATTTATATTTTGTAAAAACAACCCCACATTTATATCTACTAACCATTTATTTCATATGTAAATAAAATTTATAATTCATATCATTACTTTTTAAACCATTTATATCTCATATAATGATTACTCTCACGAACATAAAATTTATTATTATTACTTTA	51
	miR8002-5p	miR8002	TTTTTCGTGATAATAATGGAATCA	GGTTCTTTGGATAGCTCCTTTATTTTATTTTTCGTGATAATAATGGAATCATGATATGTTAGAGTTGTTGTTGATTTCAACGTAAATAAACTAAATATGATTCCATTATTATCAAGAAAAAAGAAATAGAGTAGGAGCTCAAAGAATTATTGATTGAGCAAGTAAAAGTGATTTGAATGATTGTAGTTATGTGTATATCTTCATATTTATTATATATATTTAATTAATATGAAGATACATATGTAACTTGTTCAATTTGAATAATCAAGAAAATAATTTATCTTGATTATAGCTAGTGAA	51
	miR172c-3p	miR172	AGAATCTTGATGATGCTGC	TTATCGCACTCCTAAGTACTATTTATAGAACCCTCTTTAGACTCCTTTGAACATCCATCTCTCCCTTTCTCCTCTCTTTTTTTTTTTTCTTCCAATAAATCTTCAATTTATTTTCTAAAGCTTTTGGGTTTTTTTCAGTCAATTTTTGCAGATGCAGCATCTTCAAGATTCACATAGATTTATATAATATATAGAGTTCCACGATGGGGTGAAAGTGATTAATTAATATTAATTAATTAATTTGCTCCTATATATTGGCTCTATTAATTATTTTTGATGTGAGAATCTTGATGATGCTGC	300
	miR171a_3	miR171	TGATTGAGCCGTGCCAATAT	CCAATAGTATATTCTTGGTCTCTTCGTTTATTCGAAAAAGGGATGCAACACGAGTACTTCCTCATGGGATCATCCACCTTAGTATGTTATTTCTTTGAAAAGCTTCTATTAAGATAGGAAATTCTCCGATAAAGCTGCTAATATATATCAGGTGAACTCATATATTCTTGTTCATGCTTGACTTCACAATTATGAGGAATTCGGTGCGATGTTATGGAATTGTGATGTTGGAATGGCTCAATCTAATAAAAGTTTCCAAACATTTTTGGTTATTTTAATTTGATTGAGCCGTGCCAATAT	300
	miR8026	miR8026	ATGTAGAGAATATGTGGTAACCCT	TTACCACAACTGTCAGCGATGAAATTAATGTAGAGAATATGTGGTAACCCTAATAGGTGGAGGGAGGACCAATTTATAGAGGTTAAGACTTAATCTGGTATGTCCATCAAATAATCAATGTACGAACGAGATCTATTATTTATTAAATATTATTTATGGTATTACTTGGGTTACAAGTAAACTTGGACCATAAGTAAGAAATAATTAATAATTCTTACATGACCAACATATTGAACTTTGATGGTGTTTGAAATCATATCTTGTAGTTGTTGAATCGTTATAGTAGCCGGTGAAGTATAT	51
	miR172a-5p_4	miR172	GTAGCATAATCAAGATTCACA	ATAGTTTTCTTACAGTCGTTGTTTGCGTATGTAGCATAATCAAGATTCACATGAAAAGTTGCAAATTTGTTATATAATTGATGAAATTAATGGCTAGCTATTTGAAATTCATGAGAATCTTGATGATGCTGCATCAGCAATAAATGACTATTGCAACAAAAAACGATACAGAAAAGATTAGTATGATTCTTGTCAAGAACGGCACGAATCAAGAAATGATTTATTTATTTCTTAGATCAGGAACTTGTAAGTATATATACTTCTAATTAGTTCTTTATTCGTATGAATCTTTTCTTTTTT	51
	miR166	miR166	TCGGACCAGGCTTCATTCCCCC	TTCATCTACTCCACTAACTACTTTTTATTTTAACAACTCATCATATTTCAATTTCCAAATCAATATTCAGTAAATTATATTGCTGAATCAATAGATGGATCAGAGGAGTAGCTTCCAGATTTGAGGGGAATGTTGTCTGGCTCGAAGTCATTATGTCTTCTCGATCATTTAAGTACTATAGATCGAACCAATTCAATTTATATTTTTAAATCTAGTGTAAATATATATGATCACCATGAGTTAGTGTCTTCGGACCAGGCTTCATTCCCCCCAATTTGGAAACCAAAATTTGCATTCCCT	271
	miR7988	miR7988	AACGGAAAAGGGCCAAAAATACCC	GAAGAAGAAAAGGAACGTTAAAATTAAAACGGAAAAGGGCCAAAAATACCCTTAGACTATTTGAAAAGGTTTAAATATACCCTTCATTTACCTATTGGGCTGAAAATACCCCTCAGTCTACCTTTTTGGTCCATTTCTACCCTTAAAACTAACACCCTTTTTAAAAAAATATTATTATTATTATTATTATTATTTATTACGTGGCATTTTCTTATTGGATAAATTAAACCCCAAACCATTTAATTTCTCTCTGCCCACTCTGACCCATTCCAGTGCTCACAACCCAGAACCCAATTAAAA	51
	miR8043	miR8043	TGATATAATTGGACTTTGGCC	CTGATTAAGATTCAAATGATGTATTTTTAAGTGTTAGTTTTTAGAATCCAAAACGAGGGCTTCAATTTGGATATTTGCTCCTTCAGTTAAATGATGCAAATCATTAACATGCTATGGGAATGCTGTGATGTTATGGTGTATGTGGCCAAAGTCCGATTATATCAACTTTTACTTTTTTTCTTTTTAGAATAAATAAGTGGAAATTATCCATTTCCCACTTATTTATTCTAAAAAGAAAAAAGTAAAAGTTGATATAATTGGACTTTGGCCACATACACCATGATTTTTTGCCTTGCATCT	270
	miR7994a	miR7994	ATATTATACTTGGGCATAAACTCC	ATTTTATGTTGTCAATTATCATGATTTATAGTATTTTTACGCAATTTTTAAATATAAAATAGTGGAATTTTTTGAATTTTTTCAAAACATATTTTATGTTGTCAATTATCATGATTTATAGTATTTTTACGCAATTTTTAAATATAAAAAAAATTAAGACAAATAAATTAAAATGGACGCAATATATGTTATTTTTGTTGTCTCAATTTATGTGACACAAATAAAATTTGAAGACTCATTGAATATTAAATATTATACTTGGGCATAAACTCCCTTACGCACGGGCCTAATAACTATTAT	273
	miR7980b-5p	miR7980	GTCCAAACACTGATTCCATCTCAT	AATTATGTAAGACTGTACAAGCTATGTTTATTTTCACTTGTGTGTCAATATCATAATGATTCATGCCTTGTTTCAGTATTCTAAATCTATTTTTCCAAGCTCCAAAAGTCCGTGGGGTTGTTTTAACAAAATATAAACTTGTAGATCAATTTTTGTATTTAAAAAATCTCAAATTTCATGATTTTTGGAGAATATGGAATTCCAACTCATGACATGGAATCATGAGATGGAATCAACGTGAAATCGCATGTCCAAACACTGATTCCATCTCATGACTTCATATCGTAATATGGTATCGGA	273
	miR171b-5p_1	miR171	ATATTGGTGCGGTTCAATTAG	TGGTAAGATTATTTTAATTCTTCAAACGAGATATTGGTGCGGTTCAATTAGAAAGCACACTTCTTTATATATAGAACTTCGTTATTTAATTGAGCCGTGCCAATATCACGTATAATATCTTCTTTTTTCTCTTGATTTTGTCTATTTAATTGTTTTCCATTCTCTTAATTAGTTCCTAACTATATTTTTGAAGCTTCTTGTCCACCCTCTCCTAATTAATACCAGATCAATTTTCTCTCTTTATCTATATGTGTTGGAAAATGAAAAGTAAACAAATTTATTTTGAGTTTTTATTAAAGA	51
	miR171f_2	miR171	TAATTGAGCCGTGCCAATATC	GGACCATATGTATATATAAGAGGGCATAATATTCTTGATTACAACTAAGATATGCCAACTACTTCCCTACCATTATATTTATTCTGTATCCTCAAGATTCCTGTTTGTCTATCTATATATATCCTCCCATCCTTTTCACTTTCCCTTCAGCTAACTTATTAAAATCTGCTGCCTAATCTTTGCTTCGATATCATGGTAAGATTATTTTAATTCTTCAAACGAGATATTGGTGCGGTTCAATTAGAAAGCACACTTCTTTATATATAGAACTTCGTTATTTAATTGAGCCGTGCCAATATC	300
	miR8044-5p	miR8044	TTTCAAATATGGTTGGAGATG	TTTCAAATATGGTTGGAGATGTTTGCTTGACCATGCTTTCAGATGATGAGTTTTCTGACAAACATCTCCAGCGATATTTGAAACTTAAAATGAAGTCATCGAGCAAGGATCCAAGAGGAAAAAGCTAGGTTTTCAAGCCAATCTCTGTGTTTCCCAAGAGCTTTGTTCTTCCAGGTATGTATGGTTATTCCTAGTGATAGACTGAGTTCGTCCTCATGCCCTACATCTTAATTCAGGCAGTAAGAGTTAAATCTAGGATTATACCCTTAGCTTCGAGAGTCTCTTATATGAGTCGAGTTA	21
	miR8044-3p	miR8044	TCTCCAGCGATATTTGAAACT	TTGAAATTTATGCCAAGTTTCCTTTGAAATCTTCCAAGTCATATTATAGATTATTATCATCCATTGAAATCTTAATCTTGAGCACCAATTTTGCTTCTAAACTGACATCTTTCTTGTTTACGCGAGTGTTTCATGGATCAAGCTCAGATCAAGCGTTAAATGCAACAACGAGACTTCAATTCAAGTTTCAAATATGGTTGGAGATGTTTGCTTGACCATGCTTTCAGATGATGAGTTTTCTGACAAACATCTCCAGCGATATTTGAAACTTAAAATGAAGTCATCGAGCAAGGATCCAAG	270
	miR403-5p_1	miR403	CGTTTGTGCGTGAATCTAACA	CGTTTGTGCGTGAATCTAACAACCCTTTTCATCAGAAAAACTGTTGTTGTTTGCTAGATTCACGCACAAACTCGTAATATGTATTTTTCGAATATCTGCGCTTTGATTTGTATCTATTTCTCCAATTGGTGTGACTCTGAAGTCTGACCTGACCTCTTTTCCCATCTGTGTTACTGTATATGTTTCCGTGCTCTATACTGATGTGATTGATTCTCATGTATCATTTGCATTAGCCACGAAGCTCTTCGGAAATGGGTAAGCCTCTGCATCTGCTCTCTTGAATTTGACGAATGGACTCTG	21
	miR166g-3p	miR166	TCGGACCAGGCTTCATTCCTC	GTTTTTGAGTACCTAATCATCATATCTCTCTCTCTCTCTCTTTTTTTTCTTTCTCAAAGCCTCTCAAAGGCTGAAAAAATAGGGTTAGGGTTTATAGTGTTAGGTATGATGATGATGAAGTAGAAAAGTTTTATATATTGTGTGTGGTGAGTTTGAGGGGGATGTTGTTTGGCTCGACACAATTACTCTCTTGTATGTGTTTATTTATTCGTCATCAAGATTGATGTTGATAACGAATAAATTAAACACAACAAGATATGTAAAAAGGGAGTAAAGGCGTCGGACCAGGCTTCATTCCTC	300
	miR166k	miR166	TCGGACCAGGCTTCATTCCT	GGTTTTTGAGTACCTAATCATCATATCTCTCTCTCTCTCTCTTTTTTTTCTTTCTCAAAGCCTCTCAAAGGCTGAAAAAATAGGGTTAGGGTTTATAGTGTTAGGTATGATGATGATGAAGTAGAAAAGTTTTATATATTGTGTGTGGTGAGTTTGAGGGGGATGTTGTTTGGCTCGACACAATTACTCTCTTGTATGTGTTTATTTATTCGTCATCAAGATTGATGTTGATAACGAATAAATTAAACACAACAAGATATGTAAAAAGGGAGTAAAGGCGTCGGACCAGGCTTCATTCCT	300
	miR167c-3p_3	miR167	GGTCATGCTCGGACAGCCTCACT	TTAATATACCCTTCATTCCTTATCACTTCTTTATATAAATCAAAACACTACATCCCCAATTATTTGAAACAACAAACTCATGAATCCCCACTCTCTTCAAATCATTTGTCCTTCACTTTTAGTTGTATGAATCACAAGTGATTTAAGTTTGTTATTTGTATTAAAGGTCTAGAGTGGAACAAGTGAAGCTGCCAGCATGATCTAAACTTGGCCACACTTATAAAGAAAAAAAATGGGTGACTAAGGTTAGGTCATGCTCGGACAGCCTCACTCCTTCCTTTCTTGATGAAAACACACAAT	272
	miR167b-3p_2	miR167	GATCATGTGGCAGCATCACC	ATATCCCAAAGACTTACCTAGATAGATCCCCAAAGATAAAGGGGTGCATTCTTTCCATCCACCCCTTTATATATACACATCCACTTCCTATACTTAATTTCAAGTACTTGTGTGTTAATATACATTTCAAGTACTCTTATAAGTTGTGGATCTAGGACCGATGTGAAGAATATCGGATCGTGAACCACTAGCAGTTGAAGCTGCCAGCATGATCTAAACTTTTCTATTGCTCTGTACGAGGAAAGATCAGATCATGTGGCAGCATCACCTGTTGATGGTTTCGCGGAATTTGTATCTCCC	269
	miR8008a	miR8008	ATTTCCAGAAAAGCGACGGACAGT	AATTGAATTGAATTTGCAGGTGGGCAGCAGAAGCTGCGAGCTGCTACTGTCAAAAATATTGCAGAAAAAGCGACGGACAACGTGGTTTAGTCCGTCGCTTTTTTGAGTTTTAATTTTTTTTAAAAACCCAGAAAAGCGACGGACAGCGTGGTTTTTTACGTCGCTTTTTTAGGTTTTTTTAAAAAAATTCCATAAAAGCGACGGACAGCGTGGATTTTTCCGTCGCTTTTTTGGGTTTTTAAAAATAGAATTTCCAGAAAAGCGACGGACAGTGTCCTTTTATCCGTCGCTTTTCTGGGA	273
	miR167a-5p	miR167	TGAAGCTGCCAGCATGATCTA	CTAGCTTTTCACCCCCCCTACACCCTAATAAATTATACCTAAACTCATAAAGAAATATCCCAAAGACTTACCTAGATAGATCCCCAAAGATAAAGGGGTGCATTCTTTCCATCCACCCCTTTATATATACACATCCACTTCCTATACTTAATTTCAAGTACTTGTGTGTTAATATACATTTCAAGTACTCTTATAAGTTGTGGATCTAGGACCGATGTGAAGAATATCGGATCGTGAACCACTAGCAGTTGAAGCTGCCAGCATGATCTAAACTTTTCTATTGCTCTGTACGAGGAAAGA	270
	miR8018	miR8018	ACGAACCGTAGATCCCATCCGTGG	GGCCATCTATAGCTCGTGGTTTGATCTACGAACCGTAGATCCCATCCGTGGAATTCATACTAAACAGAATTTCATTCTACGGGTCCAAAATGCAACCCGTAAAAGTTTCTTCGGACTGTAGATCCAATCCGTTGAATTCATATTAAATTTTAAGGCTAAAAAGTTCATTCTACGGGACTAAACTACGACACATAGAAGTTTCTATGACCCATAGATAGATTCGTAGAAATCGGACCCTAAAATCTTACTATCTAAAGTTTTTGCATGAGTTGAAAGTAAGGGTTGTAGAAACTTCTACAG	51
	miR8028-3p	miR8028	GTTCATAATTATAGTATAAGGATG	CTACTAATTACCTGTCCAACCAAACAGGACAGACAATGTAATTACATTCAATTACACCAAATCCAATTACCAGGGTGTCCTTCTAAACAGGTCCTAAGTATATTTTTGTTGTTTTGTATTTCCAACTTGAAGACAAGGCAACTTAGTATTGTCAGTGACACATTTTTTTAATTTCAGCTCTTAGGTTTTTAACAAAAATTAACAGAAGGATGTTTGTTGTCAAGTTTGGTATAGTTAAAAGATGTTTTTGTTCATAATTATAGTATAAGGATGTATACTAAGTTTGGGTTATACTTCAAG	273
	miR398b	miR398	TGTGTTCTCAGGTCGCCCCTG	TTTTTTAGTTTGATGATTTGTATCTCAACATGTGTTCTCAGGTCGCCCCTGTCGAATTATTTTTCACCTAATAAAATATGTTTGAAAACTTTGTCAGTGTAGACTTGCTAGATCATATTATATGTCTTAAGCTTAAATAAAGAAGGGGCAGATTATTAGCGAACATAAAACTAGTCGATTCATATGAATCCTCACACTATAGATACAGGTACAATGAGGATTTATATAGCTGATTTCAACTTGCTTGGTAGAAGGTTTAACCAAGGTGAGCTTCAATTACATACATTTGATTTGATTTGA	51
	miR8007a-5p	miR8007	ATGTGGCACTTTTCGGATTTTGAG	GATGTTAAACTAGTTTTTCTCTATAAAATAATCTTAATATTTAAAGTACATTAATACTAGCTCCTAATTGTAATTTGACTCTCAAAAACACTTTTTAAAAAAGATTAGTCAAACACAATTTGCTTAAAAAAAATATTTTTCAAATGAATTAGTCAAACACAAGTTGTTGTTTTTTTTTCAAAAGCACTATTCTGAAAAACTATTTTTAAAAAATGCTTCTAAAAATAAGTACTCCCTCCATCCCATTTTATGTGGCACTTTTCGGATTTTGAGATTCAAACAAGTCTATCTTTGATCTAA	273
	miR7981-3p	miR7981	ATAGGACTTTAGTTTAGTTAAGGT	TTATATATAAAATGAGTTCAGGGGGTAATAGGACTTTAGTTTAGTTAAGGTATGTCTCTGGAATTTCTATCATAGTCTAGGGGTACCTGTGCCTTCTCCCATTTATTTTAGTATAATCTTTTCTACAACTTAAAACACTACAACAAATTTGACTATCAAGGACAAATGATTTCGTCACTTATAAATCATAGTTCGTCACCAAAGATCTTGTGACGAAAAAAATTTCGTCAATCAGTCGTCACTAAAAGTATACAAAGACGATTTAGTGCATCGTCACTAACAAAGTTATATTAACTACAA	51
	miR156f-5p	miR156	CTGACAGAAGAGAGTGAGCA	CTGACAGAAGAGAGTGAGCATACACATATAATTATATAAATATTTTTACTTAATTTTCTTGATATATATTGTATATATAATTTTGCGAGTGCTCACTTCTCTTTCTGTCAATCTCTCTAGGAAGGGTCAAATGGTACATGAGTTAGATTTAGATTGTATTGTGAGATTTTTTTGGTTTCAATTGTGTTAAAAGGGAGAAATGCTATGAGTCAAACCCTAGTGGAAGAGGATCGGATTGGCCTAACCTATGGTGTACCGCCAGGTAGACTTACCAGTTTTGTTTTTTATTAGGGTGAATTT	20
	miR156f-3p_6	miR156	CTCACTTCTCTTTCTGTCAATC	CATCATCATTATATAAAATACTACTACTATTTGACAATTCAGATTGTACAAAAGTACCATTTTTTTTACTTATATAACATAGTCAAAATAGTTGTTATTTTAGTGGTTTTTTTTTCTCTTTGAGAGATCTGAAATTCAATGGCCATGGAAGAGAGGGACTGACAGAAGAGAGTGAGCATACACATATAATTATATAAATATTTTTACTTAATTTTCTTGATATATATTGTATATATAATTTTGCGAGTGCTCACTTCTCTTTCTGTCAATCTCTCTAGGAAGGGTCAAATGGTACATGAG	271
	miR10539	miR10539	CTTGGAACCACAGTTACCACC	GTGTTCAATAAAAGGAATCAAAATTGCATTTACACAAATCTAAGTTGAAGCACAAGAAGAAGAAGATGGTAGTTTGTTGGTGATTGTGGTTCCAAAATTGTTGTTGGTTATCCCTTTCTATTAGCCTGATATTTCATCTGTTTCAATTTGTTTGTTATACTTTTTTTTATAGTCTGTTTCGACATTTATCAATTTAAATTTTGAATTCGCCTCTATGTAACGTAGATATATTAGACACAACATTCCAATCTTGGAACCACAGTTACCACCATACTATCAAATTTCTCAGCCAAGATTCAT	270
	miR7122-3p	miR7122	ACAGCGTTTCTCTGTATAACC	GCAACCCCCCGCTCTATTTTAATTTTAAAAAAACCGACTTCAACCCACCCCGCATCTCACCCGCTCCACTCCACATGGCCTTAAACCCACCCCGCCCCTTTGCTTATAAAACCTTTTGAGTTTGCACACAAAACCCTATTACTATTACTTGTTGCTGCTTATGTTGGCCCTTACCACTAAACCCTATTGCTTGTTGCTGCTTATGTTGGTCCTTACCATTCTGTTATACAGAGAAACCGCTGTCGAGTCTGATAAAAAAATTTGGTCTTCTCATGCTCCACAGCGTTTCTCTGTATAACC	300
	miR7122-5p	miR7122	TTATACAGAGAAACCGCTGTCG	TGCTGCTTATGTTGGTCCTTACCATTCTGTTATACAGAGAAACCGCTGTCGAGTCTGATAAAAAAATTTGGTCTTCTCATGCTCCACAGCGTTTCTCTGTATAACCAAATGTTTTAGGGTCATTATTCTTTTCTGGATCCTCAACCCTTTGCAACTTTTTTGACGTCCTGGTAATGGTATCATTAAGAAAAAACATTCTTTTTTCTCAATTGCTGTATGTTTACTTGCTTTCGATTGAAATCTTGAACACTAGTGTGATGCTATTTTCATATGCATATGATATTTATTCTGTTATTAGTC	51
	miR7984a	miR7984	ATACCGAACTTTGGAAATGACCTT	ATACCGAACTTTGGAAATGACCTTTTATCCCCCATGCATTATTTAATAGTGTATTTCAAAGGTATACATGTTCCTACATGGACATCATAATTATTACATCATTATAAATAATAATGTGTTCATGTGGGCACATATATACCTTTAAAATACACTATTAAATAGTGCAGGGGGGTAAAAGGTCCTCCATAAAGTTTGGTATCCTAACTGTTATTTCGGCCAAAGTTAGAGTATTTTTTAGACCCTTTTCCCTTAGATAAACAAAGCTTCAATTGGAAGATCACTGATTGTTGTTCTTATTTG	24
	miR8001a	miR8001	TCCTGGGGATTAGTATGAAAATTC	AGAAAACTGTGAATTATATGGGGATTTTCCTGGGGATTAGTATGAAAATTCGCAGAATTTTTTTTATTGCATTTGGATTTTTCTAATATTTTTTTTAAACATAAAGTTCTCTCACTTTATGAGACAGAATTAAGATATAATGAAAAATAGATATTACATGAAAAAATTATGATTAATATGAAATTTTCCTTGTTAAAGATCAATATAGACATAACAGTTATAATTCTGCCCAAATTTTAAATATTTTATTAAGGCATCTTAGTTTTGGTGTATATAACAGTAACATAAGTTACTAAACAC	51
	miR8031	miR8031	TTAGACACCTCAACTAAGACTTG	TAATTCAATTCCAAGTGGCGACTCTGAAAAATAAAAATAATCCCTAATTCAATATCGTCATTAAAATTGGAAAATCCCTATTCCGTCGTGCGTGAAAAAAGGGTGTGACAGATACATCAAATTAATACTAGATACATATAAAAGATACATGAAATTAAAATTAGATCATCTAAATAGATACATATAACAAATACATTAAATAAAGGCTTAAGTCATCGACCGCCCCTTAAAGTTGTCCGCATAATTTACTTAGACACCTCAACTAAGACTTGTACCTATTGAACACCTAAATTGTTCAAA	272
	miR171f_1	miR171	ATGAGCCGAACCAATATCACT	AAAAATGTCCTTTGGTATGTTTTAACAGCTTATTACTAATTTGTTTGCAGGAACCCGTGAACCATAAATATATATATATATATATATATCTTCTACAGTAGCGTCAGATTCCTTTGCATGCATATAAAGAGAGGCATCGCAGCGACGACCATATCCAGAGCAACAAATAAATAATTAAGTGATGGAGAAGTAGACATGGTGTGATATTGGTTCGGCTCACTAATTTCTGATTCATGAAACAGATTAGAGATGAGCCGAACCAATATCACTCTTGTATTCTTCTTCATACGTACGTACAAT	270
	miR1886i-5p	miR1886	ATGAGATGAAATTAGCGTTTGGAT	TCCGGTTTTATATTGCAATATAAAATTATGAGATGAAATTAGCGTTTGGATATGTGATTTCAAGTTGATCAAATTCTCCAAAAAGCATGATTAGGGATTTTTCAAATACAAAAATTGACTCACAAGTTTATAATTTGTAAAAATAACCCCACATTTATGTCTACTAATATTTTATTTCACATGTAAATAAAATTTATAATTCATATCATTACTTTTTGAATCATTTATATCTCATATAACGATTATTCTCAACAATATAAATTTATTTTACTTCAAATACATTCCAACTTTACCATATAT	51
	miR8041a-3p	miR8041	ATGATGTATAGCAAAGAGCCT	ACTTCAAAATATCGTGATATTGAGAATTCAATGATGTATAGCAAAGAGCCTATCACTCTTGAGCAAGTGCGGCAAGCACTTAACTCTTGTGATGTGCGGATGCATTTTGAAGGAGACAAATGTGACGAAGCTAGTGGGCTCTTTGTGAGAGGTCGTACTAGCCAACAAGGAATGAGCAAATCGAAGTACAAATCAAAGTCTCGTGTGAACAAAAAAATGCGGAGTGTTGGGGCTATCACAAGAAGGGGTACTTTTAATGAGATTGCCCTATGTTAAAGTCCAAAGAAAAGGCGATGTATC	51
	miR5303c	miR5303	TTTTGGAGAATCCGACACGCACCC	CCCATACACTTCCTATGCTATTTATACTCTTACAAAGCCATTTGAGAATGAAGTTCAATTTTACCTCTTGGTGGCAAGAACCTGAAGTTGGTACTCTTAGTGGTTTGGTTGGGCTTAAAAAAAAATATGATGTTTGGATTTAGGATTAGCTTTAGGATGTTGGAATAAAATAAAAGCTAAAGAGCTAAGTTGCGCGGACTCTTCACTTTCGATGCCGCACCGGTGTCGGATTCTCCAAAAATACATTACTTTTGGAGAATCCGACACGCACCCATTGACATTTTTGAAGAGTCCGAGCAA	273
	miR156i-3p_1	miR156	GCTCACTGCTCTATCTGTCATC	CTGTCACCCCCTACCATTTTCTCTACCTCTCTTTAGGTTTGTTTATGTGTATTCGTGATTTTTGATTGATATATTAATTGGATTAATTCATGAGCTTATACTCTAGGCTTTTGACTCCGCTTTCCTCTATTTTCGTGTTAAACCTACAAATTTAATTAAGTGGGAGGTAAAACAAAAAGGAGGTGACAGAAGAGAGTGAGCACATATGGTGTCCTCTTGAATGATGTTTATATGCTTGAACCTATGTGTGCTCACTGCTCTATCTGTCATCCTCATCTCTTTCTCTATCTCTCCCTAGAT	271
	miR156c-3p_1	miR156	TGCTTACTCTCTATCTGTCACC	AAAGGCCGTAAGACTCTCTATCATTCCTCACACATCAAATCCCAACATAAAATAAAAAGCAATTGTTCCTTTTCTATTGAAACAATAGCCACATCAAGCTAGGGTTCTTTCTTAAAAATGTCTTCTGGAGATCGATCAATCAATTGAATCCAAAACTAAGTTTTAAAGGGGTAATAAATAGTGGTGACAGAAGAGAGTGAGCACACATGGTGTTTTCTTGCATGATGTTTATATGCTTGAAACTATGTGTGCTTACTCTCTATCTGTCACCCCCACCACATTCTCTCTATTTACATTTTG	271
	miR156a	miR156	TGACAGAAGAGAGTGAGCACA	CGACAACCAGTATATGATCAAAAGGAGCGGTGACAGAAGAGAGTGAGCACACATGGTGTTTTCTAGCATGATGTTTACATGCTTGAAACTATGTGTGCTCACTGCTCTATCTGTCACCCCCCATTGCTTTCTCTATCTCTCTCCACATTTTATTAGATTTACTAACGTTTTCTTGATTCATTCGCATTTTCGTGTAATTCTCCAAAAAATTCTATGATTGGGCTTTTTTTTCTTGGGGTGCAGGGGAGCGATTCACTAGCAAAAAATTTTGACGAGAGGGAGTTGCTCGGATAGTAAGCA	51
	miR156l-3p	miR156	GCTCACTGCTCTATCTGTCACC	CCCCCCCTCCCCCACCGCTTTCTCTATGTCTGTTTACATTTCTTTATATTTATTCATGATGTTTGATCATATTAATTTATTGGATTAATTCATGAGCTTATGCTAGGCCTTTGGCTTTGCTTGTCTCTATTTTTGTGTCAAGCATACAAGTCTAATTGAGTGGGATGTAAAACAAAAGGGAGGTGACAGAAGAGAGTGAGCACACATGATGTTTTCTCGCATGATGTTTATATGCTTGAAACTATGTGTGCTCACTGCTCTATCTGTCACCCCCTACCATTTTCTCTACCTCTCTTTAGG	271
	miR156a-5p	miR156	TGACAGAAGAGAGTGAGCAC	TGACAGAAGAGAGTGAGCACACATGGTGTATTCAAGCATGATGTTTACATGCTTGAAGCTATGCGTGCTCACTGCTCTATCTGTCACCCCCCCCCCTCCCCCACCGCTTTCTCTATGTCTGTTTACATTTCTTTATATTTATTCATGATGTTTGATCATATTAATTTATTGGATTAATTCATGAGCTTATGCTAGGCCTTTGGCTTTGCTTGTCTCTATTTTTGTGTCAAGCATACAAGTCTAATTGAGTGGGATGTAAAACAAAAGGGAGGTGACAGAAGAGAGTGAGCACACATGATG	20
	miR156g-3p_3	miR156	GCTTACTCTCTATCTGTCACC	AAGGCCGTAAGACTCTCTATCATTCCTCACACATCAAATCCCAACATAAAATAAAAAGCAATTGTTCCTTTTCTATTGAAACAATAGCCACATCAAGCTAGGGTTCTTTCTTAAAAATGTCTTCTGGAGATCGATCAATCAATTGAATCCAAAACTAAGTTTTAAAGGGGTAATAAATAGTGGTGACAGAAGAGAGTGAGCACACATGGTGTTTTCTTGCATGATGTTTATATGCTTGAAACTATGTGTGCTTACTCTCTATCTGTCACCCCCACCACATTCTCTCTATTTACATTTTGT	270
	miR166h-3p	miR166	TCGGACCAGGCTTCATTCCC	ATCGTTTGATCAATCAATTTATTGAGTGATTTCGGACCAGGCTTCATTCCCCTCAACTCTACGAGTTTTTCATCGATATTGTGCCATCCAAGCACTAGAATCATACATGTTTTTGTCTATAGTTTTGTATATCTTGTAGATATATTATCTTGTGTATATCCTGTGGATATATATACTGCTACTTCTTCTTCCTCCTCCTCTCTTTACTCCAAAGTGAAATATTAGGAAAAATCCAAGATTTTGTTGAGGAGAATGTTGTCTGGTTAGAAATCATTCTTTTTGAAAAGTCAGTGGTGAATC	51
	miR8046-3p	miR8046	CGCTGAAATTTCGATCATAAT	TACAGATTTAAGGGGCATGATATGTTGGCACCTTTTACTGCGGCATGGATGATTGATATGGGACCTTTAGTTATAGATAGAGCGGAGGTTAGATTTTGAGTTTTATTTTTGTTACGAGTTTTAAGTTATATGCATTGTTAGTATAATTATTTTTTTTGGTTACCTGAGGCATAAGTAGCTTCTGAATTATGATCGAAGTTTCAATGACATACTTTAATTTAATAGGGTCCTAATTAAATTAAGTTGTATCGCTGAAATTTCGATCATAATTCCGGAGATATTCATGCTTTATCCCTTAAT	270
	miR8046-5p	miR8046	TATGATCGAAGTTTCAATGAC	TACAATTTTTATTTTTGTAATTTTACTGATATCTAGTTAACAAAATATGTACACGTTTTATTTACAGATTTAAGGGGCATGATATGTTGGCACCTTTTACTGCGGCATGGATGATTGATATGGGACCTTTAGTTATAGATAGAGCGGAGGTTAGATTTTGAGTTTTATTTTTGTTACGAGTTTTAAGTTATATGCATTGTTAGTATAATTATTTTTTTTGGTTACCTGAGGCATAAGTAGCTTCTGAATTATGATCGAAGTTTCAATGACATACTTTAATTTAATAGGGTCCTAATTAAA	270
	miR171a-3p	miR171	TGATTGAGCCGCGCCAATATC	AGTACTTGAGAACATTTTGAGTCTACTTTTTGATTGAGCCGCGCCAATATCACGTGTAGCTAAATTTTTAACTGTCCATATATGTATATATGTACTTTGTACTACATCAACATCAAGTAGTGAAGAAGTACAATTTTTTTGCCTTTTGAGGTAAAAAAAAAATCACTGGTAAATTAAATTAATTGATCTTATTGCTTGATTTTAAAAAAAAAAGAATTTCATTTGTTTGTTCTTTATGTCTATCTGAAAATTGTGTTGGCTATTCTAGAGTTGATAATTATTTTTATGTTAGTTCTTGTT	51
	miR156a_2	miR156	TGACAGAAGAGAGAGAGCAC	TCTCAGGCTCGGATGAACCCCAGGAATTAGTTGACAGAAGAGAGAGAGCACGAGGAAATTCCGGTCCTGTAACCATATTGAACATGGATTCCTTGGCACCTGATAGAGAAAAGAAAAACTAACATACTTAGAGATGGAATTCTACTATCTTGCACTTTCAATCAGTTTCCTACCACTCAAGTTCCTCCCTACTTTTCAGCATTCTACAATTCTTTGTAGTGAACATATTAAAGAGCAACTTTTCAAAATTCAAGAGGACACGCATAGCAGCATTTCAAATTTTCAATCTCCTTTTTTTTC	51
	miR166g-5p_4	miR166	GGAATGTTGTTTGGCTCGAGG	TATGACTTGCTTTTGTCCTTTCTTTCTTTCCTCTTTCTATATTTATTATAACCCCTTCCTTTCTTTAATTCACTCATTCATTCTCACACAACATACTCACTATATTTTCTTTCTATCTACCAAAATAACTTTAAATTCTCTTCTCCACATATTTGCATACTAATACAATTCACAAACACAATATGAAGAAAAAGAAGAAGAGTGATGAGAAGAGAAGGAGGAATTAGCAATTTTTGTTTAATTTTGAGGGGAATGTTGTTTGGCTCGAGGCCACCAACTTCATCTAATGTAAGCAACTCT	270
	miR8034	miR8034	TATGACAAACACTGCAAAAACT	TTTTATGATATGTCAAATCAATATAATTGTATGACAAACACTGCAAAAACTTCATAAAGAGATAAAAACGTAAAGTATTCCTCTTTATTAAGTGGAACTTTTTCTTACACTTTATAAAGTGTAAGAAAAAATTACACTTTACAAAGAGGAATAATTCACGTTTTTATCTTTTTATGAAGCTTTTGCAATGTTTGTCATACAATTATATTGATTTGACATATCATAAAAACGGAAAAAACTATTACAATATGTATTTTTATTTTTTTATACTGAAAAATCCTCCAATCTCTATTTAAGGAG	51
	miR8155	miR8155	TAACCTGGCTCTGATACCA	AAGATACCAATTAATTTTTCCCAATGAAATATTAACCTGGCTCTGATACCAATTAATTTGGGCTGTCTTAAACAGGGTTGCGGAATTTTAATTACTGTTTATGCAGTAAATACTTTGTAAATTTTTAAAATTGATAGAGCATTTTTATATTCAAAATACTCTTGAGCTCTATACCTTTTCATTTCATTTAATGAAAATACCAAGGTTTCATAAGGAAAACTAGCATATTTGTATACTAATTCCATTTCTCTGATAGCTCTATCCATGTGGAATAAGGCTTTTTTATGCCCCCAGGCCCTG	51
	miR167a	miR167	TGAAGCTGCCAGCATGATCTAA	CACTACTTACACCGTGCAGCACTAGCAGTTGAAGCTGCCAGCATGATCTAAACTTCCCTTTTTAGTTCAAATATGATATGAGGAAAGATCAGATCATGTGGCAGCCTCACCTGTTGATGCCATCACGAATTATTCATCATATATTCTTTGTTTTCAAGAAACCTTCCTTCCATTTTGTTTGATCTTGTCCTTTTCATTATCTAATCCAAAATATCAAAGAAGAATTCAGACATGTTTATCAATTGGTCCACACATCATCAGAACTTGATATTGATGAAGCTACTTGAAACTTGTAAGTAG	51
	miR167a-3p_5	miR167	GATCATGTGGCAGCCTCACC	AAAAATTATGATTCCATCACTAATTGCAGCGTGGACCACTTCCAATATCCTAAAGTACTTAGACTTGTATAAATACATCTCCTTGGTTCTTCCCATCCACGTCAATTCTGAACCCTGGCCTATTTATACAACTCGGGCAGGGCAATTAAACTTATAGATAAATTCTCTTGTCAGAATTTCTAGCTCTACCACTACTTACACCGTGCAGCACTAGCAGTTGAAGCTGCCAGCATGATCTAAACTTCCCTTTTTAGTTCAAATATGATATGAGGAAAGATCAGATCATGTGGCAGCCTCACC	300
	miR6149-5p	miR6149	TTGCAACACACCTGAATCGTC	AGCTATTTGATAGCCTTTGTATGTCAAAGATTGCAACACACCTGAATCGTCAAATATTTTTTAATATATATTTGTTGATTCAGGTTTGTATGCAAACTATGACATATTTTAAAGGATGATGTATACAGGTCTATTTCTTAATGGTGAGATTTGAATTTTAATCTTTTGTAATTTTTGTATTTTTGTTTTATTAATCGTTAGATCATATTATCGAGTCTTAAATCCACTCTATTTCAATTGACAGTACTCTCATTTTTCTAAACTACCGTTTTTTTATTTCTTTTTTGATGTTTTTATGTT	51
	miR8045	miR8045	ATTGATAGTTGAGGTGTGTTT	TCTTACAACCTAGTGCATAAACAAGATTATTCCATGATTGCAATCCTTCTATGTAAATAGAGTTGATGGTAAAAAAAAACCCTAAAGTATCCCGGTTTTTTGGTTTTTTGAGTTTCATATCTGAACTATTATGTGTGCGAGTTGTCTACCAGAACAATCACCAACTATTTATCGAAACACACCTCAACTATCCATCGTTCCCTTTTCCTACCTGAAATATAACCATCATTCAGGTGTGTTTTGGGAACAATTGATAGTTGAGGTGTGTTTTGATAAATGTTGGTAATAAGTCAGGTATGA	270
	miR6149-3p	miR6149	TGATTCAGGTTTGTATGCAAAC	TCGTCAAATATTTTTTAATATATATTTGTTGATTCAGGTTTGTATGCAAACTATGACATATTTTAAAGGATGATGTATACAGGTCTATTTCTTAATGGTGAGATTTGAATTTTAATCTTTTGTAATTTTTGTATTTTTGTTTTATTAATCGTTAGATCATATTATCGAGTCTTAAATCCACTCTATTTCAATTGACAGTACTCTCATTTTTCTAAACTACCGTTTTTTTATTTCTTTTTTGATGTTTTTATGTTCGGATTTTATTTTGAATTATGAGATATTCATTCAAAAAAATAATTA	51
	miR393-3p	miR393	ATCATGCGATCTCTTCGGAAT	AACAACCTTTGATTCCACCAACACACCAAAAGCATGAATAGTAACATTCAAACTAAAGGGGTTGCACGAGGTTTGTGCAGTGCATTTCCCTTTTTCTCCAAATATATATCCCCTTATAAATATAAAACCTCACCAAATGAAACCATAACCTTTCTACGTCAATATGCAATTAATTCATAGTGCTGGTGGATTATTCCAAAGGGATCGCATTGATCCTGTGTCCCAAATTAATTAACTGGGGTCTATGGGATCATGCGATCTCTTCGGAATTCTCCATATTACTGGCTCTAATTAATCAAC	270
	miR399a_2	miR399	CGCCAAAGGAGAGCTGCCCTG	ATCACATAGGATATGCTGATTCTCTCCAAGGGTTTATACCGTCTCTTAAACTGAGAAGGAATGCCTATAAAAGCATTGAAAGCTCTGTTGTGGTGAACCAGAGGAAGAAGAAAACGAGAGTTGGTGAATGAAAATATATCCTTGAATTTATAAGCGAGACAGTGAACCAGAGGAAGAAGAAAACGAGAGTTGGTGAATGAAAATATATTCTTGAATTTATAAGGGAAACAATGATAGGGCTACTCTCTATTGGCATGCATTTGTATGTTTCAGCTGACACGCCAAAGGAGAGCTGCCCTG	300
	miR399i	miR399	TGCCAAAGGAGAGCTGCCCTG	TTTTCTGACCCTAGAAAAAGCAAGAAGACATAAAAATTGAAGGATATGCTGATTCTCTATGGGTTTATACCGTCTTTCAAACTGAGAAGGAATGATCTATATAAGATTGGAGGGCTCTGCTGTGATGAAACAGAAGTAGAAAAATGAGAAAAAAGAGAGTTGGTGAATAAAAATGTATTCTTGAATTTATAAGGGAAACAGTGGTAGGGCTACTCTCTATTGGCATGCACCTATATATTTAAGCTGACATGCCAAAGGAGAGCTGCCCTGTTACTGTCTCTGCTTAATGTTATTCTGATA	270
	miR399e_3	miR399	TGCCAAAGGAGAGTTGCTCTG	CATCAGCTTGATCAAATATTTGAGCTTACATGCCAAAGGAGAGTTGCTCTGTTACTGTCTCTAGAAGAAGCTTAGACTCTAGAAGAAGAAGAGGACGGACATTTTTATTCAATATGCATAAATTAAACCCTTCTTTCAAACTCTTTCTCCCTTTTAACCAAATGCTAATTGGGTCTGGATCCCAAATAAAACACTTCACCCGGCCCAATCTCGTTCATCACTTCTAACTGATCATACGCCCTTACAGAGCTAACTTAGTTCATAACATTGTGCCACCCAGCTGGAAATTTAGTTTCAAGT	51
	miR393a	miR393	TCCAAAGGGATCGCATTGATC	TCCAAAGGGATCGCATTGATCCTGTGTCCCAAATTAATTAACTGGGGTCTATGGGATCATGCGATCTCTTCGGAATTCTCCATATTACTGGCTCTAATTAATCAACGACTGATCGAGGATCTAGTATCAATAAATTCAGAACGAGTATGATTTATATAGTTCGAATTGAACTCCTTGCTAATCGTACAAATACTCCGAGGTGAGATTAATTTCATAATTTCTTCACTTGAGCACTCATATGTGTACTATTGTTATTTTGTGTAATCTAATTAAAAGTATTCCTCCTAATTCTTTTCACTT	21
	miR393a-5p	miR393	TCCAAAGGGATCGCATTGATCC	TCCAAAGGGATCGCATTGATCCTGTGTCCCAAATTAATTAACTGGGGTCTATGGGATCATGCGATCTCTTCGGAATTCTCCATATTACTGGCTCTAATTAATCAACGACTGATCGAGGATCTAGTATCAATAAATTCAGAACGAGTATGATTTATATAGTTCGAATTGAACTCCTTGCTAATCGTACAAATACTCCGAGGTGAGATTAATTTCATAATTTCTTCACTTGAGCACTCATATGTGTACTATTGTTATTTTGTGTAATCTAATTAAAAGTATTCCTCCTAATTCTTTTCACTT	22
	miR399a-5p_3	miR399	GGGCTACTCTCTATTGGCATG	AAAACCACAAAATGAAATGGTAAAAGGGATACGAAAGTTCCCCATTTTCTGACCCCAGAAAAGCAAGAAGACACAAAAGGGGCAGGATATGATGATTCTCCATGGGTTTATACCGTCTCTTAAACTAAGAAGGAATAACCTATATAAGCTTGGAAGGCTCTGGTGTGATGAAACAGAAGCAGAAAAATGAGAAAAAGGAGAGTTGGTGAATAAAAATTTATTTTTGAATTTATAAGAGAAACAGTGGTTGGGCTACTCTCTATTGGCATGCACCTATATATTTAAGCTGACATGCCAAAG	270
	miR399g-3p_1	miR399	CGCCAAAGGGGAGCTGCCCTA	TTCACCAAATGGAATTGTAAAGGGATAAGAAAGTTACTCCCATTTTCTGGCCCTAAAAAAAGCTAACACAGGCTATAGCATAAAAATCACAGGATATGCTGATGCTCCAATGGTTTATTCTGTGTCTTAAATTGAGAATGAGTGCTCTATAAAAGCGTGGAAACGCTCTTTTGTGATGAATCAGAAGCAGAAAATATGAGAAAGACGAGTTATTATAAGTGAAACAGTGATAGGGCTACTCTCTATTGGCATGCAGTTTGTCACACATTTCAGCTGACACGCCAAAGGGGAGCTGCCCTA	300
	miR393-5p	miR393	TTCCAAAGGGATCGCATTGAT	TTCCAAAGGGATCGCATTGATCCTGTGTCCCAAATTAATTAACTGGGGTCTATGGGATCATGCGATCTCTTCGGAATTCTCCATATTACTGGCTCTAATTAATCAACGACTGATCGAGGATCTAGTATCAATAAATTCAGAACGAGTATGATTTATATAGTTCGAATTGAACTCCTTGCTAATCGTACAAATACTCCGAGGTGAGATTAATTTCATAATTTCTTCACTTGAGCACTCATATGTGTACTATTGTTATTTTGTGTAATCTAATTAAAAGTATTCCTCCTAATTCTTTTCACT	21
	miR399j-5p	miR399	GGGCTACTCTCTATTGGCATA	AATCTTGAATTTATAAGCAAATCAGTGATAGGGCTACTCTCTATTGGCATACGGTTATATGTTCATCACATATTTCAGCTGATACGCCAAAGGAGAGCTGCCCTGTTACTGTCTCTGCTTAGTGTAATTCTGATGCAAAAGTTGTTAAACCACTGCTTATGTACCGTATCCGCCAGTGGTAAGTCCTACATCTGAATTATTCTTCTCTAAAAACTGAAACTATATTTTTCGTAAGGCATAAGTACCCCCAAGACTATGACCGAAATCCCATAGACACGCCTTAACTAAACTAAGGTCATG	51
	miR8004	miR8004	AGGGGTTGTGTATGTGTTTGGCCT	AACACTCTTAAAAAGAAATTATTATTTTTTAAAAAGAATTATTTTTTGTTAATTTTTATTTTTTTTAACTAAAATTAATTGACATGTGTCGATTTAAAATAAGCAGTTGCATTTGAAGAATATATATAAAATAAAGAAATCATAAAAATAGTATTTCGTGTTAAAATGGAACAGAAAAAATGGAGTTCAAGGGTTAAAATGGAACAAGGCTAAGTTGGAGTGCCAAAATGAAAAATGGGGCCAAGTTTGAGGGGTTGTGTATGTGTTTGGCCTTAATTATAAGTGTATAGGACGGAGAGA	273
	miR4995	miR4995	AGGCAGTGGCTTGGTTAAGGG	CTGCACCATAGATGGAGAAAGTCCAATAGCCGAAAGCATCACTAGCTTACGCTCTGACCCGAGTAGCATGGGACACGTGGAATCCCGTGTGAATCAGCAAGGACCACTTTGCAAGGCTAAATACTCCTGGGTGACCGATAGCAAAGTAGTACCGTGAGGGAAGGGTGAAAAGAACCCCCATCGGGGAGTGAAATAGAACATGAAACCGTAAGCTCCCAAGCAGTGGGAGGAGCCAGGGCTCTGACCGCGCGCCTGTTGAAGAATGAGACAGTGACTCATAGGCAGTGGCTTGGTTAAGGG	300
	miR8003	miR8003	ATTTCGGTATACAAATGGGATGAC	TAAAAATTTGTATTTATATATTTTGGTATACAAACTAAAACATAGTAATTGTATATAAACAAAATTACTACATATGTACAACACATATGTATACCGAATATACAAATAGACCCATATGTGTTGTATACAAATTAATTGCAGGACCCATTTGTATACCGAAATATACAAATAGACTCATATTTGTATATTTCAGCATACAAATGGGTCCTGCAATTAATTTTTATGCAACACATATGGGTCTATTTGTATATTTCGGTATACAAATGGGATGACAAAAAAACATGGAATGTTTGCTGTGAA	273
	miR8011a-3p	miR8011	AATAAAAAGAAGCCTCACACAACT	AAATGTTTGAAACATAATGTCTCAACATCATGAGTAAGAATGTTCGAAGAATTTATGTTTGAAACATTATGGAGATGTTTAATTATCTTGAGAGATGTTTTGGTTGTTTGTGAGAAACTTTTATTCATCAAATTACATGATAAACTTTGTTTTGTGTCTCACACAACTAATGTAAGTTGTGTGAGGTTTCTTTTTGTTTCACAAAGCAGAGCGACCCAAATCTTCCTCTTTGGGTCCACCAACTTGTGAAATAAAAAGAAGCCTCACACAACTTGTGTTAATTTTGTGAGTCACAAAGTA	273
	miR6026-3p	miR6026	TTCTTGGCTAGAGTTGTATTGC	TGAGGCAAAAAAAGCTTATGAAGCAACCTAGTTGAATGTTCAAATCAATTGACCACTTTTATTTGGTAATACAACTATTGCCAAGACAATGCTTCATTATAAGTGCATAACTTTTCACTTTATTGTTTGAGCATTGTGTTGATTTCTCTAACTTATTTTTCTTTGAACAAAATTGTTTTTTCATCGCGAAATGCAACACCATGCTCAGAAGTTAGAGAGTGAAATGCTATGCATTTGTAATTATATATTTTCTTGGCTAGAGTTGTATTGCCAAGTCAAGTGTTTTAATTGATTTGAACC	271
	miR8011a-5p	miR8011	TTGTGTGAGGTTTCTTTTTGTTTC	TTGTGTGAGGTTTCTTTTTGTTTCACAAAGCAGAGCGACCCAAATCTTCCTCTTTGGGTCCACCAACTTGTGAAATAAAAAGAAGCCTCACACAACTTGTGTTAATTTTGTGAGTCACAAAGTAAATTTCCAAATCCACTCTTCTTCATATATTTCTGACACATTTCTAAGTAGTAGAAAATTAAAAAAACAAGACCAAGAAAGAAAATATTGTACTTGTAAGAAAATTAGAAGGAAGATAAGAGATGAAAATTTGAAATGATTTAAACGTGGTAGTGCAACTTTTGTAATATTAGGAGT	24
	miR6026-5p	miR6026	AATACAACTATTGCCAAGACAA	AATACAACTATTGCCAAGACAATGCTTCATTATAAGTGCATAACTTTTCACTTTATTGTTTGAGCATTGTGTTGATTTCTCTAACTTATTTTTCTTTGAACAAAATTGTTTTTTCATCGCGAAATGCAACACCATGCTCAGAAGTTAGAGAGTGAAATGCTATGCATTTGTAATTATATATTTTCTTGGCTAGAGTTGTATTGCCAAGTCAAGTGTTTTAATTGATTTGAACCTTCGAGTGAGTTGCTTCATGATCTTCTTATGCCTTAGCTTCAGAACTTACCACTATATCATCAATTC	22
	miR9475-5p	miR9475	AACGATCTCTACATTGTAGGC	CTTCATCTTCTCCAATGAGTAGCGATCAGGAACGATCTCTACATTGTAGGCGAATCGTTCTATGAAGTCCTTAGCTAAAGCATTCCAGCTAGACCACTGTCTCGTTTCATGGGACGTAAACCATTCTAGAGCCTCTCCGCTCAGACTTCGACTAAAAAGCCGCATTAACAAAGCTTCGTCTCTCCCAACTCCCACGAGTTGGTCACAGTAGGCCCTCAGGTGTGCTAATGGGTTCCCCGTTCCTCCGAAGTTATCAAATTTCGGCACCTTGAACACTTCCGGGAGGTCCAAATTCGGATG	51
	miR6024-3p	miR6024	TTTTAGCAAGAGTTGTTTTCCC	GAAAAGAATAGACTACTGCACAATGTATATGTATTTTTGGTGGATGGTAGAGTAGGTAAGAATATTTGGGCCTCACGGGCACCCAGCGTGAATAACGACACTCAACTCAAATTCGGCCCGACAAAAAGAAGAAGGAACCCTCAAATCTGAATATAAAGGATATATGTGATGTGAGATAAAACCCTAGAACGACAACTCCGGCAAATTGGTAATGGGAAGTGGAGAAACAACACTTGCTAAAAGAAGTTCATCAGTGATTCTCTCTTCTTTTGGAGTTTTTTTAGCAAGAGTTGTTTTCCC	300
	miR6024-5p	miR6024	AGAAACAACACTTGCTAAAAGA	AACTCCGGCAAATTGGTAATGGGAAGTGGAGAAACAACACTTGCTAAAAGAAGTTCATCAGTGATTCTCTCTTCTTTTGGAGTTTTTTTAGCAAGAGTTGTTTTCCCTCTTCTCAATTCCGTCTCTCTCTCTCGCAGTCTCAGTACAATTCAGGCCACAACGGTCTTCGATCTGTAGAGTTTTGGGTCTTCTGTTTGCTTAGTTAAGAGTTATGTCTATATTTGGCGGTTGATATTTGTACATCGAACTTCATTTTTTTCTGTCTTTTTTGATATTTTTAGTAGTATTTCGTTTGGAGGC	51
	miR8012	miR8012	ATGACTTTAAGTCGCGTCTGGCCC	TCATACACATGATCCCAACTACCCAAATTAGGGTTGTTTCCACCATAGATTCTAGATAACCCCCCCCTCCCCACCCTAATCTATAATTACTTATTAGATTACGTTCTACGGATCGAAAAATGGATTCGGGGAGTTAAAATCTTACCTTTAGCCTCAAGAATGGTGGAAAACCATCAAGAAAAGACATGGGTTCGTTCCTTAGCTCTCAAATTTGAAAAATGTAGAATAAAATGTTTTTGAGGTTTATTTATGACTTTAAGTCGCGTCTGGCCCGCCACAAGGGTCCTCACCCCGCTACAG	273
	miR530b_4	miR530	TGCATTTGCACCTGCACCTTA	GTGTAGCTTACATCTTTTTGAGTCCATATCAAATCCCAAGAATTCACCACATCAATAATTATAAATAATACCAACACTCAATGCCACATATATGTGTGTGGGGAGAGGTTGTGAGAATATGAAGGCTCTTTCATGCTAGGCGTCCAGATCTATTATATTCGAGTCTTATTTTCATCACATTTACTATTATATTTACTAACGCTTCGTCCTAATGTAGACTTATTTCTATAAACAAGAGACATTTTTATCTGCATTTGCACCTGCACCTTAGTGAACGAATTTGTTAGCGTATAATTCATG	270
	miR530a	miR530	TGCATTTGCACCTGCACCTT	TGCATTTGCACCTGCACCTTAGTGAACGAATTTGTTAGCGTATAATTCATGCAGAAAGGTGTTGGTGCTCATGCAGACAAAAATGGTATCTTGGCCTTCCATTGGTTTCCCAATCTTTACCTTTCGAAGTTGTTGCACTAAGTGCAAGCATCGGTTGAACTTGTGTTGATGGGAGATAGCAGTATTCAACGAATTAATCGAGGTATAAGTTGACACTTATCTTTTTTTCTATAGTTAAGAAAATATTACTTTAGTAGATTTAATTTGCTCATCAAGATTCTTATTTGATTTTTCATTGCA	20
	miR845d	miR845	TGGCTCTGATACCAATTGATG	CTGAACATGCCCTATCCGTTGAAGATTCTGCTCTTCCGAGTTCCTTTTATTTTCCCTTAATTCCCAGTCGGCCAATGGTTTCCTTAATCTCATACAATTCTTTTCTGTTTGCAAATTCCTATCGTTCATGCTAGTCATCCCTTCCATCAGTTTCGTCAACTGATCTTGGATCTGGGCTAATCGATCATCCATCTCTTCCACTAATTTATCTTGATTCTTTCTTCTAGTCACCTTCATGCCAAAGACCACTGGCTCTGATACCAATTGATGCACAATGGAAGTCAATTAAGCATCAACTAA	270
	miR162-3p	miR162	TCGATAAACCTCTGCATCCA	TTTGTTGAAATCAGATCTGTGATGATATATGTTTAGACCCACTATCTGTTTGAATTTTATATATAGATTTATACTCGGTATTGAAAATACTGGATTCAGATAAATCTATGCATTCGCCTGTGGATATCGTTTGAGTATTTTGACGCACTCTGTATTTGTTTAGTTGGTTGAAGACACTGGAGGCAGCGGTTCATCGATCTGTTCCCTGAAAGCTGAATATATATGCAAAAATACAGCAAAAGGAACCGATCGATAAACCTCTGCATCCAGTGCTTAACCCTTGCTAATTGGTCTGTTTAT	269
	miR8008b	miR8008	AAACCCAGAAAAGCGACGGACAGT	ACACTTTATAAGTTTTTGTATTGTGATTTCTTTAGTTTTGAAGATTGATTTAAGTTTGATGTTGTATATGTTGTGTGTTTACATTATATTGTTTGTTGGGCTGCTTGTATATGAATTGAATTGAATTGATTGGTTTGTATTTGCAGATGGGCAGCAGAAACTGCCTATTTCTGCTGTAAAAAAGTTGCAGAAAAAAGTGACGGACAGGGTGGTTTTGTCCGTCGCTTTTTTGCATTATTTTTTTCAAATAAACCCAGAAAAGCGACGGACAGTATCCTTTTTTGATTTTGACCAAAAAAG	273
	miR7993b-5p	miR7993	TTAAGTTAACCACATAAAATATGT	GTGTGTCCTCATTCGTCTGTTTGGTAATTAAGTTAACCACATAAAATATGTCATCTCCTTTAATTATACGCATCTGTCTTAATAAGCCACATAACCTCAGACATTTTCTACTTAAGGTTTATGCATACAATTAAATGAGATGTTATATTTTATGTGATTAATTTAACCACCCTATAGACAAATAAAAATACACATAAATATTTTTATTCAAAAATATGTAGTTAAAATACTTAGTTTGATTAATGTCTAAGTGGAATAATATGACAAGTTTAAGGATTTGACCATGTAAAATGGAAAAAT	51
	miR1886i-3p	miR1886	TTTACGTTGATTTCATCTCATGA	TTGTGCAGGCTTTATCCATGGCCAAAAAAATGTTGCATGATCGAGGTTATGATTGGAGCGGCAAAATCTATGAGAATGGAATAATGCTTAAATTAGTAATTGATTTCTTATGAAGTATATTTGTATGATGATAAAGTTAAATTTACTTTGCCACTTTTATTTGATTCTTTATATTAAGCAGGCATTTGACCATGTGTTGTTATATTACGATATGAGATTGTAAGATCAAATCAATGTTTGGGTATATAATTTACGTTGATTTCATCTCATGATTTTATATCATGAGATGAAATTTTATAT	272
	miR8014-3p	miR8014	ATGAATACAATGTTTGGATAAATT	ATGTGGACCATTTAGAGAAGATATGAGATGACGTTGAACAACATTCTAGAGGTTGAAATATTTGACGTATGGGGAATCAATTTTATGGGCCCCTTCCCACCGTCTAATGAAATCCAGTACATTCTATTGGAAGTCGATTATGTGTCTAAGTAGGTTGTAGCTCTTCCCATCAATCATTTGAACGTTGCAATAAAGTTCATTAACACTTTGTTTGGATGGTTGTTACGTATTGTTTCATATTGTATTGTATTTTATTGTATCATACTGTACTGTTTAATGAATACAATGTTTGGATAAATT	300
	miR172b-5p_4	miR172	GGAGCATCATCAAGATTCACA	GGAGCATCATCAAGATTCACATAGCTATATTAGGGCTTTTATAATTTTTAAAAGCCCTATGACGATGTGTGGGAATCTTGATGATGCTGCAGCGGCAAATAATGACTAATTTTTTTTTTACTAGAAACAATTTTCAATATTCATGAATCCAGATCGTTTGATATTGTAAGTATTTAATATCTTATCTTATAATTTACATTAAAATACATATGTTTGATTTTTCGTTAAAGGAGGTTTGGATGAATCATCTTTTGACCCTCTAGAAAAGATTAACATTGTAGATCCGCCTTTGAAACGAAT	21
	miR172j	miR172	GCAGCATCATCAAGATTCCCA	TAAAAAAAAAATTAGTCATTATTTGCCGCTGCAGCATCATCAAGATTCCCACACATCGTCATAGGGCTTTTAAAAATTATAAAAGCCCTAATATAGCTATGTGAATCTTGATGATGCTCCACCTGCAAAAAATTGACTTGGAACTATATCATCACGATCTTTATCGATACAATTATAATGATAATAACATATTAAATGTAACTCGAACATGAAAATAAAAAAGGTACTTGACCAAAACCCTAACCCTAGGAAAATATTGAAAGGGAGAAATGGAAAAAAATAATAATATTGGAGTGGTGA	51
	miR172g-3p	miR172	GGAATCTTGATGATGCTGCAG	ACCACTCCAATATTATTATTTTTTTCCATTTCTCCCTTTCAATATTTTCCTAGGGTTAGGGTTTTGGTCAAGTACCTTTTTTATTTTCATGTTCGAGTTACATTTAATATGTTATTATCATTATAATTGTATCGATAAAGATCGTGATGATATAGTTCCAAGTCAATTTTTTGCAGGTGGAGCATCATCAAGATTCACATAGCTATATTAGGGCTTTTATAATTTTTAAAAGCCCTATGACGATGTGTGGGAATCTTGATGATGCTGCAGCGGCAAATAATGACTAATTTTTTTTTTACT	270
	miR172b	miR172	GGAATCTTGATGATGCTGCA	ACCACTCCAATATTATTATTTTTTTCCATTTCTCCCTTTCAATATTTTCCTAGGGTTAGGGTTTTGGTCAAGTACCTTTTTTATTTTCATGTTCGAGTTACATTTAATATGTTATTATCATTATAATTGTATCGATAAAGATCGTGATGATATAGTTCCAAGTCAATTTTTTGCAGGTGGAGCATCATCAAGATTCACATAGCTATATTAGGGCTTTTATAATTTTTAAAAGCCCTATGACGATGTGTGGGAATCTTGATGATGCTGCAGCGGCAAATAATGACTAATTTTTTTTTTACT	269
	miR8036-5p	miR8036	GGAGGAATCGAAAGATATAAG	AATATGGGTGAAGGAGAGGTTATTGGAGTGGGAGGAATCGAAAGATATAAGGATTTATTTATTTTTTCAATTTGATTGGAAAAATAGAAAAAAAAAGAATTATGTCTTTCCGATGCCTCCCATTCCCATGGCTTCCGTTCACTTCTCCCATTCCTCATCTTTCATTCTGTTTGGTGAAATTCATCATATCCTCTCTGTTCTGAAGATTATATTTGTTATAATTGCTAATTTACTAGTTTTCATTGCCGTATTTCGTTGTTGTATTTTGGGGTTGATCTGTGATGATGAATTTTAAGGCTT	51
	miR482a_3	miR482	TCTTTCCTACTCCTCCCATACC	TAGGGTTTCAACCCCGTGTCTTGTTCCTCCCTCTTTTTTAGCTCTATATATTTGGGCAAACCATTACAGCAACAGCAGCAATACACACATCTCAACTGCAGTTAGAAATTTCTCATAGCTTCTTAGTTTTGAGCTGGGATTGAGTAAAATCCATGGAAATAATGATGGCGTTGAAAGGGATGAGAGTATTGGGAAGTTGTTGGTTGTGGGTGGGGTGGAAAGATTTGATGATCTATCTTTTTCCAAATCAAAATGGAAAAAATGGAAAAAAGATTAGATCTTTCCTACTCCTCCCATACC	300
	miR8036-3p	miR8036	TATGTCTTTCCGATGCCTCCCA	GGGGATGAATTTTGGTTACTGATGGCTTCTTTCTACATATTGTTAAACCTTTTTTTTTGGCTTTTCGTTTATTAGAAATTAAATTCGTTTTTTATCTTTGCTATTTTATGATTTAGTTTTGAATATTTCTGAAATTGAGGGAGAGGGAATTGGTAGTTGTCAGTGAAAGATGTATGTGAATATGGGTGAAGGAGAGGTTATTGGAGTGGGAGGAATCGAAAGATATAAGGATTTATTTATTTTTTCAATTTGATTGGAAAAATAGAAAAAAAAAGAATTATGTCTTTCCGATGCCTCCCA	300
	miR482e-5p	miR482	TGTGGGTGGGGTGGAAAGATT	AAGGGATGAGAGTATTGGGAAGTTGTTGGTTGTGGGTGGGGTGGAAAGATTTGATGATCTATCTTTTTCCAAATCAAAATGGAAAAAATGGAAAAAAGATTAGATCTTTCCTACTCCTCCCATACCCATGACTTCCACTAGCTTCTCCCTTTCTTCATGTGTCATCTCCTTGCTAAATTCATATTTTTTTATTATTTGATTGTTTAATCTTACTCTCTTAATTTCTCAAATTAGTATACATACCAGAACTTGGATCTAACCATAAACGAAAGTTGAAAACTTGTCATTCGAAAATTTAAA	51
	miR8032b-3p	miR8032	AGTGTGAGTCGGTGCGATTAGG	TGTGTCGTTTAGAGCGTTCCTATAGCGACCCCAAGTCATTTATGACTTGCTGGGACTGACAGTTCGGTCACCTGGTCGTTCGTTTGGTCTTGGTGCGAGTTTTTGTGTTTTGGAGCTTATGAACCTTGAACAATCATTTTCGATCAAAAGTTCAAGAAGATGACATCAGAATCCAATTCTAATGATTCCATCAGCTCCGGAGGGTCATTTTAGGCTAGTAGCATGGTCGACATGACTCTCGAGGTTTTCAGTGTGAGTCGGTGCGATTAGGCGTTTTAGCCTTTGAAATTTGGCTTAAGT	271
	miR166h-3p_1	miR166	TCTCGGACCAGGCTTCATTCC	GTGACCATATATCCTTCATCATATAAATGATCTCGGACCAGGCTTCATTCCCCTCAACTCAAGGTTTTGTTATAAACATTATCGAACCAGAAGCAGAACTGTAACTTCGTCCGTGATACATGCACTCTCTCTTTCTCTCTCCCAAAAAATTGGCAAGTAAGCTCCTTATATTAGTTCATTTGCATTGATGACAATATATTATTCTTGTTTTGATAGCTAAAGAAGAAGAGGAAGAAGAAGAGACAACAAGCCATTGGTGTTGATCATACTCGTTTGAAATCTGCATGTAATAGTAGAAAG	51
	miR166e-3p	miR166	CTCGGACCAGGCTTCATTCCC	TGACCATATATCCTTCATCATATAAATGATCTCGGACCAGGCTTCATTCCCCTCAACTCAAGGTTTTGTTATAAACATTATCGAACCAGAAGCAGAACTGTAACTTCGTCCGTGATACATGCACTCTCTCTTTCTCTCTCCCAAAAAATTGGCAAGTAAGCTCCTTATATTAGTTCATTTGCATTGATGACAATATATTATTCTTGTTTTGATAGCTAAAGAAGAAGAGGAAGAAGAAGAGACAACAAGCCATTGGTGTTGATCATACTCGTTTGAAATCTGCATGTAATAGTAGAAAGA	51
	miR1918	miR1918	TGTTGGTGAGAGTTCGATTCTC	GGTTTACTACTTAAACCGTCAGTTCAGTTTGTTGGTGAGAGTTCGATTCTCTACGCCTTGTAATCCTCCCCATTTCTCCTACCTCTTCCTTTTTTTTTGGCTTTTTAGTAGTTAGAATGATGCATAAAGAGGTGGTGTATAAAATTGCTAATATATTTATAACCTTTTTCTTACTCAATGTATGATGTATTTTGCAATAAAATTTAATATTTATAAAAAATAATAAATTGAAGATTTATTATTTATTGGCATAATATATAAACGTGTTTTTTAATCTGGCTTCAGCAGTGACAAGTGCTT	51
	miR166a-3p	miR166	TCGGACCAGGCTTCATTCCCC	GACCATATATCCTTCATCATATAAATGATCTCGGACCAGGCTTCATTCCCCTCAACTCAAGGTTTTGTTATAAACATTATCGAACCAGAAGCAGAACTGTAACTTCGTCCGTGATACATGCACTCTCTCTTTCTCTCTCCCAAAAAATTGGCAAGTAAGCTCCTTATATTAGTTCATTTGCATTGATGACAATATATTATTCTTGTTTTGATAGCTAAAGAAGAAGAGGAAGAAGAAGAGACAACAAGCCATTGGTGTTGATCATACTCGTTTGAAATCTGCATGTAATAGTAGAAAGAA	51
	miR8015-5p	miR8015	TATTGGATATTGAAAATGAAACTT	TATTGGATATTGAAAATGAAACTTTAGTTATCGAGATATTCAAACTAAAGTTTCATTTTCAAGGTCCAATAGCACCGCACATACCCTTACTTTAGCAAAAAAATTCACAACTCAGACCCCCTTACGGTAACTGCGGCTAGTAACATCAGCTAACTTTTTTAATGTCATTACAGTTTGTCGGAGAATTTCCTGACAAAGAAATTGGCCAGGTTTATAAAAAGAAAAAACATTGAAGTAAAAACAAAAGGATAAATTAGAATGGTATAGTTCTATCTCCATTTGTTTATGATCATCATAAGG	24
	miR8015-3p	miR8015	GTTTCATTTTCAAGGTCCAATAGC	TAAAACCTGGCCAATTTCTCTGTCTTAATCTTATACGACCATTTGCATTTTCGTTTCTCATGCATGTGTTCACAAATCTCAGGAAATTGTCTAGCAAACTGTAATGGCATTGAAAAAGTTATCTAATGTTACTGCCCGTAGTTACCGTAATGTGGTCCGAATTCTTGAAATTTTTGCCAAAGTAAGGGTTTGTGTGGTGTTATTGGATATTGAAAATGAAACTTTAGTTATCGAGATATTCAAACTAAAGTTTCATTTTCAAGGTCCAATAGCACCGCACATACCCTTACTTTAGCAAAA	273
	miR398a-3p	miR398	TATGTTCTCAGGTCGCCCCTG	TGTAGTAGTACTTTATAGACAAAGACATCATATAAAGAAAGATATTGTCCTAGAATTGAAGTACTAGTACTAATTGTAGTACAATGTGTACACCTTTTAAAGATCTATCTCCCCTTTATATATGTCTTCATGAATTCACATAAAAAGATGGAGTCAACAATATGTGGATGTGTTCAATAGGGTTGATTTGAGAACATATGTATGGGCATATTTTGTTTCTAACAATTTATTGTTTATAAATGTGACACATATGTTCTCAGGTCGCCCCTGTAGACTATTCTTCATCATTCAATTTGATAA	270
	miR398a-5p_1	miR398	GGGTTGATTTGAGAACATATG	GACTTGATTGATATATAACAATTATTTGTAGTACAAATAAGTGAAGTAGAATGCGTGGAGTACAATAGTTTGTAGTAGTACTTTATAGACAAAGACATCATATAAAGAAAGATATTGTCCTAGAATTGAAGTACTAGTACTAATTGTAGTACAATGTGTACACCTTTTAAAGATCTATCTCCCCTTTATATATGTCTTCATGAATTCACATAAAAAGATGGAGTCAACAATATGTGGATGTGTTCAATAGGGTTGATTTGAGAACATATGTATGGGCATATTTTGTTTCTAACAATTTAT	270
	miR5303	miR5303	TTTTTGAAGAGTTCGAGCAAC	AGCCTGTATGTTTTTCTTGACAAACTGTTTTTACCAAGTCTACTAGCTGACTTTGCTGTTTATGGCTCTTGACTTCTATATGCTGTTTACTCCCATTTTTTAGTTACATACTGTATGGGATTAGATTTCCTCGTTAGATGTTTGGCAAAAACACTTCTTCTAGAAGCTATGTCGCTCGGACTCTTCAAAATTGTTGCTGCACCCGTGTTGGATTCTTCAAAATGCACTACTCTTGTAGTATCCCAGACATTTTTGAAGAGTTCGAGCAACATAGTCTAGGAGTTCATACGAGAAAGTGCA	270
	miR10532	miR10532	AAGTGTGTCTCTGAGATTTCGGGC	ATTCCTATCATCTGAAATCACATAGATACCCATGTCTCTCCCGATAAAAGGGACCTAACTCCTGCAAGTAACACCATTATCACTGACACACAGAAACACTCGTTCTTCATTTTCTCTTTTCCCTTCATCCAAATAGCTAGAAAAAATTGTCAACACGCTGGCCCCAGAAGATAGTGCCATGTAGGCCAAAAAGGGTAGAAATTATTTATAAAATAAGTTCGGTGGGGTAATAGGACCTTAGTATAGTATAAGTGTGTCTCTGAGATTTCGGGCATAGATTGGTTGGGGGGGTACTTATGC	273
	miR8017	miR8017	ATCCAAGTGAAGTGTATCGTCTCA	GGAAAGAGAAGAATTAAAAACATATAATACATTTAATGAAATAAACAAAAACGATATGCTCACTGAAGTTTTCGTTACGGCAATGCACAAATTTATTGACTTTTGTGTTCAGAATATAAAAAGAGAGAGATAAAAGAGGAATAAAGTTGAGTTATAGCGTCCCGTATTAATTGAGGAATAAGATTGAATTGTTTACGCAATCAAATTATGGGAGGGTGCACCTCACTTAGATTTGACATTATGCTCAAAATCCAAGTGAAGTGTATCGTCTCATATTAATTAACAGATTGAATTATTATT	273
	miR482b-3p_5	miR482	TTACCGATTCCCCCCATTCCAA	TCATATATAGAAGTTATTGGACTTAAGTTAACAAAAGTAAGACATGCGTGGTTAAAACGTGTTTTGGGAACCTCATATTTTAGGGTTTCCATTCTACCGCCGCTTCTAGTCTCTATATAAATAAAATAATCTGAGTAGCAAGTACAATGAGTAAGATGAAGCTTTGTGAGGTGAGTATGTAGGAAAGGGAAAGGGGATGAATGTTTCAGGGAGCTTTTGGAGTGGGTGGCATGGTAAGATATCATATTTTGTTTTTCATAAAAAATGGAATTGAAATCTTACCGATTCCCCCCATTCCAA	300
	miR482b-5p_4	miR482	GGAGTGGGTGGCATGGTAAGA	GAAAGGGGATGAATGTTTCAGGGAGCTTTTGGAGTGGGTGGCATGGTAAGATATCATATTTTGTTTTTCATAAAAAATGGAATTGAAATCTTACCGATTCCCCCCATTCCAATGGCTTCCAGTCATTTCTCCCTTTCCTTTTTCTCCAGTTGCATAATAGGTTTCTTGGTATGCTCTAAATCCTTTATATGTGCTGTAGTATTGAGGATTTATTTTATTTTTGATATGTTTATGTGTAATAGCTCTGATTGTGTTGTTATCTGAATCTGGTATTATTTGAGTATTTTGCATGACCTGATC	51
	miR482c_5	miR482	TTTCCTATTCCACCCATGCCAA	TTTTTTTTTCTTTTAAGAGCTGTGATGAGATTTAGAGATTGTCATGCACCACTCTTACAAGTTTTAATTTGAGTGATGATAAATTTCTCATACCCATTTTGTTTCTGAGCTCTTATACATATATATATTTTTTAATATTATTATTATTATTTTAGAGGAAATTTTTGTGGGAAATGGAAAGGGAGGAGAGATTTGGGAAGCTTTTGGAGTGGGTGGGATGGAAAAATATCGTATTTATTTTTTTTCCTTAAAAGGCAAAAAAGATAAGAAATGAGATTTTTCCTATTCCACCCATGCCAA	300
	miR482d-5p_3	miR482	CGTGAGTGGTGGGGTAAGATA	AAGGGATGAAAATTTTTGGGAAGCTTTTGGCGTGAGTGGTGGGGTAAGATAGATCTATCATATTTATGATATGAAAAATCTTGCCTACACCGCCCATGCCCATATCTTCCAATTATTTCTCCCTTTCCATACAATTTCTTCTAGTTTTTTTTTTTCTTTTAAGAGCTGTGATGAGATTTAGAGATTGTCATGCACCACTCTTACAAGTTTTAATTTGAGTGATGATAAATTTCTCATACCCATTTTGTTTCTGAGCTCTTATACATATATATATTTTTTAATATTATTATTATTATTTTA	51
	miR482e-3p_1	miR482	TCTTGCCAATACCGCCCATTCC	TGAGTCGATGAGTAGAAATATCATCATTTATAGAAGTCATTGGAGTTAAGTTGACAAAAGTAAAACATGCGTGGTTAAAACGTACACTTTTTCCCTACTTTGTGAACCTCACTCATTATATTAGGGTTTCCACCGTACAACCTCTTCTCATCATCTCTGTGTGGAATGAGAAAAGCTTGTGAAATTTGTAGGAAATGGGAAGGGGATGAGTGTTTCGGGGAGGTGTTGGAGTGGGTGGTGTGGTAAGATTTCATATTTATTTTCCATAAAAATTGAGATCTTGCCAATACCGCCCATTCC	300
	miR482d-5p_5	miR482	GGAGTGGGTGGGATGGAAAAA	GGAAAGGGAGGAGAGATTTGGGAAGCTTTTGGAGTGGGTGGGATGGAAAAATATCGTATTTATTTTTTTTCCTTAAAAGGCAAAAAAGATAAGAAATGAGATTTTTCCTATTCCACCCATGCCAATGGCTTCCAATCATTTACTCCTTTTCCTGATACTCCTCCCGTTGCATGATCTGCTCTCGGTATTACGTAATTACGCTAATATTTACTTAATTTAACATTGTCAATATGAATTAAGAAATGTTGGGTAAATTGATGGCGTGGCTGTGCGGCGGGTCTCCTACCGTATTTCTTAAAT	51
	miR482e-5p_2	miR482	AGTGGGTGGTGTGGTAAGATT	AAGGGGATGAGTGTTTCGGGGAGGTGTTGGAGTGGGTGGTGTGGTAAGATTTCATATTTATTTTCCATAAAAATTGAGATCTTGCCAATACCGCCCATTCCTATGGCTTCCGATCATTTCTCTCTACCCTGTTTCTTTAGTTGTTGAATCTGTTGCATCGTAGATCTAAATCCTGTTGAATTTTTTTTCTTTTGTTCAGTTATGGAGATTTAATTTTGGTGATTGGTTTATTAGGAGTCTTTTGTGACATGTTTTCATGTGTTTCTACTTATACAGTTTAAATGATGTAAAATTTGATAG	51
	miR482d-3p	miR482	TCTTGCCTACACCGCCCATGCC	TCATATTTATTGTAGGTTAATTTGTAATTGTGGTGAACTTAGGAGGATACGATGGTAAACTCATAAAAAATTAGGGTTTCAATCCAGCGGCAACTTCACCATCTTTTTTGTACTATATAAACGACACCACCAACCAATTGATCAACAAACCTACATACAGCCGTTTACTCTCTATTCATCTAAAACTCCAGAAATTGGGAAAGGGATGAAAATTTTTGGGAAGCTTTTGGCGTGAGTGGTGGGGTAAGATAGATCTATCATATTTATGATATGAAAAATCTTGCCTACACCGCCCATGCC	300
	miR7997a	miR7997	ATGCTGCTCGGACTCTTCAAA	ATGCTGCTCGGACTCTTCAAAAATGTCTACGGGTGCATGTCAAATTCTCCAAAAGTACTGTATTTTTGAAGAATCCGACACGGGTGCGGCAATGTAAATGAAGACTCTGCACAACTTTGCTTAAAATAAGTTAGGAAGTGTTTGGTAATGTCAAAATGACTTAAAGCAAGTTTAAAATGACTTAAAATAAGTCAAAAACCAAAAGTAGGTCTCTCCCTACTTTTTATTTTTTGACTTAAAGTCCTTTCATTTTGACTTTTTATTTTTAACTTAAAAGCTACTTTTTTTAAGCCAAACCAA	21
	miR160b_1	miR160	TGCCTGGCTCCCTGTATGCC	GTTTAGCATTGGTGAAGGAGTAAGAATGATGTGCCTGGCTCCCTGTATGCCACACACTTTCACCAATTCTTTGATTGACTGATCAGTGGGTGGCGTGCGAGGAGCCAAGCATACCACCCGCTTTCTCATTTTCAATTTTTTTCTGAGATTGCTATATATACTTGTTGATTTGAAAAACAAAAGTCGCTCTAAATTTTCCTCATTTTTTAATTTGTGTGTGTGTTATGTGATTATGTTGCGTTGATTTCATCTGTCATTTCTACTTCTAATTTTAAACTAAGGTAATTGTCATTTAATGGT	51
	miR395g	miR395	TTGAAGTGTTTGGGGGAACTC	TAGTGTCGCCCCATATCTTAGTTCAAACCCCACTTTCACATTTGGCATGGAATTTTTTAAGCAAAACAATGTTATAAATAGGAATGTATGTTTTAACAACATCAAACAAACAAGTAGAAATGCAAGAGTATATATACTACTAACTAGTTGGAGATGATGAACAAAAATGTTTTTTAAGTCTATCAAGGTGTTTCCTAGAGTTCCCTTGACCGCTTCATTAGGGTTTACATTGTTGTTTGAAAAACCCTGTTGAAGTGTTTGGGGGAACTCCGGGGCTCACTTTGAAATTTACACAAACGA	270
	miR156g-3p	miR156	GCTCTCTATTCTTCTGTCATC	ATGGAAGCTGCATGCACCTTAATTCTTTGTGCTCTCTATTCTTCTGTCATCATCCTCAGCCCCTCCCAGATCCTCTCTAGTCTCTACCTTTAATTTATTACTACGTTTATTGTATTTAATTTTCCCCCCATATGTCTTCCTTTATCTTCAAAATCGAAAAATAAAGTTATATTATTTTGTTTAGCGTAACTTAATTCTGACCATGAAATTCAACCTGCTGCTTCCGAGCAAGAAAGGGTTTTAAATTAACTTAATTGTTACTTAATTAAGTCATATGTATTTGAGCTGATAGAGATAGAC	51
	miR8048-3p	miR8048	AGATGGACATGCTAATGAACA	AAAGAATGCAAAATAAAATGTCCAAATGACTAGTGTGAGAAATTAAAAGGAAAATAGTCTTAGAGGGCAAACAAAAAAAGAAAAATTATTTTTCTTCCTAATGAAGGAAAATAGTTTACTTCCAAATTTCCCTCCTTTTCGAATTTATCAGGAAGTGGCCTTTCTATATATATTCTATTGTATATCGGTATTTGTCGTCAACTCAATTTTCTCATTAGTGCGTAAATCTTGCTCATTAGCATCTCCATCTTGATCAAGATTTATTGATCTTGATGATCAAGATGGACATGCTAATGAACA	300
	miR164-3p	miR164	CATGTGCTCTAGCTCTCCAGC	TTCGTGAAGTATAATCCTATATATATATATATAAGTACTTTCATATAGATGTGTCATTTCTAGCATAATATGCTTCTCTAAAGCAAATAATATACGCGTTGATCCCTACTTAGTTGGAATCAGCTGCACTTGTTTCGTGCTATTCAGAAGTGTTCAGATGATTCGTCATAGTTAGGTGGACGATTAATTAAGCTGGAGAAGCAGGGCACATGCTGAATTACTTGAAACTTTGATTATTCAAGAATTTTGCATGTGCTCTAGCTCTCCAGCTTAATTCTCCCGCCAATTCCTTCATTCAAA	270
	miR164f_1	miR164	TGGAGAAGCAGGGCACATGCT	AGATCAACCACCATCTAATCAGAAAAGTACTATTACAAAGTATTATGGGATTCGTTTTCGTGAAGTATAATCCTATATATATATATATAAGTACTTTCATATAGATGTGTCATTTCTAGCATAATATGCTTCTCTAAAGCAAATAATATACGCGTTGATCCCTACTTAGTTGGAATCAGCTGCACTTGTTTCGTGCTATTCAGAAGTGTTCAGATGATTCGTCATAGTTAGGTGGACGATTAATTAAGCTGGAGAAGCAGGGCACATGCTGAATTACTTGAAACTTTGATTATTCAAGAA	270
	miR7993a	miR7993	ATATTTTATGTGGTTAACTTAACT	TTTAGAAACTCGAACTAAGTCATGTTCCAATTAATGAACACCTCAATGCCTAATAAAGTGTTCCAATATTAGACACTTTCTATTCATTTTGAAAAAACTTTTACGCGTGTTTTCATTCGTCTATTATGTAGTTAAGTTAACCATATAAAATATGTTCTCCTTTAATTATATGCATCAACCTCAAGTTGAAAACATCTTAAGTTTTTGCGGCTTATTAAGGTGAATGCATAGACTTAAAGGAGATGACATATATTTTATGTGGTTAACTTAACTACCTAAAAGACATATGGGAACACACAC	273
	miR397b_1	miR397	TTATTGAGTGCAGCGTTGATG	TTATGATTGGCGATCTTGAAAAAAAGTTGGTTATTGAGTGCAGCGTTGATGATACGTAAGAGATATGTTTTTCCGTGTTTCACCTTCAACTTGTACGTTTCTAATACAAATGAAAACGAAAATTCATGTTAGCAAGACAACAAAATTTCAAAGATTACCTGGCCTGTCGGCCAAGGCTATAAACTCGTTGAATAAATCTTACGATTAACAGAGCAAGGGTAAAGATCGCCCGGCCAGCCGTTAATAGTGTAAGCATTAGAGTTATTAGGTGCTGAGCCAGTTGCTAGCGCTGCATTCTCC	51
	miR172a_1	miR172	GGGAATCTTGATGATGCTGCA	GGATTCAGTTGAACTCCTTTAACTTTGATTATTAGCCAATCGATCGAGCTACTTCTCCTCTTCATTTTTTAACACTTTTTTTCATGTCATTTGGACACTCTCAAGAATAGGGTTTTCTTCATCAGTCAGTGTTTGAGGATGCAACATCATCAAGATTCACAAAACTTGAAGGGAGAATTATTTAATTATATATTTAGGTTGAATATTGGATATATATAATATAGTTCAAATCTCTTCTCTTCTCTCTTTGGGAATCTTGATGATGCTGCATCATCTAACATATGACTATCATTCTAAACA	270
	miR172e-3p	miR172	GGAATCTTGATGATGCTGCAT	GATTCAGTTGAACTCCTTTAACTTTGATTATTAGCCAATCGATCGAGCTACTTCTCCTCTTCATTTTTTAACACTTTTTTTCATGTCATTTGGACACTCTCAAGAATAGGGTTTTCTTCATCAGTCAGTGTTTGAGGATGCAACATCATCAAGATTCACAAAACTTGAAGGGAGAATTATTTAATTATATATTTAGGTTGAATATTGGATATATATAATATAGTTCAAATCTCTTCTCTTCTCTCTTTGGGAATCTTGATGATGCTGCATCATCTAACATATGACTATCATTCTAAACAA	270
	miR319c	miR319	TTGGACTGAAGGGAGCTCCTT	GTTAGTATATTTATTCCTCGGAATCTCATATATTCTTATCAAAAATGTATGATTTGATGATTTACTAAGGCTGTTCAGTTGAAGAAGTTAATTGTAAAAAGTTTTGTGAATTGAGGAATGGTCCAAGAGAGCTTCCTTCAGCCCACTCAAGGAGGAGAAATGGGGTTGAATTAGCTGCCGACTCATTCATCCAACCGCTCAGTAGAAAGGATAGGTTTTGTGCTACTGTGATTGAGTGAATGATGCGGGAGATAGTTTTCTATCCCTCTCTTTCCTTGCTTGGACTGAAGGGAGCTCCTT	300
	miR319c_1	miR319	TTGGACTGAAGGGAGCTCCT	GGTTAGTATATTTATTCCTCGGAATCTCATATATTCTTATCAAAAATGTATGATTTGATGATTTACTAAGGCTGTTCAGTTGAAGAAGTTAATTGTAAAAAGTTTTGTGAATTGAGGAATGGTCCAAGAGAGCTTCCTTCAGCCCACTCAAGGAGGAGAAATGGGGTTGAATTAGCTGCCGACTCATTCATCCAACCGCTCAGTAGAAAGGATAGGTTTTGTGCTACTGTGATTGAGTGAATGATGCGGGAGATAGTTTTCTATCCCTCTCTTTCCTTGCTTGGACTGAAGGGAGCTCCT	300
	miR319b_1	miR319	CTTGGACTGAAGGGAGCTCCT	GAGATAGTTTTCTATCCCTCTCTTTCCTTGCTTGGACTGAAGGGAGCTCCTTTTTCCCATTCTCTTCATTTTCAAAACCTAATTTTCAATAATAATTCTGTTTAACGTATTGTGGTGATTTCCAGGATAAGATCTTTCAGTTGTCTGGACAATTTTAAGCACTCAATCACTTCTGTTTGAATCAGTCAATAGTTTTCTCTAGCATCTTGTTTGTAGTACATGTATATGCTTTAGAAATCTACTTCGTCATATGATTCCAAGAGTTCTGTGTAGCCATTTCGATCACTAGGCAGTTGTCTG	51
	miR319c-5p_3	miR319	AGAGCTTCCTTCAGCCCACTC	AAAGTTTTGTGAATTGAGGAATGGTCCAAGAGAGCTTCCTTCAGCCCACTCAAGGAGGAGAAATGGGGTTGAATTAGCTGCCGACTCATTCATCCAACCGCTCAGTAGAAAGGATAGGTTTTGTGCTACTGTGATTGAGTGAATGATGCGGGAGATAGTTTTCTATCCCTCTCTTTCCTTGCTTGGACTGAAGGGAGCTCCTTTTTCCCATTCTCTTCATTTTCAAAACCTAATTTTCAATAATAATTCTGTTTAACGTATTGTGGTGATTTCCAGGATAAGATCTTTCAGTTGTCTGGA	51
	miR8011b-3p	miR8011	TTCGTGAGACAAAAAGAAGCCT	GAGAATGTGGTGAAGCTTATATCAATTGGCAAGAACTATGAAGTTGGTGTTCAGTTTTTTGGCAAAGCAGAAGTTTTCACCTCAAGAATCAGAAGCAAGTTTCTGGATCCTGAAGATTAGCTTCCAATGTCATCCTCAAGATTCAAAAAAGTTCTATTTTGTGACTCACACAACTGACACTAGTCGAGTGAGACTCATTTTTGTCTCACAAAAAAATAAACCCAAAAGTGTAAGATTTGAGTCTACTTTTTCGTGAGACAAAAAGAAGCCTCACACAACTAGTATCAGTGTTGTCATAAA	271
	miR398a-3p_1	miR398	TGTGTTCTCAGGTCACCCCTT	AGGTTATTAATTACTGGTCAAGTTTTTCCACAGATATGACAACATTATATTCTTCTTGTGTTGATAGAATGACCACATCTTGTTTTGTTTTCTTTCATGGAATGACAACATTGTGATGCTCCAATTTGTTCACAAAAAAACACTATAAAAATAGGGCCAACATATGTTGATGTATTCACATTATTGTGAATGATGGTGAACAATGGTGCACCCCAAAGGAGTGTGCCTTAGAACACAGGTGTATTTTGGTCTACTCCTGTTTTGGACCCAAAATATGCTTGTGTTCTCAGGTCACCCCTT	300
	miR398b-3p_1	miR398	TTGTGTTCTCAGGTCACCCCT	TAGGTTATTAATTACTGGTCAAGTTTTTCCACAGATATGACAACATTATATTCTTCTTGTGTTGATAGAATGACCACATCTTGTTTTGTTTTCTTTCATGGAATGACAACATTGTGATGCTCCAATTTGTTCACAAAAAAACACTATAAAAATAGGGCCAACATATGTTGATGTATTCACATTATTGTGAATGATGGTGAACAATGGTGCACCCCAAAGGAGTGTGCCTTAGAACACAGGTGTATTTTGGTCTACTCCTGTTTTGGACCCAAAATATGCTTGTGTTCTCAGGTCACCCCT	300
	miR398	miR398	TGTGTTCTCAGGTCACCCCT	TAGGTTATTAATTACTGGTCAAGTTTTTCCACAGATATGACAACATTATATTCTTCTTGTGTTGATAGAATGACCACATCTTGTTTTGTTTTCTTTCATGGAATGACAACATTGTGATGCTCCAATTTGTTCACAAAAAAACACTATAAAAATAGGGCCAACATATGTTGATGTATTCACATTATTGTGAATGATGGTGAACAATGGTGCACCCCAAAGGAGTGTGCCTTAGAACACAGGTGTATTTTGGTCTACTCCTGTTTTGGACCCAAAATATGCTTGTGTTCTCAGGTCACCCCT	300
	miR396-3p	miR396	GTCCAAGAAAGCTGTGGGAAA	TATGTCTTTAACTCTTCTCTCTTCTCACAAATCAACTATTTTTCTCAAATTCTTATCTTTTTTTAAAAAAACTTGTTCAATTTTTCCTTATATTAAAACTTTAAGAATTGACAAGTTTTACGCTGGTTGTTGATCGATGACGATGACTAAGTCCTAGTCATGCTTTTCCACAGCTTTCTTGAACTTCTTCTTGCTAAATTTTGATCTCTAAATTGATAATTTTGAGATGAAATTTTTGAAGCTATGAAAGTCCAAGAAAGCTGTGGGAAAAGATGGCAAGCTTTGGACTTATTTTTTACA	270
	miR396h	miR396	TCCACAGCTTTCTTGAACTG	CCTTTGCAAAAAATGGTCCTTTTTGTTTTTTTCCACAGCTTTCTTGAACTGCATCTAATTACAATTTCAATTCACAAAATGAATAATTGATTCATATTGTTGTTGCGGTTCAATAAGGCTGTGGGAAGATACAGATAGGGTCAAACAGAATTGAATCGCTACGGAGTTAATCTGTTGTTTTGAGTCGAGGATCTATCAGAAATAAATTCTTAGAGTAAATATGTATCCTATTCTTTCAGATCTCACTATGAGATTACATGGGGTATGTTCTTATTGTTTTATATAGTTTCACAATATGGT	51
	miR396a-5p	miR396	TTCCACAGCTTTCTTGAACTG	CCTTTGCAAAAAATGGTCCTTTTTGTTTTTTTCCACAGCTTTCTTGAACTGCATCTAATTACAATTTCAATTCACAAAATGAATAATTGATTCATATTGTTGTTGCGGTTCAATAAGGCTGTGGGAAGATACAGATAGGGTCAAACAGAATTGAATCGCTACGGAGTTAATCTGTTGTTTTGAGTCGAGGATCTATCAGAAATAAATTCTTAGAGTAAATATGTATCCTATTCTTTCAGATCTCACTATGAGATTACATGGGGTATGTTCTTATTGTTTTATATAGTTTCACAATATGGT	51
	miR7996a	miR7996	ATGTGGTACATATGAAATTTGAAA	TATATGTTACTGTTTCTGTTTTAATTTATGTGGTACATATGAAATTTGAAATTAATCAATTTTTTAGTATGTTTTTATATATTTTAAGTTGCTAATTATTTGTATTTAGAGTATATTTTACGTAAATATATTAGAAATCACAATAATTAACAAGTTAATATAAAAAAAAACTTATAAAAAATTCATTGACTTTTGAAATTTCATTTGTATCACATAAATCAGGACCGAGTAATATATATGAAAATTACATAAAACGTACTATAACTCACAATAATTAGCAACTTAAAATATCTATATATC	51
	miR169a-5p	miR169	CAGCCAAGGATGACTTGCCGA	CAGCCAAGGATGACTTGCCGACTTTTGTATTACTCTTCATATGGAAACTTGGAAGATAAAGTTGGCAAGTGGTCCTTGGCTACATCTTTCTTTCTGCCCCTCAAGCCAGGTCTTTCCTGTACATCATAACATGATTATTTCTTCTACAAAACCATGGTAATGCCTTTCCACTTTTATCTATATACACTTTTAATTAGTACATGAATCTATCTACAAATTAAACATGCATGCTGCCCCTCATCTTATACATCTTTACCCCATATATGTTTTGTTTAACTACCATTTTTTCCCTTCAAAAGA	21
	miR408a-3p	miR408	TGCACAGCCTCTTCCCTGGTT	TTCTTCTGGTCCTTACTCCATCATAAAACAGCCATTGCACTAATTACCTTTTGGTCATTGAAAATTTTCATCAGGAAAAGGCCTTTTCATGTATACTCCAGATGGAAGGAATGTTTAGCATTATTGGCGAAATTAAGGAGTCCCTATATATTGAGGTAATTATGGTGTAGAATGATATTCAAAAGTGGAGAGGATAGACAGGGACGAGGCAGCGCATGAGATGTACAATTTTACTAGTTGCCCATTCCATGCACAGCCTCTTCCCTGGTTCTCCTCCCCCAAATCTCTCTCTTTTTTTTC	270
	miR408-3p_2	miR408	ATGCACTGCCTCTTCCCTGGC	AGTACTAGCCTTTGTACTATATACCTATTTCTTCTTCTAGTCTTAAATCCACATAAATCAGCCATTCCACTAATCATTTGGCCATCGACAATTAAAAAAAAAACGATTCGTCTTTATTTTTTTTCTCTAGATGGAAGGAATGTTAAAAGCATGGGTAAATGAAGTCTCTGTTGAGGTAAAATATGGTGTGGTATGGATAGACGGGGACGAGACAGAGCATGAGATGTGCAATTTTTACTTGCCTATTCCATGCACTGCCTCTTCCCTGGCTCTCCTCTCCCCACAATCCCTCCTTTTCTT	270
	miR408a-5p_1	miR408	ACAGGGACGAGGCAGCGCATG	TATGTATGTACTCCTCAATTAGTAGTACTATCACTTGTACTATGACTATTTCTTCTTCTGGTCCTTACTCCATCATAAAACAGCCATTGCACTAATTACCTTTTGGTCATTGAAAATTTTCATCAGGAAAAGGCCTTTTCATGTATACTCCAGATGGAAGGAATGTTTAGCATTATTGGCGAAATTAAGGAGTCCCTATATATTGAGGTAATTATGGTGTAGAATGATATTCAAAAGTGGAGAGGATAGACAGGGACGAGGCAGCGCATGAGATGTACAATTTTACTAGTTGCCCATTCC	270
	miR408b-5p_2	miR408	ACGGGGACGAGACAGAGCATG	ATTGAATCTTCAAAACAGAGAGGGTCAGCTGTACTCCTTAGTACTTAGTAGTACTAGCCTTTGTACTATATACCTATTTCTTCTTCTAGTCTTAAATCCACATAAATCAGCCATTCCACTAATCATTTGGCCATCGACAATTAAAAAAAAAACGATTCGTCTTTATTTTTTTTCTCTAGATGGAAGGAATGTTAAAAGCATGGGTAAATGAAGTCTCTGTTGAGGTAAAATATGGTGTGGTATGGATAGACGGGGACGAGACAGAGCATGAGATGTGCAATTTTTACTTGCCTATTCCAT	270
	miR408b_1	miR408	TGCACTGCCTCTTCCCTGGCT	GTACTAGCCTTTGTACTATATACCTATTTCTTCTTCTAGTCTTAAATCCACATAAATCAGCCATTCCACTAATCATTTGGCCATCGACAATTAAAAAAAAAACGATTCGTCTTTATTTTTTTTCTCTAGATGGAAGGAATGTTAAAAGCATGGGTAAATGAAGTCTCTGTTGAGGTAAAATATGGTGTGGTATGGATAGACGGGGACGAGACAGAGCATGAGATGTGCAATTTTTACTTGCCTATTCCATGCACTGCCTCTTCCCTGGCTCTCCTCTCCCCACAATCCCTCCTTTTCTTC	270
	miR408d	miR408	TGCACTGCCTCTTCCCTGGC	GTACTAGCCTTTGTACTATATACCTATTTCTTCTTCTAGTCTTAAATCCACATAAATCAGCCATTCCACTAATCATTTGGCCATCGACAATTAAAAAAAAAACGATTCGTCTTTATTTTTTTTCTCTAGATGGAAGGAATGTTAAAAGCATGGGTAAATGAAGTCTCTGTTGAGGTAAAATATGGTGTGGTATGGATAGACGGGGACGAGACAGAGCATGAGATGTGCAATTTTTACTTGCCTATTCCATGCACTGCCTCTTCCCTGGCTCTCCTCTCCCCACAATCCCTCCTTTTCTTC	269
	miR5303f	miR5303	ATTTTTGGAGAATCTGACACGGGT	GCTCTATGTACAAGTCCTAGATTCACAATCAACTAGATGATGAACTCTCTTGATGTTAAGCTGATTCCAAAATTTACTTTTGAGCATTAAAAAAGGAAACCAAAAGAAATTACGTGACTTGAACTTGGATATTTTGAAAAGATTCCATAGATTACTGTCAATCTATGTTGCTCGGACTCTGAACTTGGATATGTTAAGCTGATTCCAAAAATGTCAACGGGTGCGTGTCAGATTCTCCAAAAGTAGTGTATTTTTGGAGAATCTGACACGGGTGCGATATCATAAGTGAAGAGTCCGCGC	273
	miR7990b	miR7990	GAATTTTCAAATGATCGTAACTTT	AAGCTCGAGTTATGGCCGTTTGAATTTCCTTTTTATTTTCTCATCTTATTTCTACTCGCCTAAGAATGAGTAAAAGGAATTTTTTGAAAAATCGGCTCGTTCAAACACCCTTACGGAAGTTTGGTGGCGTAAATATCGAAAAAATACGCAGGTTCAAAAATAAAATCGCCTGAAACGAACATCCGAAGACCGAGTTATGGCCGTTTGAAGTTTCCCAAATTCACAGCTACCTTCAATCCTTAAGGTGTTGAATTTTCAAATGATCGTAACTTTTGACTCGAATGTCCTTTTGAAACAATT	273
	miR5304-5p	miR5304	CAATGCAACATACTCATCACC	CAATGCAACATACTCATCACCACATCTTTCATCTCATGTGCAAAAGATGAAAGTTACGGAGATGAGTATGGTGCATTGGATGTGTGGCCATGCCATGAATGATATTAGAAATGAAAGATCTGGGATAAGTTTGGAGAGACCTTAGTGAAAGACAAGATGCGTGAAGCAAGGCTGAGATGATGTCAATATGTGAAGAGGAGATGTAAAAATGCTCCAGTGCGGAGGTGTGAGAGGTTGGCTATAGATGGTTTCAGGAGAGGTAAAGGCAGGTCGAAAAAAGTATTTGGGGGAGGTGATTAG	21
	miR5304-3p	miR5304	AGATGAGTATGGTGCATTGGA	ATACTTATTTGCACCCCATTGGCTTGCAAAAACTGAATGGTAACAGCTAGTTCTTCCTCTTCAAGTATGGTAGATCCTGTTTTATCTATTTATCTAGTCCGTCACCTTATCTCAAAAGAGAAGTTTTACTAGAAATGATATTTATCTTTATGAGTTGTCTAATTTAGATCCAGGGTGTAATTTGCTTATTCAATGCAACATACTCATCACCACATCTTTCATCTCATGTGCAAAAGATGAAAGTTACGGAGATGAGTATGGTGCATTGGATGTGTGGCCATGCCATGAATGATATTAGAA	270
	miR7983-3p	miR7983	ACTAATGCCGGTAAAGACTTTAAC	ATGGTAGCTTGGTGTACGAAGCATTCCAGTGAAGGCGCACCACACTCTAATTAAGGGAGTGTGAAACCCGTTCTTATATGCCACATGTAAAACAAATTAAAATGTTACTCGAAAGCTCCTTTCACTACATCAAAAATGATCATTAGCGGCAATTAAGAATTAATTGCCGCTAAATATGTATTTTTAGAGGCAATTAGCACTTTTGTATGTCTCTAAAGCCTTCAACGACATTGGTTCTAATGACACTTAACTAATGCCGGTAAAGACTTTAACATTCTTTATTAATGTCAATATTTAATG	273
	miR390d-3p	miR390	CGCTATCCATCCTGAGTTTTA	AGAATAATTTTTGTTAGTCAATATACATCCCCACGTTAGTTTGCTACTATAAATAGGTTCTTTTTTTCTTCAAAACTTTCCCAACCATTCATTTCATCATTTTTGGTGCTGTCCTTTCTTTATGTTTTTTCCCTTTCATAAACTATAGTGAAAAAAATTAATTTTCTGGTGGAAATGCATGGAGAATCTGTAAAGCTCAGGAGGGATAGCGCCATGGATGATTCAATTGATCTGTTTGCACATCTCTAGCGCTATCCATCCTGAGTTTTACGGCTTTTTCACGCTCATTTTTTAATGCAT	270
	miR390a-5p	miR390	AAGCTCAGGAGGGATAGCGCC	AAATAAAAAAAATGAATAGTATTGACCAATAATAGAGACAAATACCACACAAGTTGAAGAATAATTTTTGTTAGTCAATATACATCCCCACGTTAGTTTGCTACTATAAATAGGTTCTTTTTTTCTTCAAAACTTTCCCAACCATTCATTTCATCATTTTTGGTGCTGTCCTTTCTTTATGTTTTTTCCCTTTCATAAACTATAGTGAAAAAAATTAATTTTCTGGTGGAAATGCATGGAGAATCTGTAAAGCTCAGGAGGGATAGCGCCATGGATGATTCAATTGATCTGTTTGCACAT	270
	miR8049-3p	miR8049	CATGTCTACATGAGCCTGATA	GCAATGTGGGTTTGAGAAGATTGGCTAATAAAGAATCTGCTGGAGCTGATATTTTTTCGTCCCTAAGTGAAGAGAAAAAATCAAGGTGGATACTTTGTGAATCTTGTTCCTGTGTGGGCAGATTTTGTTGTTTTTAAAAGTGGATTACTGAATTATGCCTTATTGAGACCCTTTTTCATATTTAACTGCTACAAGGCTCATGCAGACATGCACTAGAGATATGTATGTGTGTGTGTAATATCTCTAGTGCATGTCTACATGAGCCTGATAGCAGTTAAATATGATAAAGGGTCTCAATAA	270
	miR8049-5p	miR8049	CAAGGCTCATGCAGACATGCA	CTGAAGCACCTATTGTTTTTCTCGGATGATTTAAATATGGTTTCACCTAGCTTGTCTGGCAATGTGGGTTTGAGAAGATTGGCTAATAAAGAATCTGCTGGAGCTGATATTTTTTCGTCCCTAAGTGAAGAGAAAAAATCAAGGTGGATACTTTGTGAATCTTGTTCCTGTGTGGGCAGATTTTGTTGTTTTTAAAAGTGGATTACTGAATTATGCCTTATTGAGACCCTTTTTCATATTTAACTGCTACAAGGCTCATGCAGACATGCACTAGAGATATGTATGTGTGTGTGTAATATC	270
	miR8020	miR8020	AATTTCATTGAGTATGTTGTTGTT	TCTACTCTCCTCAGACCCACTTAGTGGAATTTCATTGAGTATGTTGTTGTTGTAAAGGATATTGAATGAATGCAAGTACAAAAGTTACAACAACAACATACTTACTGAAATTCCACAAAAGGGGTCTAGGAAGGGTAGAGGTTGTTTCCAAAAGACTCTCGGCTCAAGTGTAGCAAATTCAAGTACAAAGAAGAATAAAAAAATATAAAAAACATAACAACTATCAAGCAAAGCGGTGGAAAGCCTACAAGAACAACAAAATAATGTGATAATTGAAACACAGTAAACAACAGGCGACGA	51
	miR8021	miR8021	ATTCAAGGCTCAAACTCGAGACCT	GAGGGACAACTAACAATATTTTTTCATATTCAAGGCTCAAACTCGAGACCTCTGGTTAAGGATGGATGTTTCATATACATCCTTCCATAACTATTGTTGGTCCTAATAATAACTTAATTCACTCTCTCTTGCATATTCTGCAATATGTTGGATTAAGTTATTGAGTTCTACCAACAATAATGTGTTGGAGAAGAAGTTAATATTACCTCATCCTTAACTAGAAGTGTCAAGTTTGAGTCTTAGGCATGAGTTATCTTTGTTAGAAAGAGTTTTACCCTCAATTTGAAACTTTCCATTATC	51
	miR169h_2	miR169	TAGCCAAGGATGACTTGCCTG	TAGCCAAGGATGACTTGCCTGCACCACTTAGAAAGGTCTTTACATGCACCATATATAATATCGATGGTCATGTGTCCTTTCTTTCTTGGTTTTAAATTACAAGGACTTTCATTTGGTATACAACTCATAGTATAATTCATTGTATATATGGAGATATATATAATCCATTGAAGTTAGGTCGTGTGTGACTATATAGTCATTTTTTCCCCTTCAACTTAGCCTAAGCAAAAAATTAATAGTTAGCGGACGGAGCTTTACAACATGTGTGCTAACAACATACTTAAAATTTAAACCTATTGA	21
	miR169f.1	miR169	TAGCCAAGGATGACTTGCCTA	TAATCCAAAATCATAAAGAATATATTCCAAAATATGACTTGAGATCAATAGGAAGAATGTCAAATAGGGAGAACAAATTAAAAAAGCAAAAAATAAAATAAAATGAAGGCCAATTTTTTCTCACTTTTTTCCCCTTCTTGAAGCTATAAATAGAGACATTTAGAGACCAAATAAATGCATCACATATTTGTAGAAGTTAAATAACATTATTGAAGAGGGGTTTTACATGAAGTTGAGAGTATTGTTTAGTAGCCAAGGATGACTTGCCTACTCCATTTGATAATATTTTTTATTTGGTTG	270
	miR169e-3p_2	miR169	GCAAGTTATCCTGGCTATC	GAATGTCAAATAGGGAGAACAAATTAAAAAAGCAAAAAATAAAATAAAATGAAGGCCAATTTTTTCTCACTTTTTTCCCCTTCTTGAAGCTATAAATAGAGACATTTAGAGACCAAATAAATGCATCACATATTTGTAGAAGTTAAATAACATTATTGAAGAGGGGTTTTACATGAAGTTGAGAGTATTGTTTAGTAGCCAAGGATGACTTGCCTACTCCATTTGATAATATTTTTTATTTGGTTGTAGGCAAGTTATCCTGGCTATCTTGACATGCTCTTAATTTTTCATGTAAGACCT	268
	miR169d-5p_1	miR169	TAGCCAAGGATGACTTGCCT	ACATGAAGAGGAGAGTCATATTATTGTTTAGTAGCCAAGGATGACTTGCCTGCTTCAATATTACTTAAAAGATTTTTAATTACACCATTATTAATACAATGGTCACCTTTTATTGGTTGGTTTCAGGCAGTCTCCTTGGCTACCTTGACATGCTCTCTTCTTTCATGCAAGATTTTCTCTTCCGTCGCTTCTTCTGTTTCAATTTATTTGATAATTTTTTGTTTTTTTAGTTTGTTTCTAAGAGAATGACATACTATTGAATTCGAAAATAGTTAAGTTTACACTTATCATTTTACTCTA	51
	miR169d-3p_1	miR169	GCAGGTCATCTTTAGCTAACT	ATGTTTGAGGCCACAAGTTTCAAAGGTTAACACTCTAAAGTCATAAAAATGTTATAGTAGGTTTAAGACCATTATAAGTATCAAAAGTTTTTATAAATTATTTCTTAAATTCTATACCAAGTCGTCGAACTATAATGGAGGAAGTAATTTACAAAGGAGTCAAATTAATGAGAAGAGGAGTCTAGCATGATGAAAAGAGTCTTATTTGGTAGCCAAGGATGACTTGCCTGCACCACTTCTGAAAAGATCTTTCATATGTTCTTTCGTTCTTGGGGTCAAGCAGGTCATCTTTAGCTAACT	300
	miR172c-5p	miR172	GTAGCATCATCAAGATTCACA	AGTAATGTGAAAGAATCGGTGTTTGCAGGTGTAGCATCATCAAGATTCACATGCAAATTAAATGCAAGGTTGTGGCAGATCTATTTTTAAAGGGCCTTTTCAAAGTGAGAATCTTGATGATGCTGCATCATCAATAAACGACTAACAAAGTTTATTTCTAAATTAGAATTAGGGTATATAATATATACTTGCCACACTTTGCAAAAAAGATCAACCTCGATCAGTCATATATATGGTTTGCTCCATAGAACATCTGCTATTGTAAAGTTTCAAGGTATGTTTATATATATATATATCATA	51
	miR172a_3	miR172	AGAATCTTGATGATGCTGCAT	GATCTATTTTTAAAGGGCCTTTTCAAAGTGAGAATCTTGATGATGCTGCATCATCAATAAACGACTAACAAAGTTTATTTCTAAATTAGAATTAGGGTATATAATATATACTTGCCACACTTTGCAAAAAAGATCAACCTCGATCAGTCATATATATGGTTTGCTCCATAGAACATCTGCTATTGTAAAGTTTCAAGGTATGTTTATATATATATATATCATATTTTGTATTTTAATTTCATTCACACTCTATATAGAGCTTATTAAGGAAAAATTGAGCTCCATATCTGAGCCATTATA	51
	miR172b-5p_2	miR172	GTAGCATCATCAAGATTCAC	AAGTAATGTGAAAGAATCGGTGTTTGCAGGTGTAGCATCATCAAGATTCACATGCAAATTAAATGCAAGGTTGTGGCAGATCTATTTTTAAAGGGCCTTTTCAAAGTGAGAATCTTGATGATGCTGCATCATCAATAAACGACTAACAAAGTTTATTTCTAAATTAGAATTAGGGTATATAATATATACTTGCCACACTTTGCAAAAAAGATCAACCTCGATCAGTCATATATATGGTTTGCTCCATAGAACATCTGCTATTGTAAAGTTTCAAGGTATGTTTATATATATATATATCAT	51
	miR172a_2	miR172	AGAATCTTGATGATGCTGCA	AGATCTATTTTTAAAGGGCCTTTTCAAAGTGAGAATCTTGATGATGCTGCATCATCAATAAACGACTAACAAAGTTTATTTCTAAATTAGAATTAGGGTATATAATATATACTTGCCACACTTTGCAAAAAAGATCAACCTCGATCAGTCATATATATGGTTTGCTCCATAGAACATCTGCTATTGTAAAGTTTCAAGGTATGTTTATATATATATATATCATATTTTGTATTTTAATTTCATTCACACTCTATATAGAGCTTATTAAGGAAAAATTGAGCTCCATATCTGAGCCATTAT	51
	miR397a_3	miR397	TCATTGAGTGCAGCGTTGATG	TCATTGAGTGCAGCGTTGATGACATATTTGAGAATTTCTGTATTTTGGCCTTTCTCATTTTTCATCAACGCTACACTCAATCATGTTTTTAATTCTCTGAAGGAACAATTTACCAAGGAGTTATATGATTACTGCAGATCCAACAGGTTTGATGTCCCCTCTCTACCTCTTCTCAAATTTCTCTAAAACAAGATGTGTAGCAATGCAATGCGCGCGGAGACTTGATAACTTCACTCGTCTTTGATAATATTTTACCTTGTTTCATTAATAGATTGACTAATTCAATTCATGTTTTCATAA	21
	miR397-3p_2	miR397	CATCAACGCTACACTCAATCA	ACTATTAAATTAGATTAACAGGGTGGACTAAGATAAAAGGAAGTGGAAAGTGTGCTGCAAAATAATGTGAAGCAGGAGATTTTCCAGAAATATGGTAGAGTGCATAGTCCATAGTATCGCTGGAGCCCGCACATAGAGGGAGTTTTAGAGCACCGAACTGCCCTTTATTACAGAGTGCTTAGAAACATCATTGAGTGCAGCGTTGATGACATATTTGAGAATTTCTGTATTTTGGCCTTTCTCATTTTTCATCAACGCTACACTCAATCATGTTTTTAATTCTCTGAAGGAACAATTTAC	270
	miR397-5p	miR397	ATTGAGTGCAGCGTTGATGAC	ATTGAGTGCAGCGTTGATGACATATTTGAGAATTTCTGTATTTTGGCCTTTCTCATTTTTCATCAACGCTACACTCAATCATGTTTTTAATTCTCTGAAGGAACAATTTACCAAGGAGTTATATGATTACTGCAGATCCAACAGGTTTGATGTCCCCTCTCTACCTCTTCTCAAATTTCTCTAAAACAAGATGTGTAGCAATGCAATGCGCGCGGAGACTTGATAACTTCACTCGTCTTTGATAATATTTTACCTTGTTTCATTAATAGATTGACTAATTCAATTCATGTTTTCATAATT	21
	miR397-5p_1	miR397	ATTGAGTGCAGCGTTGATGA	ATTGAGTGCAGCGTTGATGACATATTTGAGAATTTCTGTATTTTGGCCTTTCTCATTTTTCATCAACGCTACACTCAATCATGTTTTTAATTCTCTGAAGGAACAATTTACCAAGGAGTTATATGATTACTGCAGATCCAACAGGTTTGATGTCCCCTCTCTACCTCTTCTCAAATTTCTCTAAAACAAGATGTGTAGCAATGCAATGCGCGCGGAGACTTGATAACTTCACTCGTCTTTGATAATATTTTACCTTGTTTCATTAATAGATTGACTAATTCAATTCATGTTTTCATAATT	20
	miR164a-3p_1	miR164	CATGTGCCTGTTTTCCCCATC	ACCTTAGCTTGAGCAAATATTATACATCATATTTCAATTCGAAAGAAAATTAAACTTTCTCTTCCCTTCTTCTTTCAAAGCAATTTGCTAGGTGAGTGTTGATCGAGATGGAGAAGCAGGGCACGTGCATTACTAACTCATACGCAAGATTTGTCGGTGTTTCGAAAATTCTGCTATCATAGTACTGTATTTTACAGCATATACTGGTTGTACTTTACATGTATGTGGTAAAATGATGAGTTAGTTATTCATGTGCCTGTTTTCCCCATCATGACCACTCAACCTTATTATCAGTACCAT	270
	miR8023	miR8023	TTTGGCACAATTTCATTGGCAACC	GACACAGAGAGAGAGAGAGTATATATATACACATCGATATAGATAGATACATAGATAGATATAGAAAAATATATTTTTTCCTTATTTAGAAACAACAATTAAACTACAACTGTCTTCTTCAAAAATTCATGCAGTTTTTGGTTGCCAATGAAATAATGCCAAAAAAAAAAAAAACTCATTACATTAGATAGTCAAAGGTAATGATTTTGTCTCTTTTTGGACTGCCAAATGTACTGATTTTCTGTCTTTTTTGGCACAATTTCATTGGCAACCAAAACCCTATGAATTTCTAGGAAGACA	273
	miR10528	miR10528	AATGCAATGTCATATACCATC	AATGCAATGTCATATACCATCAACACTCGGAAACTCAAATCGAGGTTAAATCTCCGAGTGATGATGGTATATGACCTTGCAATTCACTATGAGATAAGTTCAATGCGTGAATTGCCATGAGATCTCCCATAATCCTTGGAATATGCCCCTCAAATTTGTTCCTTAAACCATCAATACTAGTTTAAACAGTCAAAAATTCTAACAAGTCCAAGCTCCAGTCTCCTGCTTACAAGTGTTATCGAATTTTTGGTAATATCCTTCCTCCAAGATAAAGATGTTCTAGTGACTTCATTGTTTGAC	21
	miR319a-3p	miR319	TTGGACTGAAGGGAGCTCCC	TCTTTCTCCATTCCCCTAATGTTACTTCCCCATATTTGCCTTAGTATAATAAATTTCTTCAATTTTTTTTAATTTTTTGTATAATATATGTAGAGAGCTTTCTTTAGTCCACATAAAGGGGGCAGTATGGTTCAATTAGCTGCTGACTCATTCACACAAATGCTAAGGTTTTGATAGTTAGAAGAAGGAAAGGCCTTAGTAATTGAGTGAATGATGCGGTAGACTGATTGAATCTTAAGCTTCTTTTGCTTGGACTGAAGGGAGCTCCCTCTTCATAGTTACTTGCTAATATATTTTCTC	269
	miR8001b-5p	miR8001	ATGGGGATTAGTATGAAAATTTGC	TGTCACTATAAGAAAAGTGTGAATTACATGGGGATTAGTATGAAAATTTGCAGGAAAATAAGTTTCCTACGGATTTTCATACTAATCCCCAGGAAAATTCCCATGTAGTTCACACTTTTCTTGTAGTGCGTGATGTTGTTATTATCTGCTGGTGATTTTGAGATAACAATTTTGTTTGTTGAGTTAAAAGTGGTCTGGTCGTAATGACGATCTTAACGCCTTATCGATTGGTTGTGGCTCATTTTTGCATCCTTGTTGATTCTCGCGTTATTGCACTACTTTTGGTTAGTCAAGCTTCAT	51
	miR8032a-3p	miR8032	AGTGTGAGTCGGTGTGATTAGG	GCATGGTCAGGATGACTCCCGAGGTTTTCAGTGTGAGTCGGTGTGATTAGGCGTTTTAACATTAAGTTTAAGCCTAAGTTTGACGTTGGTCAACATTCTGAGTATACGCGCTCGAATGAGAATTTCGCCAGCTCGGTTAGCTCTGGAATGTCAAGTTTGGTCTAGATTGACCTTTCTTTTGTGTCTCGAGGTTTTTGATATTTTTCGGAGCTCTTTTGTAGTTTTTGACTTAAAATGACATTTGGGTGTGAGACCCACTTTTTGTCAAGATGGCATTGTATGGAAATTTTGACTGTGCCA	51
	miR168b_1	miR168	TCGCTTGGTGCAGGTCGGG	GGGAGTAATATTTAACTCTAAAAAAAGAAATCATGAAAATGAAAAGTGGACAGGAGATAGTATGTCACAATTTTAAACCCTTTTTCTCCCTCTCGATTTTTTCCAAATTTTGCCCAAAAAATCTATCTTCCCTCCACGTGTCTTCATATTATTCGTTCGTTTTATCTATAAATAAGATCTTTTCTTCCTTTAGCCATAACTCTGGTCTCTGCCCTTTGCTCAGTTAACTTTTTTGCGGCCGCCTCTTATTCGCTTGGTGCAGGTCGGGACCTCATTCGCCGGCGCCGGAAATAATGACGG	268
	miR168	miR168	TCGCTTGGTGCAGGTCGGGA	GGGAGTAATATTTAACTCTAAAAAAAGAAATCATGAAAATGAAAAGTGGACAGGAGATAGTATGTCACAATTTTAAACCCTTTTTCTCCCTCTCGATTTTTTCCAAATTTTGCCCAAAAAATCTATCTTCCCTCCACGTGTCTTCATATTATTCGTTCGTTTTATCTATAAATAAGATCTTTTCTTCCTTTAGCCATAACTCTGGTCTCTGCCCTTTGCTCAGTTAACTTTTTTGCGGCCGCCTCTTATTCGCTTGGTGCAGGTCGGGACCTCATTCGCCGGCGCCGGAAATAATGACGG	269
	miR168a	miR168	TCGCTTGGTGCAGGTCGGGAC	GGGAGTAATATTTAACTCTAAAAAAAGAAATCATGAAAATGAAAAGTGGACAGGAGATAGTATGTCACAATTTTAAACCCTTTTTCTCCCTCTCGATTTTTTCCAAATTTTGCCCAAAAAATCTATCTTCCCTCCACGTGTCTTCATATTATTCGTTCGTTTTATCTATAAATAAGATCTTTTCTTCCTTTAGCCATAACTCTGGTCTCTGCCCTTTGCTCAGTTAACTTTTTTGCGGCCGCCTCTTATTCGCTTGGTGCAGGTCGGGACCTCATTCGCCGGCGCCGGAAATAATGACGG	270
	miR168a-3p_1	miR168	CCTGCCTTGCATCAACTGAAT	ATCTATCTTCCCTCCACGTGTCTTCATATTATTCGTTCGTTTTATCTATAAATAAGATCTTTTCTTCCTTTAGCCATAACTCTGGTCTCTGCCCTTTGCTCAGTTAACTTTTTTGCGGCCGCCTCTTATTCGCTTGGTGCAGGTCGGGACCTCATTCGCCGGCGCCGGAAATAATGACGGACGACGGCGGTGTTAATTCTACTAAGTTGTCAACGACGAATATATTTTGATTAGCGGCGAAATTTGGGTCCTGCCTTGCATCAACTGAATTGGAGACAGCTGTGAATTGAAGATTTCGGA	270
	miR172e-5p	miR172	GCAACATCATCAAGATTCACA	TTGACACATGTACAGTTGTTATTTGCAGCTGCAACATCATCAAGATTCACATAAAATAGAAATAATGTGGAGTAGAAAAAAAAATAAAGTTGCTTCTAAATTATGTCTCCATATTATTATTTTTTTGAAAATGAGAATCTTGATGATGCTGCATCGGCAAATTATGACTTTTTTATCCTCTAAGAAAATAGTGAATTAAAGGAATTCAGGATGATCTTGACTTTACTATTTATTTTGGTAAGTATTCAAAATTGGACTTTGATTTTATGCACTTATAGTTTTAGTTTATGCTTTGATTAA	51
	miR7981c	miR7981	TCGAAATCTCAGAGACACACTTAT	TTCGATTCCTTTATAGTGTTGACTTTTTTGAACTGCGAGTTCTTTGGCACTTTTAAAATTTTGATGATCTATTTGTTTAACAAGTGTATTTCAACCTTCACTTTTCTCTCTCCATCTTTCTGCCCTTTTTCCCTCTTTCACTTTGCTTTTTCCGATCTCATTTTTTCCTCTCACTTTCTCATCATCTTCTTCAATGAGCGGTGAAATCTGCTGGACTTCGTAAGTCTTTTTTTGGTTTTAGATCCTATTTCGAAATCTCAGAGACACACTTATACTATACTAAGGTCCTATTACCCCGAA	273
	miR8025-3p	miR8025	TTTAATTGCATGCCAAGTGTGTGG	GAAAATAAATAATGAATATCAAATAGTAATAATATATAAACTAATATGTTCATGTGTGATTTTACTATTTCCTTGTATTGCTAGCATATAACCTTTTCTTTTATGAACTGGTACAACATGAGAAGATATTTTGCTACATACTCGACATGCAATTAAATTATATAAATCATCACTATGTTTCTCTTAATTAAGCTGAATTAATATATGATTCAACTTGCTTAAGAGAAAAATAATGTATACTTATACTAATTTAATTGCATGCCAAGTGTGTGGCAAAATATTTCTTTATGATGTACCACT	273
	miR8025-5p	miR8025	ACATACTCGACATGCAATTAAATT	ACATACTCGACATGCAATTAAATTATATAAATCATCACTATGTTTCTCTTAATTAAGCTGAATTAATATATGATTCAACTTGCTTAAGAGAAAAATAATGTATACTTATACTAATTTAATTGCATGCCAAGTGTGTGGCAAAATATTTCTTTATGATGTACCACTACTCTATAATTTTGATCAAGTTTATGGAAGAAAATGTTATATGCTAACAATACAACGAAATGTTAAAAAATCATGAATGATTATGCTAGTTTATATAGTATTATTATTTGATATTCAATATTTTTTCGCCAACAT	24
	miR828a_1	miR828	TCTTGCTCAAATGAGTATTCCA	ATATTTGCATTCACTTCTTTGGGAAAGCCTCTTGCTCAAATGAGTATTCCAACAAATGTCTAATTGACATACTTTGAGATACTCATTTGGGCAAGAAGTTTTACCAGGAAGTTTGTACTTAGGTATATATATTGAGAGAAATTTTGAATTTCCTGTTTCTTGTAGTCGGGGGTGGATCTAGGAAAGAGCGAGGGAGTCGAACTCTTAGGTAAAAAAATATATTATATTTATTAGGTACTTTTTTTTAGTGTATATATATTGAGAGAAATTTTGAATCTTTGAATATGAGTCTGGAGATTG	51
	miR166a	miR166	TCGGACCAGGCTTCATTCC	TCTTCTCCCTAAAACAAAGGCGTAAGTTTTGGGGGAAATAAAATAGATAAGCAAAATATAAAATAAAAATCAAGAAATCAAAAGTGGAGATTTTTTTATTTGTGGGGAATGTTGTCTGGCTCGAGGAAATCTTCAATCCTGATCAATTTTTTTTTATACATATTTTTATAGTAATTACTATATTGTTACATAGATCTATACAATATTTATGATAGATCTATGAATTTTTGATTATATTGTTGGGTGTCGTCGGACCAGGCTTCATTCCCCTCAAAGATTATATCTACCACATAATTAATT	268
	miR166d-5p_2	miR166	GGAATGTTGTCTGGCTCGAGG	GGAATGTTGTCTGGCTCGAGGAAATCTTCAATCCTGATCAATTTTTTTTTATACATATTTTTATAGTAATTACTATATTGTTACATAGATCTATACAATATTTATGATAGATCTATGAATTTTTGATTATATTGTTGGGTGTCGTCGGACCAGGCTTCATTCCCCTCAAAGATTATATCTACCACATAATTAATTTCAGATCTTTACAAGAGGTAAGTCTTTTGATTAGTTTTTCATGTATTATGTGGACTATATCGGAAACAGTCTTTCTATTTTTGAGGCAGAGATAAGATTTGCGTA	21
	miR5368	miR5368	GGACAGTCTCAGGTAGACA	GTCGGGTAAGTTCCGACCCGCACGAAAGGCGTAACGATCTGGGCACTGTCTCGGAGAGAGGCTCGGTGAAATAGACATGTCTGTGAAGATGCGGACTACCTGCACCTGGACAGAAAGACCCTATGAAGCTTCACTGTTCCCTGGGATTGGCTTTGGGCCTTTCCTGCGCAGCTTAGGTGGAAGGCGAAGAAGGCCTCCTTCCGGGGGGGCCCGAGCCATCAGTGAGATACCACTCTGGAAGGGCTAGAATTCTAACCTTGTGTCAGGACCTACGGGCCAAGGGACAGTCTCAGGTAGACA	300
	miR167b-5p	miR167	TAAAGCTGCCAGCATGATCTGG	TTGAATCTGTATGTTGGTTTTTGAGAGGTTAAAGCTGCCAGCATGATCTGGTAAGAACAAAATCCAATTATTTTTCATCTATATTTTCTTTACAAAGAAGAAATGAATTTAAAGTTGATTTTTAAAAAAAATAAAAATTCTTGAGGTTTTTAATTTCCTTCTTTTGGATTTGAGAAAAGAAAATTAAATTTTGTAAGGATTTATTTCTTTGAAGAAAATATAGATAGATAGCTTTGGTTCCATCAGGTCATCTAGCAGCTTCAATCACTCACCAACAATACACACAAAGGAAGGAAAAAA	51
	miR167b-3p	miR167	AGGTCATCTAGCAGCTTCAAT	AAAATATAGATAGATAGCTTTGGTTCCATCAGGTCATCTAGCAGCTTCAATCACTCACCAACAATACACACAAAGGAAGGAAAAAAAAGAGCATCTAATTTTCACTTAATTCTCAATCACATTCATTTATCTCAGGTAATTATTTCTCTAATCTTTTTATTTTATGTAATTTTATTTTTTACTGTTGATTATCTTCTTCCCTTTTTTTTTTCTCTTCTCAGAATGTAACATTATATTTTATTTTCATCTAATACAATATATAACATATAATGATGAATAGTCAGGTGAATTCGGGACTCA	51
	miR8005a	miR8005	TTTAGAGTTTAAGGTTTAGAGTTT	TTTAGAGTTTAAGGTTTAGAGTTTGATTTAGGGTTTAGGGTTTAGGTTTTAAGGTTTAGGGTTTTGTGCTTGGGATTTAGGGTTTAGAGTTTAGGATTAAAGGTTTATGGTTTAGGGTTTAGGTTTTAAGTGAAAGGTTTAGGGTTTATGGTTTAGGTTATTGGGATTGGGATTAGGGTTTAGGGTTTAGAGTGTACGGTTTACGGTTTAGGGTTTATGGTTAGGGTTAGGGTTTAGGGTTTTGAGTTTAGGATATAGGGTTAGGTTTAGAGTTCTGGGTTTTGGGGTTACGATTTAGGG	24
	miR395b-3p	miR395	AAGTGTTTGGGGGAACTC	ATGATGAACAAAAATGGCTCTCAAGTCTATTGAGGTGTTCTCGAGAGTTTCCTTGACCACTTCATGATGAGGGTTTAATTACTTCGTGTTTGATGCCTTGCTGAAGTGTTTGGGGGAACTCCTGGGTTCACTTTGAAATTTACAAGTTAAGTAGAAGTGGAAGAGTACTAACGGGAGATGATGAATGAGCAATGATTCATTTCTATATCTATCAAGGTATTCTCGAGAGTTTCCTTGACCACTTCATGAGGGATTAATATCTTCATTTTTTATGCCCAGCTGAAGTGTTTGGGGGAACTC	121
	miR395a_5	miR395	CTGAAGTGTTTGGGGGAACTC	GGGTTGATTACTTTGTTGTTTGATGCCCTGCTGAAGTGTTTGGGGGAACTCCCGGGCTCACTTTGAAATTTACCCAAATGAATAGAAGTGCAAGAGTTGATGAACACAATGGTTATAGCACTAGCATTTCCATATTAAGTCATGAAAATATATATCCGACAATTAATTTTGAATATAAACATTTCTCATATTCCACTAAAAAGGGGGGAAATTAGTACTGATAAAAAAAACATGGAATAAATAAAAAGATATATGTATCAAAAATAATTTTTTTCATCAATGTATTCGTTTAATTTCTTG	51
	miR167d_1	miR167	TGAAGCTGCCAGCATGATCT	TGTTATATTGATAGCGTATACCACTATCAGTTGAAGCTGCCAGCATGATCTAAACTTACCTACAAATTTATATTGAGGCAAGATCAGATCATGTGGTTGCTTCACCCGTTAGTTCGTACTACGAAAAATAATCTTAACCCTATTTTTTTTTCATGAATATGCAGTGGGGAAAGAAAGAAACTAAATTTAAGGGTAATGTTATGTACTCTCTACTTTCTTAGATTTGCTTTTTTATGAGTTTCATTTGAATTGAGGTTTTTTCGATTCTTTCTTCACAACATATCCAATGTGATCCCATCT	51
	miR167d-3p_4	miR167	GATCATGTGGTTGCTTCACC	TTACCTACAAATTTATATTGAGGCAAGATCAGATCATGTGGTTGCTTCACCCGTTAGTTCGTACTACGAAAAATAATCTTAACCCTATTTTTTTTTCATGAATATGCAGTGGGGAAAGAAAGAAACTAAATTTAAGGGTAATGTTATGTACTCTCTACTTTCTTAGATTTGCTTTTTTATGAGTTTCATTTGAATTGAGGTTTTTTCGATTCTTTCTTCACAACATATCCAATGTGATCCCATCTGAAAAGGACGGTGTGTAGTACCTTGGCTCAAACTAATTTTCTATATACCTACTAA	51
	miR8032d-3p	miR8032	AGTGTGAGTTGGTGCGATTAGG	GCATGGTCGACTTGACTCCCGAGGTTTTCAGTGTGAGTTGGTGCGATTAGGCGTTTTAACCTTTGAATTTTGGCTTAAGTTTGACTTTGGTCAACATTTTGAGTAAACGCACTCGGATGAGAATTCCGTCAGTGCAGTTAGCTCCGGAATGTCGAGTTTGGTCTAGATTGACCCTTCTTTTGTGTCCCGAGGTTTTCGATATCTTTCCGAGCCCTTTTGTGGGTTTTGACTTAAAATGGCTTTTGGAAGTGGGACCAACTTTTTATCGAAATGACCTCTGATGGAAATTTCGACTACGTC	51
	miR390b-5p	miR390	AAGCTCAGGAGGGATAGCACC	TTCTTGTGGAATTGGTATAGAGAATCTATAAAGCTCAGGAGGGATAGCACCATGAATACATCTTAATAACTATCTATAGCGCTATCCATCTTGAGTTTTATGGCTTCTTCATGCTCGCTTTTGGTGCTTCATGTTGATCTTTCATGCTAAATATGTTATGATGATGTTTGCTTCAGTTGCAAGAGCGCAACATGTGATGTGCTGATTAATTAGGTACATTTTATAAGTTTGTATATGATACTTTGCGGAAGGTAAGAATGTTAAGTGACTGACTGACTGACCGCTAATTAGATAAGGTTG	51
	miR390-3p_1	miR390	CGCTATCCATCTTGAGTTTTA	TTTACCTACACATGTTGTTGAAATACTTGGTCAATTCCCATGTTACTTTTGCTACTATAAATAGGCCCCCCTTCCCTTTTAACACTTCCCAACCATACATTTATCTATATATCTTTTTATTAGTACTTCTTTCTCCTTTTGCCATTCATTTTCTCACTCAATATATATGTATATGTGTTGGAGATAAACTATGTATGTTGTTCTTGTGGAATTGGTATAGAGAATCTATAAAGCTCAGGAGGGATAGCACCATGAATACATCTTAATAACTATCTATAGCGCTATCCATCTTGAGTTTTA	300
	miR5303g	miR5303	ATATTTTTGAAGAGTCTGAGCAAC	CTACCTACTAACTTTCTACTCTAAAAAAAAAAAAAACATTACCTAAATTCCAAGAATACTTGTTTTTGATTAGTCTCCCATCTTTCCCTGGCTGAAAAGGACCATGTTCCATAAAAGCACCAAACCCCACAGATGAACAACCAGGGCCTAACATAATGGATTCAATCAATATCAAATGAAAATCAAGGTCAATAGAGAAGTGGTATATAATATTATATAGCTCGGACTCTCCAAATATATTGTTGTATCTGTGTCAGATCCGACACACACATATCAATATTTTTGAAGAGTCTGAGCAAC	300
	miR7981f	miR7981	AAGTGTGTCTCTGGAATTTCGGGC	ATGCCTGAAATCTCAGAGACACACTTACACTATACTAACGTCCTATTACCCCCCCCCCCTCCTCAACTTATTTTATAAATAATTTTTTACCCCTTTTCGGCCTACGTGGCACTATCTTCTGGGTCCAGCGCGTGTTAACATTTTTTTCAAGCTATCTGGTTGATAGTGCCACGTAGGCCGAAAAGGAGTAGAAAATTATTTATAAAATAAGTTGGGGGGAGGGCGGGTAATAAGACCTTAGTATAGTATAAGTGTGTCTCTGGAATTTCGGGCATAGATTGGGGGTACTTCTGCATTTTC	273
	miR8038a-5p	miR8038	CCTTGTGAGTAAGTTGAATCTC	TTTACTTGAAATAATATCTGCCACTGTCCCCCAAAATTTGCTTGAAATTTTAATGTTGTAAGCAATCAACTTCTTTATTTTGTGCTATCCTCAATTTTGTTTTATTTGTAGTACCTTCATATTCTTCAGCTCAGATGGGAAACGTAAATGATTCTGATTGGCAAGAAGAAGTTTTTCAAAAGGTTCAATTATCAGTATACTTAACCATCCAATTCGTTATTTTGTTATTATTCAAGTGAAACAGTTTCTCCTTGTGAGTAAGTTGAATCTCATGCTTGTTAAACTTCAACACGTGTTGCA	271
	miR8038a-3p	miR8038	GTTCAACTTGCTCACTTGGAG	TTTGTGCTATCCTCAATTTTGTTTTATTTGTAGTACCTTCATATTCTTCAGCTCAGATGGGAAACGTAAATGATTCTGATTGGCAAGAAGAAGTTTTTCAAAAGGTTCAATTATCAGTATACTTAACCATCCAATTCGTTATTTTGTTATTATTCAAGTGAAACAGTTTCTCCTTGTGAGTAAGTTGAATCTCATGCTTGTTAAACTTCAACACGTGTTGCAGAATGCGTCCCAACTTAACAAGCATGAGTTCAACTTGCTCACTTGGAGAAACTGTTTTTGCTTGAGAAGCACGTAAGT	270
	miR1446_1	miR1446	TGAACTCTCTCCCTCAATGGCT	TGAACTCTCTCCCTCAATGGCTGTTCATATAATTATGCTGCTACTTTGCAGCTTAATTAAATAGCAGCTTTGGGGGTTTGAGTCCAGAAAACTCTTGCTTTCTTAGTTAAGCGTTTCTCTTGGAAAAGAGGTCGAATCCGGTGCAGGATAGTTTGCTTCTAGTAGTTTTGGCTCGGAGGTCAGAAATCTGCAATCTCCTCTTTAACCACCCTACTAGGGGTCGTATTTGGGCCATGTTAAGTTCGGATTGGAATGAGGAGAATTTAGACTTCGTATGTGGACTTGGCAATTTCTTTTTAA	22
	miR8010	miR8010	ATAGGACCCTAGTTAAATTTAGGT	ATAGGACCCTAGTTAAATTTAGGTGTGTCTCTGAGATTTTTGGTCATATTCTAGGGGGACTTGTGCTTTATCCCATTACAAAACATAAAAAGATAAAATAATGAGTGCTATAATATAGTTTCAATGAGAAGTTATGGCCATGATTGACCACGTTCAGTTACTAAATAAAAGACAATTACTCCCAATGTTCTATTAACGTTTTCCTAGGAAGAGTAGGCAATAGAGGATGATAGGATAGGAGACAATTTAAAAATAAAATAATATTAAAATGCTCAAATATACTAACAATTTTATGAATAT	24
	miR169e-5p_2	miR169	TAGCCAAGGATGACTTGCCTTT	ATGAATTAGAAGAGTCTCTATTTGTTTAGTAGCCAAGGATGACTTGCCTTTCATCAATGCCTTGTAAAAAGGAAATTAATTAAAATCCTTTTTATGGTATTGGGAAAATGAGTGGCAAGCATCCTTGGCGACTTGACAAGCTCTTCTTTGTCATGTTAGTCCATCTTCTTCCTCTTCCGCTACGAGAAAATATGAAATTAGCTACGGAATTTATCAGTAATCTCTAGCTAATTCGTCGGTAAAAAGCTTTTAGCCAGTTGAATTCTTTTTTGTAATTCGTCATTAATCAGTAGCTAAATA	51
	miR169a_1	miR169	TAGCCAAGGATGACTTGCCTT	CATGAATTAGAAGAGTCTCTATTTGTTTAGTAGCCAAGGATGACTTGCCTTTCATCAATGCCTTGTAAAAAGGAAATTAATTAAAATCCTTTTTATGGTATTGGGAAAATGAGTGGCAAGCATCCTTGGCGACTTGACAAGCTCTTCTTTGTCATGTTAGTCCATCTTCTTCCTCTTCCGCTACGAGAAAATATGAAATTAGCTACGGAATTTATCAGTAATCTCTAGCTAATTCGTCGGTAAAAAGCTTTTAGCCAGTTGAATTCTTTTTTGTAATTCGTCATTAATCAGTAGCTAAAT	51
	miR169f-3p_2	miR169	GCAAGCATCCTTGGCGACT	TCATGAAAGGAACAATATAATTTAGCTATAGGGTCAAACATTTGAATTTTAGCAAGAATAATATTTTCATAACTATAAATACTGAACCAAGAAGCATATTATATATCCATAAAATAATTAAGCATAGAAAAAAATATGGCCAAGTAAATTAGGAGGAGAGGCCTTACATGAATTAGAAGAGTCTCTATTTGTTTAGTAGCCAAGGATGACTTGCCTTTCATCAATGCCTTGTAAAAAGGAAATTAATTAAAATCCTTTTTATGGTATTGGGAAAATGAGTGGCAAGCATCCTTGGCGACT	300
	miR9472-3p	miR9472	TTCACAATCTCTGCTGAAAAA	AGGCTTTTACTGTATGAATCTTGCATCATCATTTTCTTGAGAATAATATCAATCTCTTATTCTTAGTTTTTGAGAGATCTATGGGTTTTGATTTATAGCGATAGATCTTCTCATAGATCTAGTCGATTCATTTTTCAGTAGATGTTATGAATAATTGATAAATACAGGTGTATAAAGGTTTTGATATAGTCACACCCGTAGATATGTGTGATTAGACTAAGACCTTTGTACACTTGTATTCTGTTGCTATTCACAATCTCTGCTGAAAAATGATTGGCTAATTCTACGAAGAATTTAGAT	270
	miR157d-3p	miR157	GCTCTCTATGCTTCTGTCATC	ACTCAATAGGTTAAACCCACCCCCAAATATCTATCTATATAATATTTCTTCTAGCCCCAAATATAGCCCTAACACCCTTTCTCTTCCCCCAAACCCAAAAAAATCTTATTTTGTTCTTTGTATTTGATTTTTAGGTTATATAATTGAAATTGATAGGAAGAAAGGTTGGTGATAATTGTTGACAGAAGATAGAGAGCACTAATGATGATATGCTAATTTCATTCAGCAAAAGCATCTCACTTCATTTGTGCTCTCTATGCTTCTGTCATCACCTTCGCCCTCTTTCGTTTTTTCTTTTTT	270
	miR156d-3p_4	miR156	GCTCTCTATGCTTCTGTCATCA	ACTCAATAGGTTAAACCCACCCCCAAATATCTATCTATATAATATTTCTTCTAGCCCCAAATATAGCCCTAACACCCTTTCTCTTCCCCCAAACCCAAAAAAATCTTATTTTGTTCTTTGTATTTGATTTTTAGGTTATATAATTGAAATTGATAGGAAGAAAGGTTGGTGATAATTGTTGACAGAAGATAGAGAGCACTAATGATGATATGCTAATTTCATTCAGCAAAAGCATCTCACTTCATTTGTGCTCTCTATGCTTCTGTCATCACCTTCGCCCTCTTTCGTTTTTTCTTTTTT	271
	miR171b	miR171	TGAGCCGTGCCAATATCACAT	GATGCCACTGAGATTAACAAATAAAACTATACATATTCCATTTTGGACTTATTCTATGAATTTGCTTCTATATATGACTACTACTTTTTGTTCAAACATGTATATACTTCAAAGTAATTTTGGCTTTTGACCAAATCATTATGTTTAAAATCAGACCAACTTATCGAATTAAAATATTTTGAGGTAATTTTACGTTTTGATTGATCAACTAATTGAGATGTTGGTGTGGTTCAATTAGATAACAATCTCCACATAAGATTATAGAGTTTGTTATTTGATTGAGCCGTGCCAATATCACAT	300
	miR171f-3p	miR171	TTGAGCCGTGCCAATATCACA	TGATGCCACTGAGATTAACAAATAAAACTATACATATTCCATTTTGGACTTATTCTATGAATTTGCTTCTATATATGACTACTACTTTTTGTTCAAACATGTATATACTTCAAAGTAATTTTGGCTTTTGACCAAATCATTATGTTTAAAATCAGACCAACTTATCGAATTAAAATATTTTGAGGTAATTTTACGTTTTGATTGATCAACTAATTGAGATGTTGGTGTGGTTCAATTAGATAACAATCTCCACATAAGATTATAGAGTTTGTTATTTGATTGAGCCGTGCCAATATCACA	300
	miR8028-5p	miR8028	TCCTTATGCTACAATTGTGAACAA	TGAAGTATAACCCAAACTTACGGTTTATCCTTATGCTACAATTGTGAACAAAAAAATCCTTTAACTATTCCAAGATTTTTGTAATAAAAGTTAAGAGAAGAATGTTTATTGCAAATTTTGGGATTGTTAAAGGATATTTTTTTTTTGTTCATAATTATAGTATAAGGATGTACCTAAGTTTGGGTTAACTTCAGGGATGATTTTAGCCTAGAACACTTTACTAGTATATAAGAAGTAGAATTGTAATTAACTCAATTCACCATGAAGTGCTCTGAGAATAATTTAAGAATAAATAAGAGT	51
	miR8030-5p	miR8030	TTGGGTTGGTTTGGTCTCGGGTT	ATAAAATTTTAAAATTATATATATAAATTTGGGTTGGTTTGGTCTCGGGTTGATTTTTTTAGTTAAAACCAAACCAACCCAAATATAGTCGGGTTTTATTTTTCAAAACCAAACCAAGTCAAACCAAACCATTAGTCGGGTTTTTTTTCTGGGTTGACTCGATTTGCGATTTGATTTGATTCTCGGTTCGGTTTTATACACCCCTAAATGTAGAGATATTAATATAATGAAACAATATTGTATTAAAGTGAAACCAAGCAATAAATATGAGCAATTTAGTTAAATTATATTTTTTAGTTA	51
	miR7979	miR7979	AGGTACATGAACTCTAACGAGGCA	AGAAATGAACAACACTCAGATACGTCCAGGTACATGAACTCTAACGAGGCATTATCAATCCCAAGTTTTAAAAATCTTTGTCCTACTAAAGTTTTGCCTAAGCATTTGTTAGATTCAAGACTTGCCTCAACGTTGTTTTTTGATGGAATTCGTTGATTTAAAGAGACTAAAGGGATTATTGTTAATACTTTTTTCGAGCTTGAATCGTTTTCTCTTCAGGCTCTTTGGGGTTCTAAGATGGTTCCAAAAATTTATCCAGTTGGTCCAGTGGTTAGTTTTGAAAAAAGTGGCCATTTTAGA	51
	miR171b-3p_3	miR171	TTGAGCCGTGCCAATATCACG	CCAATTTAATGCTACTACCATTACCATTTCCCTCTCCTTTCTCCTTAAGTTCAATTCTTCCCCCTCACTATTTTCACAATTTCCCCCCCTTTCTCTTTCTCTTTCATATTTCAAAATCTTAGTATAGTAATAACTAATGAAATTTGAAGTCAAAAGGATATGTTTGAAGTTGCAAGGTATATCATACGAGATGTTGGTGCGGTTCAATGAGAAAGCAGTTGTTAAATAAGTTTTGACCCTACTTTTTGATTGAGCCGTGCCAATATCACGTGTCGCTACTCTATAAATTCTCTTTTTTTT	270
	miR171b-3p	miR171	TTGAGCCGTGCCAATATCAC	CCAATTTAATGCTACTACCATTACCATTTCCCTCTCCTTTCTCCTTAAGTTCAATTCTTCCCCCTCACTATTTTCACAATTTCCCCCCCTTTCTCTTTCTCTTTCATATTTCAAAATCTTAGTATAGTAATAACTAATGAAATTTGAAGTCAAAAGGATATGTTTGAAGTTGCAAGGTATATCATACGAGATGTTGGTGCGGTTCAATGAGAAAGCAGTTGTTAAATAAGTTTTGACCCTACTTTTTGATTGAGCCGTGCCAATATCACGTGTCGCTACTCTATAAATTCTCTTTTTTTT	269
	miR171b-3p_2	miR171	TTGAGCCGCGTCAATATCTCT	TTGGATTATACTACTCCTAGAGTATATATTATGTTATAGCCCAACTTCTCCAAAATAAAAACACCAAAGTTTGGATTTTCTTTTTTTTTGAAAATTATTCTGGAAAAAGAAGGTTAACTAGCTAATTCAAGGTGAAGCTGGGAATTGAAGGTACGTACTTTATAATACGTTTAGGAAGATATATATAGATATTGATGTGGCTCAATCTGAAGACATGGCTAAATATGTAATTAGCCATGTGATTTTGGATTGAGCCGCGTCAATATCTCTCTCTTCCTATTTCCAGTTACTTTACATGTC	270
	miR171b_2	miR171	TGATTGAGCCGTGCCAATATC	ACTCCAATTTAATGCTACTACCATTACCATTTCCCTCTCCTTTCTCCTTAAGTTCAATTCTTCCCCCTCACTATTTTCACAATTTCCCCCCCTTTCTCTTTCTCTTTCATATTTCAAAATCTTAGTATAGTAATAACTAATGAAATTTGAAGTCAAAAGGATATGTTTGAAGTTGCAAGGTATATCATACGAGATGTTGGTGCGGTTCAATGAGAAAGCAGTTGTTAAATAAGTTTTGACCCTACTTTTTGATTGAGCCGTGCCAATATCACGTGTCGCTACTCTATAAATTCTCTTTTT	270
	miR477b_1	miR477	TCTCTCCCTCAAGGGCTTCTC	TCTCTCCCTCAAGGGCTTCTCTTCAAGATCCTTATAAACATGAAAGCATGAGGGAGAGAGGAGTTCTTGTAGGGTGAGACAACAAGAAATTCCTTGCTCACTTCCCATGGCAACATACTATATTTTATTTAATTATATTTTCGACACATTTCTTCATGTGTGGATTTTGATGGTTGTGGTGAGATGCAGGATTACTATTTATTCTAATAGTATGTTGAAGTGTGTGATATATCATGTTATCTAAAAACTTAAGCTAATTGTTTAAAAAGGTACTTATATTTATTTTACGGTATTATTTTA	21
	miR477-3p_2	miR477	AGTTCTTGTAGGGTGAGACAAC	ATTTTCTTACAAATTAAAATGGAAAAGTATAAAACTTTTCCACTCATGTCAAGTGCCATGGTTCCTTTTTAACACCCCTTTGATTGATCTCTCTTTGCTGCCTATAAATAAGCTACTCTATTCCACTTCTAAAAACATATAAAAGCTCATTATTATTAGAAGATTTTCAAGCTAGGCATTGCTTGTTGTCTCTCCCTCAAGGGCTTCTCTTCAAGATCCTTATAAACATGAAAGCATGAGGGAGAGAGGAGTTCTTGTAGGGTGAGACAACAAGAAATTCCTTGCTCACTTCCCATGGCA	271
	miR477b-5p_2	miR477	CTCTCCCTCAAGGGCTTCTCT	CTCTCCCTCAAGGGCTTCTCTTCAAGATCCTTATAAACATGAAAGCATGAGGGAGAGAGGAGTTCTTGTAGGGTGAGACAACAAGAAATTCCTTGCTCACTTCCCATGGCAACATACTATATTTTATTTAATTATATTTTCGACACATTTCTTCATGTGTGGATTTTGATGGTTGTGGTGAGATGCAGGATTACTATTTATTCTAATAGTATGTTGAAGTGTGTGATATATCATGTTATCTAAAAACTTAAGCTAATTGTTTAAAAAGGTACTTATATTTATTTTACGGTATTATTTTAC	21
	miR477d	miR477	CTCTCCCTCAAGGGCTTCTC	CTCTCCCTCAAGGGCTTCTCTTCAAGATCCTTATAAACATGAAAGCATGAGGGAGAGAGGAGTTCTTGTAGGGTGAGACAACAAGAAATTCCTTGCTCACTTCCCATGGCAACATACTATATTTTATTTAATTATATTTTCGACACATTTCTTCATGTGTGGATTTTGATGGTTGTGGTGAGATGCAGGATTACTATTTATTCTAATAGTATGTTGAAGTGTGTGATATATCATGTTATCTAAAAACTTAAGCTAATTGTTTAAAAAGGTACTTATATTTATTTTACGGTATTATTTTAC	20
	miR166d-5p_1	miR166	AGAATGTCGTCTGGTTCGAGA	AAAAGAGAGAGACATGTAATATTGTTGAGGAGAATGTCGTCTGGTTCGAGATCTTTCATAAGAAGGTAACATGCAATGAGATGATTTCGGACCAGGCTTCATTCCCCTCAACTCTGATCCAACAAGTATGTGTTCTTAATTTTTTATTTTATAATTTCTTTTAGGGTGTGTTTTTTCACAAAGAAAAATATGTTTCTTCTTGTTTCATCGACTAGACCAAAAACGTGATTCAGTTGATAAAGAGGTGCACTTGACTTTGATTCTCATGTTGGCCTTTACTTCGGCTACTAATATAAGGGT	51
	miR166m_2	miR166	CGGACCAGGCTTCATTCCCC	AAAGACGTGCGAAAACAATAACCATCTCATCAAAAAGTTTAAGTCGTACATACACACCTTTTTGCAGGTGGATTTGATTATTTTATATAAGAATCTGTCTTCATTTCCATGGCATATAACTAAAGAACCCTAAGAAGAGTAATATATTTGAACATACTCTCTATCTTTTTCTCTTCTCTAAAATAACAACATAAAAAGAGAGAGACATGTAATATTGTTGAGGAGAATGTCGTCTGGTTCGAGATCTTTCATAAGAAGGTAACATGCAATGAGATGATTTCGGACCAGGCTTCATTCCCC	300
	miR166-3p	miR166	ATTTCGGACCAGGCTTCATTCCCC	AAAGACGTGCGAAAACAATAACCATCTCATCAAAAAGTTTAAGTCGTACATACACACCTTTTTGCAGGTGGATTTGATTATTTTATATAAGAATCTGTCTTCATTTCCATGGCATATAACTAAAGAACCCTAAGAAGAGTAATATATTTGAACATACTCTCTATCTTTTTCTCTTCTCTAAAATAACAACATAAAAAGAGAGAGACATGTAATATTGTTGAGGAGAATGTCGTCTGGTTCGAGATCTTTCATAAGAAGGTAACATGCAATGAGATGATTTCGGACCAGGCTTCATTCCCC	300
	miR169e_3	miR169	AGCCAAGGATGACTTGCCGG	AGCCAAGGATGACTTGCCGGACCATAAATTGCAAGGATTTTCTAATTCCGGCAAGTTGTTCTTGGCTATAGTTTGCTCTCTTCTTCTCATGTCATCCTCATTAGACCTATTTTTTCCTACTTCTCCAAAAGAATTTTCAATTTCGAGGGTGTATTATTTGATATGAAGGATTCTTAAAATCACTTTTTAAATATTTTGTACGTATTATCTAAAAAATCGTTTGTGTATAACATAGGAAAACACTATAGGAGTTGAAGGTGGGGTAGGGGTGTTATGATGGGTGAAATCAGAGATGTATTG	20
	miR169v_1	miR169	CAGCCAAGGATGACTTGCC	AGTCATTGCATGAAGAGGTTGGGAGTGGATTGCAGCCAAGGATGACTTGCCGAGATGTTGTAACCCAATATTGCAATGACGTATCGGCAGGTCATCTTTGGCTACATTTTACTCTCTCATATTCATGTAAAGCTCTACAAGACGTATATGTATGTATATATGTATAGTCGGAAGTCATTGAGTGCACGTGCACTCACAACCCAATTGGAATAAAGGTATACATATCGTCGATTCATTTCGAGTTAATTTATGTTCATATAATCTTGTAGTAAGACTATGTAAGACACATACATATAATTT	51
	miR169b-5p	miR169	CAGCCAAGGATGACTTGCCGG	GTTTGCATGAAGATGAAGAGAGTGAAATTACAGCCAAGGATGACTTGCCGGACCAAAAGTTGTGAGCATTTTCTGGTTCCGGCAAGTTGTTTTTGGCTATAAGTTTGCTCTCTTCTTTTCATGTTATCCTCGTTAGACCTATTTTTTTCTATTTCTCTACTAGAATATTCAATTTTGAGGGTCTTGAACATCTTCAATTATGAGCACGATCACTTTGGGTAGTGAGGTCAGGCCATTTGGGCAATTCGCCCTTTTGGTTAGGTGATTGCTAGTGTGGAGTTTATACTTCTTTCAATGTTT	51
	miR6023_1	miR6023	TTCCATGAAAGTGTTTTTGGAT	AGAGGTGGGAGATTTCAGAAGGGATTAGACCGGTAGAACTTGAATACGACAAATCAAGATGCGTCAAGTTAGAAAATCCACCAAATTTAGGTGAAATGTTGGATGCAGAGAAATCATTACCAGACAAATCAAGCCTTCTAAGATTGGAGAGTTGAAAGAGGCTACTGTTGAAATGAAACTTGCCTTGAAGCTGGCTACAAGTGAGGTTGATCTTAATCACTTGTCGTGTCGTCCCATCACAATGAAATCCATCCCATGAGCAACAATTTGTGCTTTTGTTCCATGAAAGTGTTTTTGGAT	300
	miR399f_1	miR399	TGCCAAAGGAGAATTGCAC	AAAACTTGAATATGTATTAATCTTTTTATTAAATAAACATAAATAATAGATTTTGAATTACCTGATAAATTATTAATTATACGAGCTATGATAAAATTCTAAATTCGAACCTATAAAGTTCAAATTTTGAATTCGTCTCTGTTGAGGTTGAATGACTGAGGACAAGAATGACAGGGCAATTCTCCTTTGGCAAAGATAATATAATGCCATGCAAAACATATATATATATAGGGTTTGCATATATTCATTTGCCAAAGGAGAATTGCACTGTTATTTCTTACTCCCCATTTTACTTCTCCT	268
	miR399_1	miR399	TGCCAAAGGAGAATTGCCC	TATATATGTTTTGCATGGCATTATATTATCTTTGCCAAAGGAGAATTGCCCTGTCATTCTTGTCCTCAGTCATTCAACCTCAACAGAGACGAATTCAAAATTTGAACTTTATAGGTTCGAATTTAGAATTTTATCATAGCTCGTATAATTAATAATTTATCAGGTAATTCAAAATCTATTATTTATGTTTATTTAATAAAAAGATTAATACATATTCAAGTTTTGAGTTAAAACTATTGAATTGTCATATGTTATTCTTCTTGTTCAGTACTCAAACAAACAAGTTAGCAACACATAGAG	51
	miR399d	miR399	TGCCAAAGAAGATTTGCCCCG	GACTGGAACATGACATAATTCGAGTATTCCTTACTCATGGCATATGCATTGAAATATACTCCTATGAAAGAATACTACATTTTTTTTCTCTTTACTATAAAAGAGTTTCAAATTATTTAGAAATGTTCATCAAAACAATTGATGAAAAGACACAATTTTAAACGGTGTGTGGATGCATTACTGGGCTAATCTTCTTTGGCAAATAGCCACATCTTCACTATATTATTTAGTGCAAGTTTGGTCATTTTTTGCCAAAGAAGATTTGCCCCGTAAATCATTCATACAATATATTATAACATG	270
	miR399a_6	miR399	TGCCAAAGGAGAATTGCCCTG	TATATGTTTTGCATGGCATTATATTATCTTTGCCAAAGGAGAATTGCCCTGTCATTCTTGTCCTCAGTCATTCAACCTCAACAGAGACGAATTCAAAATTTGAACTTTATAGGTTCGAATTTAGAATTTTATCATAGCTCGTATAATTAATAATTTATCAGGTAATTCAAAATCTATTATTTATGTTTATTTAATAAAAAGATTAATACATATTCAAGTTTTGAGTTAAAACTATTGAATTGTCATATGTTATTCTTCTTGTTCAGTACTCAAACAAACAAGTTAGCAACACATAGAGAT	51
	miR7984b-3p	miR7984	GGTCTTTCATAAAATTTGGTATCG	CAAATAAGGCCTAAGACTCTAATGGGGTAGATCTCTTTGTTTTAAAAAAAAAGAGCAATAAAAAAAGGGAAAAAGGTTTGAACTTTGACTGAAATTGCTGTAATAATACCGAACTTTGGAAATGACCTTTTACCCCTGCACTATTTAATAGTTATTTTAAAGGTATATATGTGCCCAGGTGGACATCATAAAAATTGCATCATTATAAATAGTAACGTGTCTACGTGAGCAAATATATACCTTTAAAATACACTATTAAATAGTGTAGGGGTAAAAGGTCTTTCATAAAATTTGGTATCG	300
	miR171c-3p	miR171	TGATTGAGCCGTGTCAATATC	TGAGCAGAGCAGAGTTAACATGCACCAAACCTGCAGAGTGAAAAGCTGTTACTATAGTTAAATGCAGTGGCCCCTTCTTTCTGCTTTGGTAGTGCAAGGTTTTAAATGCACTCCACATAGTATATCTCTTCTTAAACACATTCACAATTCATCAATTCTCTTCCAAAAACCCCCTTTTGTTACTTTGCTTTTGCACTCAACAAGAGAACATTTCTCTTTCTCTATGAAATAGTAACTCTGATATTGGCCTGGTTCACTCAGACACACACTATTTTGCTTTGATTGAGCCGTGTCAATATC	300
	miR7991a	miR7991	AGGAGGTCGGAATTTTTAATGAAT	ATTTTTACCGACATTCGGAAGTCGGTATTATGAAATATTTAATTGAGAAAAAATTCCGACCTCAGGAGGTCGGAATTTTTAATGAATTACAATAAAAACCGACCTCTTGATGTCGGTATTATTTTCTCAATTAAATATAAAAAATACCGACCTCATGAGGTCGGTATTTTAATTACATACTATTTAATTTTTACCGACATTCGGAAGTCGGTATTATGAAATATTTAATTGAGAAAAAATTCCGACCTCAGGAGGTCGGAATTTTTAATGAATTACAATAAAAACCGACCTCTTGATGTC	87
	miR8007a-3p	miR8007	CGAAAAATGAAAAGTGCCACATAA	ATTTTTTTTTAGTCCATCTAAGAACAATGTACTCCATCTGTTCATTTTATGTGGCACTTTTCGGATTTCGAGATTCAAACAAGTTTATATTTGATCGTAAATTTTTTATAGATTTTTTAAACATTTTGAATTATCAATTATTGTGACTTGTAGTACTTTTTACGTAATTTACAAGTATATAAATTTCATTTCAAAAAAATTACAGATTTCATGCGCAAATTTTAGGTCAAACTTAACATGTTTGACTCTCGAAAAATGAAAAGTGCCACATAAATTGGAACAAAGAGAGTAAGTAATTGT	273
	miR845	miR845	TGCTCTGATACCAATTGTTGG	TTGTCAAATTCATTGTATTGCCGTCGAGTTTTGACAACGACCCTTGTGACATCCCTATATTTTACCTCTATAGATGGCACATAGGGACCCTCACAAATAACATCCCACAGCTCACATTCTTCAGCCATTATGAAGTCAAACATACAATGTTTCCACCACCGATAATACTGACCATCAAACAAGTGTGGCCTTGTTGAAGACTGACCTTCTTGCCATCTCAGTGGAGCAGCCATTCTTTCCATAGGAATCTCTCTTGGTTTTAACTAGCTAGAGAGCACCTGCTCTGATACCAATTGTTGG	300
	miR8006-5p	miR8006	TAGTTTTTGGACGACAGGGGCACC	GACAAATATACCCTCGAACTATTGTAAATGGTATGCAGATACCCTCCGTCATACTTTTGGGACATTGGTGCCCCTGCCGTCCAAAAACTAGAGCACATGATATACCCTTTATACTCTTTATACTAACGTACATACACGTGTCATAATCTTATCCACCGACTCGACATATACTAAATATCGGATCGATGGATAAGATTGTGCCGCGTGTCCCTATTTAGTCTTCCGTTAGCGTGAATGGCATATATGCTCTAGTTTTTGGACGACAGGGGCACCAATGTCCCAAAAGTATGACGGAGGGTA	273
	miR6023	miR6023	TTCCATGAAAGAGTTTTTGGAT	CATCCCAAGAGCAACAATCTGTGCTCTTGTTCCATGAAAGAGTTTTTGGATATGACTGAATCCATTGGCCTCTTATGCCGATACAATAATCAGAAACATTAGGAACTATTGTAAACATGTGTTTGAATTGTAGAAGAGAAAGAGCTTGATTTTTGGGGCATAAATGAGGTGAGGATGAGGAGAAAACAAGTTGAAAGACAAAGGGATATATCATAAAAAATACAAGGTTTACGTAGCCCATTTCTGCACTAAAATGTTCAAAACTAATTAAGTTGATAGAGAAGAAATCAAGAAATGTTT	51
	miR7987	miR7987	ACACTAGTTGATCTTATTGATGAC	TCGAGTGTATGTTTTGCATAAGTACCAACACTAGTTGATCTTATTGATGACAAAATTGATTTTCTTGCAAGATCGATTTGTGTCCATCTAGTGTTGACACTTAGCTTTAAATTTAGAAATAATATATTTATTGATGGATTTAGGTTGTTGGAATTAAGTCAAAACTAAACTAGTTCAATTGAAAAACTTGTTAAGTTGTTTAATAAGTTCAAATAAATAATGTGGTTTAGTTGGTAGATTTAAGTTGTTAGGAAAATTAAGTCTAAACTAAACTAGTTAAAGTTGTTAAGTTGTTTAAAT	51
	miR1919c-5p	miR1919	TGTCGCAGATGACTTTCGCCC	GCCTTTGATGTTCACATCTTCCGGTAGTCCTGTCGCAGATGACTTTCGCCCTTCTCATTCAGCCCATTTCTCTAAATCTAATTAATTTGAATTCAATGTGGTAGGACGAGAGTCATCTGTGACAGGATAATGGAAGATCTAGTTATCAAAGGCTTATTGGGGCGTTCTTTTTTTCATGTTGAGTTCGTAGCATAATCTCCAACTTTTGCAGAGTATTGCAACACCGAAGTAGCACAGGCAGACATTTCATTACCATTACTCTATTAGATATTGAATTGAGTATTATTTGCTTTCGTTTTG	51
	miR399i-5p_1	miR399	GGGCTACACTCTATTGGCATG	GGGCTACACTCTATTGGCATGCAGCATTTTTTGTGGCTCCATACAGCAGCTAGCTTGACCAAATATTTGAGTGACATGTCAAAGTAGAGTTGCCCTGTTACTGTTTAATGTAATGTAATTAGACGCACGTTGGCCCTTGAGACTGTGATGCAGAAATAAACTTTAACTGGACTCCATGTTTTAGATGGAAATGTCAAGGCCAAAAATATTAATTCTTCCAAAATTCAACATTGAAAAAACCTATCATGAACAAAGTTTACTTTATAATCTGTGTTTGGTGCAGGCTTTTAACTATATATA	21
	miR399j_2	miR399	TGCCAAAGGAGAGTTGCCCTA	ACACAGCATAAAAATAAATGATAGGATATGCCGATTCTCTAGGGGTTTATTCCGTTTCTTAAATTGAGAAGGAACGCTCTATAAAAACATGGAAGGCTCTATTGTGATGAACCAGAAGCAGAAAAATGACAAAGAAAAGTTCGTGAATGATAGTAATAATAAAGGAAATAGTGATAGGGCTACACTCTATTGGCATGCAGCTTTTTTGGTGGCTCTAAGTAGCAATTTGATCAAATATTTGAGCTGATATGCCAAAGGAGAGTTGCCCTATTACTATCTCTACTTAATGTAATGTAATTA	270
	miR395a_1	miR395	CTGAAGTGTTTGGGGGAACTCC	TCAAGTCTATCAAGGTGTTCCCTAGAGTTCCCTTGACCGCTTCATTAGGGCTTACTTGTTGTTTGATGCCCTGCTGAAGTGTTTGGGGGAACTCCTGGGCTCACTTTGAAATTTTACACAAACAAATATAAGTGTGAGAGTACTGGTTGTGGAAAATGAACACAATATTTTACGTATAAATCTATCAAGGTGTTCCCTAAAGTTCCCTTGACCACTTCATGAGGGCTTACTTCGTTGTTTGAAGCCCTACTGAAGTGTTTGGGGGAACTCCCGAGTTCACTTTGAAAATTACATAAACAA	95
	miR395b_3	miR395	TGAAGTGTTTGGGGGAACTC	ACATAGTGTCGCCCCATATCTTAGTTCAAACCCCACTTTCACATTTGGCATGGAATTTTCTTAGCAAAACAATGTTATAAATAGGAATGTATGTTGTAACAACATCAAACAAACAAGTAGAAATGCAAGAGTATACTACTAACTAGTTGGAGATGATGAACAAAAATGGTTTTTAAGTTTATCAAGGTGTTTCCTAGAGTTTCCTTGACCGCTTCATTAGGGTTTAGATTGTTGTTTGAAAAGCCTTGTTGAAGTGTTTGGGGGAACTCCAGGGCTCACTTTGAAATTTACACAAACGAA	269
	miR7981a	miR7981	ACCCCTTTTCGGCCTACGTGGCAC	TCGAACTTATTTTATATATAATTTTCTACCCCTTTTCGGCCTACGTGGCACTATCCTTGAAAAAATTGTCAATACGCGCTAGGCCTACAAGATAATTCCACGTAGGCCGAAAAGGGGTAGAAAATTATACTCCCTCCGTCCCTTTTTAGTTGTCCACTTTAGAAATGGCACACAGATTAAGGCAACAATGATTAGCACAGTGAAGTTACAATTTTACCCTTATGACAACTTTTCACTTCAAAATTACAACCACTTATTTGAATTCAAGTGAAATAAATTGGAGGGAAACAACATACACTT	51
	miR1919a	miR1919	ACGAGAGTCATCTGTGACAGG	ATGTGGTAGGACGAGAGTCATCTGTGACAGGATAATGCAAGATCTAGTTATCAAAGGCTTATTGGGGCGTTCTTTTTTTCATATCGAGTTCGTAGGAAAATCCCCAACTTTTGCAGAGTAGTATTGCAAAACCGAAGTAGCAGCACAGGTAGACATTTCATTACTATTAGCTATTGGATTGAG	31
