# Supplementary material for: A comparative analysis of small RNA sequencing data in tubers of purple potato and its red mutant reveals small RNA regulation in anthocyanin biosynthesis
Source: PeerJ. 2023 May 19;11:e15349. doi: 10.7717/peerj.15349 (PMC10202107; doi:10.7717/peerj.15349)
Supplement: Table S5 [file peerj-11-15349-s005.xlsx]

## Sheet: Sheet1
	Table S5 Total novel miRNAs across the six libraries
	miRNA ID	Strand	Sequence (mature)	Sequence (star)	Sequence (precursor)
	novel_mir1	+	AGTTGGCTGTTGCTCAGGTTTTAG	AGTAGACTTAGTGCCCATTGCCTG	TTGGTGATCTGGATATTTGTTTCCAATAGTTTTGCAATATCTGGTCATTATTTCTGATGAAATAAAATTTTTCCTTATAGCTCTTGTAGTTGGCTGTTGCTCAGGTTTTAGTAGACTTAGTGCCCATTGCCTGAGTTCTTCCAT
	novel_mir2	-	CTTTGCAACCGAAGTGAGCCATGTCGAA	GAAACCCTTATTTTGTGTTGCTGAGACA	CGTTCGAAACCCTTATTTTGTGTTGCTGAGACATGCCCCTAAGGAGAAAGTCTTTGCAACCGAAGTGAGCCATGTCGAACT
	novel_mir3	+	GGGGGGAAGGCGAACGGGAAC	CGAAAACCCGAACCGCTTGACTGACCCCTT	TAATGGACTATGAGGGGGGGGAAGGCGAACGGGAACCGACCGAAAACCCGAACCGCTTGACTGACCCCTTCATAGTCCATTC
	novel_mir4	+	AGTAAGTAATTTATATGAGTCTTGGCCAC	TAAGACTCACATAGATTACTTACTCC	CCTCTTCCTCTTAATCTCAAAATCCATTGGCAAGAGCTTATATAAGATGCTCACTCGAGTAGCCTTACAGTACTTAATATCACATGTTCTATGGAGTAAGTAATTTATATGAGTCTTGGCCACTGATCACATGTTGATCTTACGGAGTACAATGGCTAAGACTCACATAGATTACTTACTCCTTAGAATGTGTGATAGAAGTTTATGTAAGGACTGCAAGGATATCTCGAGTGAGTATCTTATTATCCAACATAAGCGTTTGGCAATGGATTTAGTGATTAAGAGGAAGAGA
	novel_mir5	+	CTGTACTTGGCTCCGTTTGTAAGTTGGACC	CTACTTATCAATTTATCAGCTGAACC	CTCATATATACTCTTGGCGGAATGACCTGGGAGACCCCTGTACTTGGCTCCGTTTGTAAGTTGGACCCTCCTACTTATCAATTTATCAGCTGAACCCCTTAACTCATCAAAACGTAATATTTTGAACCCTTTTTTCATCTGACTAGTGTGTGTGAA
	novel_mir6	-	CGCTTTTATGTTTCACAAATCCTTCAGCA	TGTAGGATTGATGTGAAACAAAGAGGTTAG	AGCACATAGTGTTGTGAGTTTCCATGACCTTTGAATTAGGCTATCTTTATTTGTGTTTTGGTGTATTATCTAGAGCATGCTTGCTTTATTTTCTCTTCATTTTGCATGGTTGTGGGTTGCTGTAGGATTGATGTGAAACAAAGAGGTTAGATGTGAAGAATCATTGTGAGATAGTTTAATGTGTGTACCAAAGAAAACGCTTTTATGTTTCACAAATCCTTCAGCAATCCATAACTATGTTAATGTTGGGACTAAGAATTTTCTTGTTCTCAAGTGGTGCAAAATAAAGCAAGCATGGCTTTAGGTAATTGCTAAAAGTATTGAGTATGTCTATGCA
	novel_mir7	+	AAAAGATTGCCGACTGGATGCTCCTAC	GAGTGGTGGCAACCCTCTTGA	GCAACTCAAAGGACATAAGACTTCTTGGTCAAGCCAAAAAGATTGCCGACTGGATGCTCCTACCCCACCATGCCTAACCCTTTATCTTACCTTAAGAAGAAAGAGGAGGTAGGTATGAAGCGTGGGACAGAATGCAAGAAGTGCATACAACAGATAACCTTAACCTTAAGGAGTGGTGGCAACCCTCTTGATTGATCAACGCGAGTGGCCGCTTTCTTGATTGATCAACGCGAGTGGCCGCTTCCTTTCCGTTGG
	novel_mir8	-	GCGGCCCCTGCCCAAATTTAAAA	TTTGTTGCTGTGGGGGCCTGCGTT	AGGGTCAATGGGCTGGATTAAATACTTACCTGGACGGGGTCAATGGGTGATCAATAAGACTCATGGCCTAGGCTTGTGACCTCCATTGCACTTTGGAGGGGTGCCTGCCTAAGGTCGGCCCAAGTGGTCGAGCCTACGTCATAATTTGTTGCTGTGGGGGCCTGCGTTCGCGCGGCCCCTGCCCAAATTTAAAACCAAAAAGTTTTCTTGTGCATTAATGCAACTCTGGCCACACAGTTTTCTATCTTAGTCTTGGCTTC
	novel_mir9	+	TCGACTAACCCATGTGCAAGTG	ACTTGCACATGGGTTAGTCGATC	TCTGTTGGGGTTCCCCCGACCCTTAGGATCGACTAACCCATGTGCAAGTGCCATTTTCATGGAACCTTTCCCCTCTTTGGCCTTCAAAGTTCTCATTTGAATATTTGATACTACCACCAAGATCTGCACCGATGGTCGCTCCGCCTACGCTCACACCTAAGGTTTTGCAGCGATCGCCGCACCCTCCTACTCATCGGGGCCTGGCACTTGCCCTAACAGTCGGGTGTAGGTCGCACGCTTAAGTACCATCTAGCCCCAAAAATGGATGGCGCTTAAGCGCACGACCTACACCCGGTCGTCGAGGCAAGTGCCAGGCCCCAATGAGTAGGAAGGCGCGGCGGTCACTGCAAAACCTTGGGCGTGAGCGGCCGTCGGTGCAGATCTTGGTGGTAGTAGCAA…
	novel_mir10	+	AAATGCTTTAAAGTCTTCCACTAGATCGAG	GAGCTAGTGGTTTCCATTAAAGGTT	TATTAAAAGATTGGATATGAGTCTTCCTTGAGCTAGTGGTTTCCATTAAAGGTTAAATGCTTTAAAGTCTTCCACTAGATCGAGGGTTCGAGACTCGTATCAATGATACTACACAAGTTTAGCTAGTACTTGAGGTATTTTAAAATACCTTTTTTCAAGGGCATCTTTAGTGGTACTATTATTTTCTATTTCTTCTTTTGGTC
	novel_mir11	-	TATCCCTTGGAAAGCTGGCCCGGACACC	TTAGTTTGGAACTGTGAGATGCCA	AGATTGCAGCCTTGAGTAACTGATTTGGCTAGGCTCATTATTGTCTACTTTGTGCTAAGAAGGTTCACCAAGTTTATTGTGGCCAAATAATGATTGTGTTAGTTTGGAACTGTGAGATGCCATTACCTTGTATCTGTTACTGATGGGAGGTGGCAGGTATCCCTTGGAAAGCTGGCCCGGACACCATAGTCATAAAAAAAAAACTGTGAGATGCCATTTTTTCAGTCTAAATCTAAATGAGCTAGTCAGATTATGTGGCTCTAGTAGGTGACAGAAGCTGCAATCA
	novel_mir12	+	AGCAAGTCCGACTAGTTTAGGCGCCGCCTT	CCTATTCTGGTTACAGGAGTGCGGG	AAATCAATTGAATAGACAGAGAAGCCCGGTAAGCCTATCGATTCAAGCAAGTCCGACTAGTTTAGGCGCCGCCTTCCAGACTTCTAAAAGCGGGTGGTTTTAAGTCCAGAGCCCTATTCTGGTTACAGGAGTGCGGGTAGCCGACAAGTAGGTTAGCAAACTGGTGAATCAATAGGCTTTGCTCCTGCTTTCACAACCCTCATAAACCATGTAGCCAACGTGGGTAGAAAGGGTCATACTTTTTAGATGATTC
	novel_mir13	+	AGAATCGTACTACCGCTGTCGATGCCGG	ATGGTCGACCTGGTGTTAAGATTTTATT	AGAATAGAATCGTACTACCGCTGTCGATGCCGGTGCTGCTTGCCGACGGCCCTTCATTTACTTCTGGAGTCAACGATGCCGCTTTTTCCGTCACGGAAATATGTCTTTTTTTTTTAGACTGGCTAAAAAGGAAAGTAAGTCATATAAACTGAGACGGAGGGAGTAAATGAAAGGCTAATGGAAGGTAGTAGAATAAGCATGGTCGACCTGGTGTTAAGATTTTATTCA
	novel_mir14	+	TGAAGCTTCACTGTTCCCTGGGATTGGCTT	GACAGTCTCAGGTAGACAGTTTCTATGG	AAAGACCCTATGAAGCTTCACTGTTCCCTGGGATTGGCTTTGGGGATTTCCTGCACAGCTTAGGTGGAAGGTGAACAAGGCATCCTTCCGGGGTGGGGATGGGGGGGAGCCATCAGTGAGATACCACTCTGGAAGGGCTAGAATTCTAACCTTGTGTCAGGACCTACAGACCAAGGGACAGTCTCAGGTAGACAGTTTCTATGGGGCTTA
	novel_mir15	-	GGAGAAAAGAAGAAGAAATTTAGGTAT	AAATTTGGTATATTTATTTTTTATTTCTTC	GGATATAAATAATTTTTCTTGTTAAAAAATTAACACCAGCCTCCTTGTTCATAGTGGTTGAGGAGTTTGGTCCATACCACTAGTAGGTCAAGGGTTCAAAGGCTGGTAAGGAGAAGGAGAAAAGAAGAAGAAATTTAGGTATTCTAAAATACCTTTTTAGATATTAAATTTGGTATATTTATTTTTTATTTCTTCTCTTGTGAATATTTATATTT
	novel_mir16	-	GTTAAGGTATTCTAGAATACCTT	TTATTTTCTCTCTTTGATTACA	ATTTTACTTGTTAAATTAACACCGGCCTTCTTGGTCTAAGTGGTTAACTAGTTGAGGAGTTTACTCCTAACCACTAGGTCAAGGGTTCAAAGCTGGTAAACAACAAAAAATAAACAAGTTAAGGTATTCTAGAATACCTTTTTAATTTTTGTTAAAAAATTATTTTCTCTCTTTGATTACATATGACTATTTTTTGTTTTTTATTGTAGAAA
	novel_mir17	-	CTGCTTTCGGTGGAAGCGGCGTCTT	GCCTGCTTCTTTGACGAAGTGACT	TGGGGCCTGCTTCTTTGACGAAGTGACTTAGTGGGAATCTTCTTTTGATAAAGGAGGTTCTTCTGAGATAATGGGGACATCTTTTTCAAAGGTGTTTTGTCTTGTAGCTTCTCATTGGATGCCAATTTGGAATAGTGAAATGCCACTTGTGGAAAAGTAATTCTGGCTTTGCCTCTACTTTTCCAACTGGGTCATTTTCCTATTTGTAATCGAGGTCCATGTAAGCCAAAGCCAATCCTTTGGGATTACACACGTCACCGTTATCTTCACTGCTGCTTTCGGTGGAAGCGGCGTCTTC
	novel_mir18	+	TCCTCTGCCTCCAAAGCTTGTACCCTTTT	AGGGTACAAGCTTTGGAGGCAGAGGATGAT	TTCCATCAGCACCAAAAGCTTTAGTATTCAGTTGTAGAACATGATCATCCTCTGCCTCCAAAGCTTGTACCCTTTTTTTGGATCAGTATTGCATCCACAACACGATTTTTAGCAGCTTCTTTCTCCTGAATTGATACTCTACTTTCCAACTCTTTGAACTTTTCCAAATACAACTTCAGTTTTGCCTCAACTTTAGCTTTTCCATTTTTTAGCTGCTCATTTTTCTTCTGCATATCCTTCAATTAATTCTCCATCAATTGAAACATATGCAAAAGAAAAATAAGAACCTAAAAAATGAAGAAGCTGAAGTTCACGCAAAATTGAAGATGTATTTCAAAAAGTTCAAAACAGTTGGAAAGTACAGTATCAATTCAGGAAAAAGAAGCTGCTAAAAATCAT…
	novel_mir19	-	CACAAACTATTTAAGGTTTTCACTTTTT	AAGTGGAGACTTTGACCGTAGGGA	TGAAAAGTGGAGACTTTGACCGTAGGGATCAATTGATAGACATTTTTCTTGAGGAAGGAGGGTCATTACACAAACTATTTAAGGTTTTCACTTTTTT
	novel_mir20	+	AGGTAGGCTCAAGCTAAGATTCTGCTCGTG	CGTAATGTTATAAACCTGCCTAAT	ATGGAGGTGTGCAAAGGTAGGCTCAAGCTAAGATTCTGCTCGTGAGCGTAATGTTATAAACCTGCCTAATTGTGAAACCGACAGGTCAAACAGAGACGAAAGTCGGGTGCACACTTCTGA
	novel_mir21	+	AAACAAATGGTGAAGTCTCATGTGGGTGTT	CCAAAATGTACTTCCCATAG	CTGAGCTTGGTAACTCAAGCTTGTAACTCAAGTGAGGGCATTAAGGTGATGTGAACAAAACTAAAACAAATGGTGAAGTCTCATGTGGGTGTTATATGGACAAGCATAGATACTGGCTTGTTGTTTAGCAGTAGGAAGAGTTTGGTTTAGAAGATGCTCATGTGTAGCACATACCTCTTGCTGTCTTCACAGAGCAGCGGCACTTCCTCTTGCTCTCTCAAAGACCACGTTGCTAACAAGTCCAAAATCCAATCCAAAATGTACTTCCCATAGTTTGGACCATCACCTTTTTATACGTTTTTGGATGCTGCTACTCAACTCTAAACCCCAGTTCAT
	novel_mir22	+	AGAAACCTTCCAGACTATGCCATCCTAAT	GCGCTGTTAGGAAGAAAGTATCTT	TTAATTCCTGAATATCATAACATGATAGAATAAATCTATATTAGTTGTTATTTACTAGAATTATTGTTAGTATGTTTTCTAGTTTGCTAACATGAGGAAAAAAGAGAAACCTTCCAGACTATGCCATCCTAATGTTGAAACCATAGGCAGGAAAGCCGTGAGGGAAGTAAACACAGTTGAGGCGCTGTTAGGAAGAAAGTATCTTTGAAAGTACGATGTTAGTAGTGACAGGGAAACATATTAAAAATAATCTAGTTTATAGGAATCTAATATGGTGGAATTCATCAAGGTTATGATATGAAGGAATTGT
	novel_mir23	+	GTTTTCTAGTTTGTTAACATGAG	TACGATGTTAACAGTGACAGGAAAACATG	TTAATTCCTGAATATCATAGAATTGATAGAATAAGTTTATATTAGTTATTATATACTAGAATTATTATCAGATGTTTTCTAGTTTGTTAACATGAGGAAAAAGAGGAAATCTTCTAGACTATGCCATCCTGAAGTTGAAACCATAGGCATGAGAAGCCGTGAGGGGAGTAAACGTAGTTGAGGCACTGTTAGGAAGAGAGTACCTTTGAAAGTACGATGTTAACAGTGACAGGAAAACATGATGAAAATAATCTAGTTTATAGTAATCTAATATGAATAATATTCGTCAGGACTATGATATAAGGGAATTGT
	novel_mir24	-	GTACCAAGGGCTTGGGGTGGTAGGG	TGTCATGTCAGCGACTTGAGTGTA	AATTTTGATACTTGCACTAGGCTACTCTCCCAGCTCAAGGTAATCACATCAAATCGTCATCTATCATTGTTCAAACTCGTTTAAACTCAAAGGCGGGAGGGGTGGATTGGGTGTGAGGAAGATGAAGGGGCAGGAGGTGGGGGAGGTTGGTGGTACCAAGGGCTTGGGGTGGTAGGGAATGAAGAAGATGAGAAAAAGAAAGATTATTGGATAAAAAGAGAATAATTGGGGCCCACTTATTCTTTTTCTCTTTAATTTTCTGTGTATACGCGCTTTATTTTTTTTTGACTTGTCATGTCAGCGACTTGAGTGTATTAAGATA
	novel_mir25	+	TTGCTGCCGACTCATTCATCCAA	AGTGAATGAAGCGGGAGTACAAG	AGAGCTTTCTTCGGTCCACACATGGGGGGCGATAGGGTTCAATTTGCTGCCGACTCATTCATCCAAATGTTGAGGTCTTGATAGTCGAATGCCACCTCAGCAACTGAGTGAATGAAGCGGGAGTACAAGTTGAGTCTTGAGCTTCCTGTACTTGGACTGAAGGGAGCTCC
	novel_mir26	-	TTGTGGTGAATTCACGGGTTCCAAGTGAAG	ATTGGAACTTGCTTTCACGAAAGAGAT	GTATGACAAGCAAAACAAAGCACGGGCTACCATAGGAAGATTGCCTGAAAGAACAACTTCTATGAATGATTGGGATTTGTCTTTTAGAGCTTGTGGTGATAGGCTAATTGCCTTTTAAAGCTTGTGGTGAATTCACGGGTTCCAAGTGAAGGACCGCCTCATTGGAACTTGCTTTCACGAAAGAGATCTGGTTGCTTTGTGTATAATTGTGTTGTCATGG
	novel_mir27	-	TATTTGTTCACTATACTAAAAA	TTTTAGTGTAGTGGACAAGTAAAGGT	ATTTTTAGTGTAGTGGACAAGTAAAGGTGGATGGAAGAAGTACTTCCTCCGTCCACTTTTATTTGTTCACTATACTAAAAAT
	novel_mir28	+	CACTGCACGGGTCGATACGCAC	GTCAGTGTCGGCCCAGCAGAGT	CGGGATACTTAACGCGTTAGCTACAGCACTGCACGGGTCGATACGCACAGCGCCTAGTATCCATCGTTTACGGCTAGGACTACTGGGGTATCTAATCCCATTCGCTCCCCTAGCTTTCGTCTCTCAGTGTCAGTGTCGGCCCAGCAGAGTGCTTTCGCCGTTGGTGTTCTT
	novel_mir29	+	TCCAAAGCTTGTACCCTTTTTTGGATCAGT	TCCAAAAAAGGGTACAAGCTTTGGAGGCA	TTCCATCAGCACCAAAAGCTTTAGTATTCAGTTGTAGAACATGATCATCCTCTGCCTCCAAAGCTTGTACCCTTTTTTGGATCAGTATTGCATCCACAACACAATTTTTAGCATCTTCTTTCTCCTGAATTGATACTCTACTTTCCAACTCTTTGAACTTTTCCAAATACAACTTCAGTTTTGCCTCAACTTTAGCTTTTTCATTTTTTAGCTACTCATTTTTCTTCTGCATATCCTTCAATCAATTCTCCATCGATTGAAACATATGCAAAAGAAAAATGAGAACCTAAAAAATGAAGAAGCTCAAGTTCACGCAAAACTCAAGATGTATTTCGAAAAGTTCAAAACAGTTGGAAAGTACAGTATCAATTCAGGAGAAAGAAGCTGCTAAAAATCGTG…
	novel_mir30	-	TTAGGCATCTGGTTGTGCTAAAT	TGGTGATCAAGGGACTGCCCATTTTAATTG	TTCCCAGAATTTGGTGATCAAGGGACTGCCCATTTTAATTGTTGTGGCTGATTTGCTATGTTTTAGGCATCTGGTTGTGCTAAATTTTGGGGT
	novel_mir31	+	TTTGGCTTACTTTCGAATTCGTTGTTGGAG	CGATCTGTCAAAGCTGGCTAAACG	CATCTTAAAGCAAGTATGATATATGTCTATAATATTTGGCTTACTTTCGAATTCGTTGTTGGAGAAAGCGATCTGTCAAAGCTGGCTAAACGTATGTTCTAGCTTCAAGATT
	novel_mir32	+	ATTAACTTTGGCCAGCATC	GCGCTTGCCTTCACCGATTCA	TGGGATGAGTGACATGCTTCTCGAGATAGTCAGGAGAATTTAGTATGAGTTTTTTCATTTCGGAAGCCCTTAAGTTGGAAGAATTAACTTTGGCCAGCATCCAGAAGAATTCCTTTGCCTCGAGGTCAGCGCTTGCCTTCACCGATTCAAAATCCTAGGGTTTCCACTGCCTAACTAGACTTCTCATTCATTCCC
	novel_mir33	+	GTAGGCCTATGGCACATTTCCATGAAGGTT	CTAAATCGCTAGGCCTATGGC	TGGAATCGGTAGGCCTATGGCACATTTCCATGAAGGTTAATGATGAGACCTAAATCGCTAGGCCTATGGCATCTT
	novel_mir34	-	AACGTTCTGTCAATTGGGGAAGTT	TTTTTCAAGTGTCAGTAGCGGAA	AAGTTTTCTTCACTTTTGAATAATCATATAGAAAGCGTAATAGCTCACTGGTCTAGCTTCATGGCACCGAAAATGTATCAGGGCTCAAGTGATTCACCGAAGCGACGAGACCTTGAAAGCTGCTTTTTCAAGTGTCAGTAGCGGAACGTTCTGTCAATTGGGGAAGTTTTTTGGTGACAAGACCTGGAGATATCAGAAGTGAGAAAGCTG
	novel_mir35	+	ACAGTAACGAAGTAGCCAAGAGACTGA	AGGTCGTTAGGGCGAAACACTGTTCATG	ATTATGTTGTGAGTATTGTAAGTAAATATGGTGTGTATGTAAAAATTATAATATGAAATAAACAGTTTGTTTTATACCTCTCTTCTTAAAACTCCATTTATAGTCATAAGTGAAGGTTGCGATCTTCAGCTTTAAGGAGGAACAGTAACGAAGTAGCCAAGAGACTGAGGTCGTTAGGGCGAAACACTGTTCATGGCCTGAAGGGAGAACTACTGCGGTAGTGATAAAGACTATTCATCGACATAAGAGAAGGAAGGTATACACGCGAACTTTTATTACATATTATGAATTCTTACTAACATACTATATATGCTTATATTTTACTTAGACATAAG
	novel_mir36	+	CGCCCCTGGATGGCGGAGTTCCTC	GAACTCCGCCAAGGCCGCTTT	CTTATTGAAAGCCATACCAGAACCCTGACCTGCGAAAACGAAGATCAGAGTACTGATGAACTCCGCCAAGGCCGCTTTAAGCGCCCCTGGATGGCGGAGTTCCTCATGGCTTCCAATAGT
	novel_mir37	+	TGACTAATCTGGATTCGTGCTGTTTAGAGT	CAATTAGCCTACAAAGATTAAAAAAAAT	ATTGAACTTTTGTGGCTCTTGACATTTTATTGTACTTGTAGATTGCTAGATTTGGAAGATTGTATGTTCTTGTGTTTTTTCTGTGCTGGTTGTTTGACTAATCTGGATTCGTGCTGTTTAGAGTAGACAAAAGAGTTGAGAGTCTCTTGACAATGATCATCATGTTCATTTAATTTCAATTATTTTCTTTGTCCAATTAGCCTACAAAGATTAAAAAAAATTTCCAAGAAAAAAAAGAAGTGCAATTTTTGAGAGACATGTTGAGGGAATCATATACACCTGCTTGAGTTAGGTGAGTGTCTTCCCTTACCATAAGGCAATCAAAGTGAGATTGCCAGGTAGGTTCAAA
	novel_mir38	-	AATAATAAATATAGGTTTTTCATAAGA	AGGGGCCATATTTATTTGA	GGCGAATCTAGAATTTCAAGAGGACGGGTGCATCATTGTCAAGGGCAGCTCTGTCCCTTTAAGAAAAAAGGCAACTAATTTAGGCTTTCAAATTTGAGGGGCCATATTTATTTGAGCAATAATAAATATAGGTTTTTCATAAGAAAAATATTAAATACATTTGCA
	novel_mir39	-	GGTATCAGAGCCATGGTTCAATGATGAAAC	CCGCATTGCACCTAATTATTTTGATCCTAA	AGTGGATTGCTCATCTCTTTTGTGGACGTAGGCCGATTGACTGAACCACGTTAAATATTTGTGTCTTTTGGTGTGTTTCTCGTTTGTCTTCTTACTCATGGTCTTTCGAGGTTTTCTTTGTTAGCTTCCGCATTGCACCTAATTATTTTGATCCTAACAAGTGGTATCAGAGCCATGGTTCAATGATGAAACTATGTGAGAGATGGGTGTTCATC
	novel_mir40	+	ACTTCCAGACTATGCCATCCTAACGTT	AAAGTTGAGGCGCTGTTAGGAAGAAA	TTAATTCCTGAATATCATAACATGATAGAATAAATTTATATTAGTTGTTATTTACTAGAATTATTGTTAGTATGTTTTCTAGTTTGCTAACATGAGGAAAAAAGAGAAAACTTCCAGACTATGCCATCCTAACGTTGAAACCATAGGCAGAGAAGCCGTAAGGGGAGTAAACAAAGTTGAGGCGCTGTTAGGAAGAAAGTATCTTTGAAAGTACGATGTTAGTAGTGACAGGGAAACATAGTAAAAATAATCTAGTTCATAACAATCTGATATAGGTGAAATTCGTCAAGGTTATGATATGAGGGAATTGT
	novel_mir41	+	TGGGCTGTGACAATTCGTTGGGTG	CCATTCCACTCTTCCATACCCCATTT	CAATTTGGGCTGTGACAATTCGTTGGGTGTGTTAAATCAAGGTGGGAATGGGATGATGAATACAATTTATTATAATTATAATTTAATCCCATTTCTTCATAAAACTTGATCACATTAACATTCCAATCTAGAACCACCCATTCCACTCTTCCATACCCCATTTTC
	novel_mir42	-	GCTAATGTTCCATCTAATTCA	AGAAAAAAGGGAGGTTAGTGGAA	AGAAGAAAAAAGGGAGGTTAGTGGAAGTGGACGTTACCTCGTTTTTCATCTGTCTGTTTTTTCTGACACACCTTTGATCTTTGATGATGGATACGTCGCTCCGTTCATATTTAGGTGATACTATATTAATTTCAAGAGTTAAATAATGATAAATCACCTAAGACCGCTAATGTTCCATCTAATTCA
	novel_mir43	+	TTAAAAAAAAATTGCTGACAGGGAGCCTGA	GGCTGCCCTTTCAGCAATTTTTGTTAAAAA	GAAAGAACAATTATTTTAAAAAAAAATTGCTGACAGGGAGCCTGATTCCACCCAAAAATTTGGACTCGATGTAGAAATCATCAAAATGAGGGACGAACTTTAATCGGTGTCGAATTAGGCTGCCCTTTCAGCAATTTTTGTTAAAAAAATTATTTTTTA
	novel_mir44	-	TGAAGGATCCGACACGAGTGTGGCAACATT	GTTGACAGGTATGTGTCGGATTCTTAAAA	CAAATTCTTTAACAATGTTGACAGGTATGTGTCGGATTCTTAAAAAGTGTATTTTTGAAGGATCCGACACGAGTGTGGCAACATTTTTGAAGAGTTTA
	novel_mir45	-	TCATGTAAGACGCGAGTGCCTACTTGT	AGTAGACACACACGTCTTACATGACAA	TGCATAATACATAAACGTGCCCATTAACTTGGATTCAGTTGACATCCATGCCCTCCAACTTTGAGTGTACACTTAAACTTGTATATAGTTGAACAAGTAGACACACACGTCTTACATGACAATTCGCGTGAGATACACTCGAATTGATTCGTATTATGTCATGTAAGACGCGAGTGCCTACTTGTTCAATTTTATATAAGTTTATGTGCCTACTTGTGCACATCCAAAGTTGGAGGGAATAGATTCCAATTGAGACCAAGTTAAAGGGCATGTTTATGTATTATGCC
	novel_mir46	+	ACGGTATTTCAGCCTTAATCGACCT	TCTTGCGGCTTACTTCCTTACTGTTCCTC	AGTTTGCTCTTTAAAATAATAATATGAAATAAGAAGTTGTGCGTTTATACCTTCCTTCTTTTGTTCGATGAATAGTCCCTTATCACTACCTCAGTAGTTCTCCTCTAGGCAATGAACGGTATTTCAGCCTTAATCGACCTTAGTCTTGCGGCTTACTTCCTTACTGTTCCTCCTTAAGGCAGAAGATCGCAATCTTCGTTTGAAGACTATTTATGGAGTAAGAAGATAGGTATAAAAACCAAACTTTATTTCATATGATTATTTTACAGACAAACC
	novel_mir47	+	ATTCTTCCTCCATGTCCGGCTAGCAGTGA	GATAAGGAAAGTGAGGGTGATGAGAATGGT	TATGCAGCGCTTCAGGCCTAACTAACTTTTCTTTTGGAATCAGGAAATATTCTTCCTCCATGTCCGGCTAGCAGTGATGGATCTGATCAGAAGGGTGATGAGAATGATAAGTCTGATAAGGAAAGTGAGGGTGATGAGAATGGTAAGTCTGATAAGGAGAGTGAGGGTGATGAGAATGGTAGTTGTATC
	novel_mir48	-	GCCTTTTTCTTGACAGTAGGATTTGGGAAG	TCCTGCCAAGAAGCCAGTTAA	CTAAGTCAACGCCTATTTGTTGTGGATCTACTGGCCCGGACGCTTGAATCTATTCCACCATCCAATCAAGAAAGAATCACTTCGAGTTCAGGTGCGGTACTGCGGCCGGACCGGAAAGGAGGGGGATAGCGAACCTCCTGCCAAGAAGCCAGTTAAATAAGTGCTCTTAGCCTTTTTCTTGACAGTAGGATTTGGGAAGCTCTTCCCTTCTGCTTGACTTGT
	novel_mir49	+	TTCGATCACTTGGCCCGACGTCTTGT	GACGTTGGGGCATGTGATTGAAC	ACAACTGATGTCAAGTTCGATCACTTGGCCCGACGTCTTGTCACATTTAACTCCATCCCATAAGCAGTAATCTCTGATCATATTCCATGAAAGTGTTTTTGGATAAGATTTTTTACCATAGTAATCACAAATACTAGATGACCGTGCTCTTTTGGACAATAATTTCTGATCAAAGCATTTCCCTTCTAAAATTCAAGAGAATGCTTACGGTAGGTCCCTCATCGAGTGTTTGTGATTACTACAGTCAGGAATCTTATCCAAAGACAAGTCATGGAATATGAGCCGAGATTGGTGTCTATGGGATGGAGTGAATGTAATAAGACGTTGGGGCATGTGATTGAACGTGACCTCAGTTGC
	novel_mir50	+	AAACTTCGGAGGGAACCAGCT	CGCTGCGGGCCTCCACCAGAGTTTC	CAGCTATCCTGAGGGAAACTTCGGAGGGAACCAGCTACTAGACGGTTCGATTAGTCTTTCACCCCCTATACCCAAGTCAGACGAACGATTTGCACGTCAGTATCGCTGCGGGCCTCCACCAGAGTTTCCTATGGCTTCAACCCGCTCAGGCATAGTTC
	novel_mir51	-	TACCAACACCCTTTGTGGGATCTA	TACTCATCGGGGCTTGGCGC	CCGCGCCCTACTACTCATCGGGGCTTGGCGCTTTCCCCGACAATCGGGTGTAGGTCACGCGCTTAAGCGCCATCCATTTTCGGGGCTAGCTGATTCGGCAGGTGAGTTGTTACACACTCCTTAGTGGATTTCGATTTCCATGACCACTGTCCTGCTGTCTTAATCTACCAACACCCTTTGTGGGATCTAGGTTAGCGCGC
	novel_mir52	-	ATGGCGGATTTTAGATCAGTAGAGACTTCT	AGTCTCTACTGATCTAAAATCTGCCATTGA	TGAAGAAGTCTCTACTGATCTAAAATCTGCCATTGAAGAAGTTTCTACTGATCAGTGGAAACTTCTCCTTTCTCCTGAGAAACTTCTTCAATGGCGGATTTTAGATCAGTAGAGACTTCTTCT
	novel_mir53	-	GGGAGGGAGTCGACTGAACATCTCAG	GGAATTTCGCCCCTACTCCCAAG	TTGAAGATAAGATGCAAAGGGGGAGGGAGTCGACTGAACATCTCAGCCATTGGCGGGAATTTCGCCCCTACTCCCAAGAAGTTGCTGGTCGGGATCGTGGAACTGTCGCTCGAGAAGTAAGAAGCTGATCCTTGTTTGGTCATAAGGATCTTAGCTCTTTTCACGAATCCGCAGCAAGAAGACGCAGATATTTTCAT
	novel_mir54	-	AGCCTGTTTGACCAAGTTTTTGGGAGAC	TCCCAAAAGCTTGGTCAAACATGCTATA	TTTGGATTCCCAAAAGCTTGGTCAAACATGCTATAAGTTATACATGATTCCAATTACAACCAAACAGTGGATTCAAATAATCATGTATATAATTTGTTATAACTTTAGTTTTACAAAAAAATATAATTTGGTATAACTTTATCCGATGTTTGGTTGTAATAACTTATAGCCTGTTTGACCAAGTTTTTGGGAGACCAAC
	novel_mir55	-	CAATCCCATACATTCAATGTTTGCAGTTTG	GTATATGTAGCGTTTGGAGATTCAG	CCGAAGCTTCAGCTCTTGCAATCGGGGAAATAAGGTCATGATTCCTTCTCCTTTTGTGATCACTTCTTCCATTGATTCACAACCAAGTATATGTAGCGTTTGGAGATTCAGAAGACCTTTGGCCACTGATGGAGACATCAAGTTTCTCAATTTTCCACAATCCCATACATTCAATGTTTGCAGTTTGGTGAAGTAGTCAGTTGGAAGTTGGTGAGAGCATAGAGCACTTATATTGTTAGGCCCCTGGATAGATAGAAGTTCTAGGTTGGGACAAGAAACCTGCGAGCTTTGA
	novel_mir56	-	ACCTTTTGAGTAGTATTTTTCCGACATAAT	AAGTTATAAAAATTTACTTTTTGCC	TGAGTATAAGGGATTATTAATTATATTATGAATAGTTTATCAACAAAGTGGCTGTAGTTTAGTGGTGAGAATTCCACGTTGTGGCCGTGGAGACCTGGGCTCGAATCCCAGCAGCCACACTAAACACTTTTTTTGAACTTATTTACTTCGTTTCATTTTACGTGGCACCTTTTGAGTAGTATTTTTCCGACATAATCAACATTAAAATTTGCATGAATATTAATATCTCTTAAGTTATAAAAATTTACTTTTTGCCGCGTTAAAATTAATTTTTGTTCACTTAAGCTCC
	novel_mir57	+	AGAACTTGTCTCGCGATCTAGCTCCGTTAT	ATGGATCTAGGAGACACAA	TCCCTTTTACAAGAACTTGTCTCGCGATCTAGCTCCGTTATACGATAGGCTAAAATATATCTATGCCGGATAACTAACTTTAATTTATATCTACCATGAAAGATCTAGACTTTATTTAAATATGCATAAATTCATCATGGTAAGTATTTAATAAAAGTAAAGTATTTCGGCATAGATATATTTCTCTCTTTTGATCATGGATCTAGGAGACACAAGTACTAAAAGTACTCGTTTAGAAGAGGT
	novel_mir58	+	TGCGGTATAAACAGGGGATTTGT	TTCTGTAAAATCCACTTCTGGAACCCATTT	ACTTTGTTTGCGGATCCTTTTTCATTAACTTATCCCAGAAGTTATTGTAATAAGTGCGGTATAAACAGGGGATTTGTTCTTCTGTAAAATCCACTTCTGGAACCCATTTGTGGATCCATGGAACAGAGA
	novel_mir59	+	CCTTCATAGGAGATACTCGGAGAAATACCC	TATTTCTCCGATTATCGCCTATGAAGGGCG	TTCCTAAAGACATCATGTAGCCTCCTGAAGATAAGTTACGAACGTCTCCACAAGACTCTACTAGACATTAGCATTGTACAAGTGAGACCGGTGAACCTGGAGCTAAGCTTGCCCCGCCTCCCGAATCTCATCACGCCCTTCATAGGAGATACTCGGAGAAATACCCGGTCGCCAACTACAAACCTCAACGGCCGATCGGGTATTTCTCCGATTATCGCCTATGAAGGGCGTGATGAGATTCGGGAGGCGGGGCAAGCTTAGCTCCAGGTTCACCGGTCTCACTTGTACAATGCTAATGTCTAGTAGAGTCTTGTGGAGACGTTCGTAACTTATCTTCAGGAGGCTACATGATGTCTTTAGGAAA
	novel_mir60	-	TCGGAATATGGAAGTTGCTGAA	TTGATGACATATGGACCGAACA	GAGGAGGTATTTGGTAGTCATTGATGACATATGGACCGAACAAGCTTGGGATGATATTAAGCTATGTTTCCCAGATTGTAACTGTGGAAGCAGAATACTGCTGACCACTCGGAATATGGAAGTTGCTGAATATGCTAGCTCAGGTAAGCCTCCTA
	novel_mir61	+	TAGCATATTTAGCCACATCCAT	CATATTTCGAGTTGTCATGAGTATTCGGCT	AATGCAATTTGTTTCCCAATTTCTTTAAATTCATGAGAAACACATGATTCTTTATCAAAGACCTTTGTGTGCAGTAAATTCCAACTTCTTTTAAAATCCAAAAGGCTCATTTGATAAGGAGTAGTGTTACCTGAGCTAGCATATTTAGCCACATCCATATTTCGAGTTGTCATGAGTATTCGGCTTCCATTGTTACAATCTGGGAAACATAATTGTATA
	novel_mir62	+	GTTTCCTTTGCATATCCATGGAGT	ACTATGTCTTCAAGGTGGAGGGTT	ATGAGTCGGTCTCCTCCCGCCATGAGTTTCCTTTGCATATCCATGGAGTACAACTACTACTATGTCTTCAAGGTGGAGGGTTTGTGGAGGTGTTGATTGGGTCAA
	novel_mir63	-	ATGAACGTTAGTCCCAACAAG	TGGGACTAACGTTCATTGGATTGT	TCATACATGTATGTTTTTGTGAATAGATAAATACATTCAGTTTGTATTTTGTGGCTTTTTCAAGTCCATTTGTGAAAATGAAAGAACAATAGAGTTCTGTGTGGGTTGTTCAGCAACTTGTTTTTTCTCATGTTCTTGTTGGGACTAACGTTCATTGGATTGTGAAACTACTTTCAAGGCGTCCTCCATGTTATTCACTGAAAACACATATGTGGTGTCATCATGAGAAAGCTTCCGAGAACTCCAATGAACGTTAGTCCCAACAAGAACATGAGAAAAACAAGTTGCTGAACAACCCACGCAACACTCTGTTGTTCTTCATTTTCACAAATGGACCTGAAAAAGCCACAAAATACAAACTAAATGTATTTATCTACTCACAAAAGCATACATGTATGT
	novel_mir64	+	TTACAAGCACGAACGACTCGATAATGGATT	ATTATCGAGTCGTTCGTGCTTGTAAGGA	CTTCAACTTTTGCATGTCGTTGTCTTCTTCGCCGGATAGTTGGCGCAGGAAGAGTATAATCATGACTGTAAAGATGAAGGAGCGTTGGTAAATGACGATGAGGTACGCATGATTATTCCATCGGCGCCTGTAATGACACCTAAGGAAGAACGGGGGCTGGTTTCTGCACCTCCATTCTATCCTTACAAGCACGAACGACTCGATAATGGATTTGTATACCTTATCAAGCAATTGGATGGACAAAAGGAAAAAGATGAAGCGATAAAGTTGAAGCTGATTGTCAAAGCAGGGTATGCAATTTTTTGTTAATGTTTTTTGTGACTAGCTCTAGCTCTGAACTGATTAAGTGATTTTCAACAAAATTATTTTAGGTTTTTGCGAGACCGATGCTTATGAAAT…
	novel_mir65	+	CCACATGTTCATATATCTTCA	CAACTTCGGATTTGAGAATGGGATA	AGGCACTTTCTGTTTTCTGGTTGCACACAATGTAGAGAAGGAAAGAGGTAACATCAGCTAAATGATAATTGATATCTTCAGAGCAGGACGAATGGTTAGCATGCACATTCTGCTAAGTAGAAAGACAAAACCCATTGGCTAAAGAATTGATGTTTACCTTTTCTTTCAACCTTTCGAGGTCCTGAGCTAAAGTATTAAACAATGTGCAAGGAATATCCACATGTTCATATATCTTCAACTTCGGATTTGAGAATGGGATATACTCTGCCAGAACAGACTCACTGCTA
	novel_mir66	-	ACTATTGGTTGAGTGAGCATCTAAGAA	TCTCGGGTGCTTACTCAACTAATAGTT	AGTTGATTTCTCGGGTGCTTACTCAACTAATAGTTATTGTTTAAGAAAATCAATAATATTGGAAGCAAGGAGAATGGTGACTTTCAGGATGATAACTATTGGTTGAGTGAGCATCTAAGAAATCGACG
	novel_mir67	+	CGACTTTGACTTTGACTTGAA	AATTCAAGGACAAAGTCGC	CCGACTTTGACTTTGACTTGAAAGAGTAAGTTTTCGCCTCTGTTGTTGAAAAGTCAGGACCCGTTGTGGAATCTATTCTAGACCCGCCTGCCGGCCCTAAATCTATCTTACTCTTCCTTGGTCTCTTCCACGGATCGGTGGATATGAAATAGAATGAATTCAAGGACAAAGTCGC
	novel_mir68	+	CCTATCCAAGCACAGAGTTGG	GCTCTGTGCAGTGGAAGGATA	ATATTGGGCTTTACCAGATGGTTGGGTTTGGTGGGCTTATTCCTGGCCTGCCCTATCCAAGCACAGAGTTGGATCACGAGGCCCAAACGAAAGTATGGGCTTCTTGATTCCTAAAGTGGGGTGGATCGCATGAGGCTGGCTTCACAGAGCAGTGAACAGCTCCCGCTCTGTGCAGTGGAAGGATAACGGGTCTGTGTCTACCAAGTTCAGTAAAGCTTGATGG
	novel_mir69	+	GTAGCTTGGCCTTTTTCGATTTCCTA	TGAAAAGGGTACTGTTCGT	CTTGAGCTTATTTACTGTTGAAAAGGGTACTGTTCGTAGCTTGGCCTTTTTCGATTTCCTATTTAGCGCTTTGAATTCTTCTGCTGTTCCTGCCTAGCGTTGAGGCCATAGGGCTTCCTTGTAAATAAGTTCGAA
	novel_mir70	-	CTCACACACTAGAGGTCCCCGGTTCGAAC	GTGTAGTCGGTTATCACGCTAGTCTC	ACATAAGAAGAAAATTGTCATCAAAGTCTGGGTGGTGTAGTCGGTTATCACGCTAGTCTCACACACTAGAGGTCCCCGGTTCGAACCCGGGCTCAGACATTTCTTTTTCTGC
	novel_mir71	+	CACGCAGGCCGAAGATCTCACTTGTCCTGG	CAAGTACGTAGAGATCTTCGT	CCATGGTGGTAGATGGGTCTAGAGAACCGAACTGTCTCACGATTTCAATCCGGTTAGAAAAACTGGCACGCAGGCCGAAGATCTCACTTGTCCTGGACAAGTACGTAGAGATCTTCGTGGGACCGTGGAGGGAGTCTCAATCGATCTTTTCTAGGATTCCTTATCACGCCACACATGA
	novel_mir72	+	CTTGACGATTATGTGTGGCCGAGCCAACAT	ATGGTGAGGCAAATTCAGGAGTTGG	TGTGATGGGAATTTGCTCAAGGCATTAAAATCAGGTGATGGTGAGGCAAATTCAGGAGTTGGGATGTCATGGAAGTGAACTTTGGCTATGTCTGAAGGATTTAAGGAGTTGGCTCGAATCCTAGCTTGACGATTATGTGTGGCCGAGCCAACATAGTAGACAGGAAGACCATAGGAGGAGATTAAACATGAAAGTTGGAGAAGTTGGTTAAGATGGCCTTGAGCTGGAAATGGAACCATAACTATAGCTACTTCATCTTGTTTTAGTTTGCTAAATTCATGGTTTAGTAAATTCTCATCGCT
	novel_mir73	-	GTTAGAACTGCTAGACACATGGGCTCACTA	TGACTCCGTCTAGCCAACCGT	CTTAGTGACTCCGTCTAGCCAACCGTGGTCTCAACCCGATAAGGAGTAAAAGGGCGCCTAATACCCGGTTAGAACTGCTAGACACATGGGCTCACTAAC
	novel_mir74	-	CCACCCTTCACCAATTGTAGCTCCGC	CTGTAGCTCAGTTGGTTAGAGCGTTGGTCT	AATATAATGGTCCTGTAGCTCAGTTGGTTAGAGCGTTGGTCTTATGAGCCGAAGGTCGCGGGTTCGAGCCCCGCCAGGACCAATTCAATTTATAGGAAAATGAGTTCAATCATATATATTATTAAGTGTTTTTTCTTTAACATTTTGACGTAAGGATCGTGTTCAACTAACCACCCTTCACCAATTGTAGCTCCGCCCTTGTGTC
	novel_mir75	+	GGATTCAGAATTTAAGCTTTATGAGTTC	TTAAAATTCTTAGCATTGAACCGAT	ATCGGGTGAAACAAGAATTTGGTAGGTCTAACACCATTATATTTTGTTATACATCTACTTTTACTCTCCATTATTAGAGACGGATTCAGAATTTAAGCTTTATGAGTTCAACCTTTAAAATTCTTAGCATTGAACCGATTGTATTACTAAAGTTGTTGTTTAGGCCTACTATTTGTTGTCACTTTAAGTGAACTCAACATATAAATTTATGTTTTGCCTCGAA
	novel_mir76	+	GGAACCGAGTCATTGTTGTGTGATAATTCC	ATTATCACACAACAATGACTCGGTTCCACA	AAATGTGGAACCGAGTCATTGTTGTGTGATAATTCCAGAAATTTGAGTACCAAACAGGGTTATGGGAGTGAGTGGCATTAAATTGCTGGAATTATCACACAACAATGACTCGGTTCCACATTG
	novel_mir77	-	TCTTTCCGATGCCTCCCATT	GTGGGAGGAATCGAAAGATATA	TATGGGTGAAGGAGAGGTTATTGGAGTGGGAGGAATCGAAAGATATAAGGATTTATTTATTTTTTCAATTTGATTGGAAAAATAGAAAAAAAAAGAATTATGTCTTTCCGATGCCTCCCATTCCCATGGCTTCCGTTCACTTCTCCCATT
	novel_mir78	-	AGCTGCACACGCTGGATCTACGAAAT	GTAGATCCAACGTGTGCATCTA	ATATTTGTTGCTTGTTCCCTAACTGCACTTACAAGATAGTTTTTGTCCTTTTGTGGGATACATAGAAGTCAAACTTGTTAGATAGGAATCAAAACATGTAAATTGATGTTTATGCTGTTTCTATTAGTATAGTATTTATCTACCAGGTGATGTTTTGATAAAAGCTTCATTTTGCAACGTGGTGGAGATACTCTTATCCTTGGCTTAAAGGATTTCGTAGATCCAACGTGTGCATCTACTGCTTTGAGTGCATTGCAAGGTGTATTTTCTCAATGATAATAATCCACTGTCCAACTTCCGTTAATGACTTATAAAGAAATTTTTCATGGTATTATAAAGAAGTTGGATTGTGGATTATTATCATTGAGAAAAAAATCACATTGCAATGCACTCAAAGCA…
	novel_mir79	-	TCCTATTCCACCCATGCCAATGGCTTCCA	GGAAGCTTTTGGAGTGGGTGGGATGGAAAA	GGGAAGCTTTTGGAGTGGGTGGGATGGAAAAATATCGTATTTATTTTTTTTCCTTAAAAGGCAAAAAAGATAAGAAATGAGATTTTTCCTATTCCACCCATGCCAATGGCTTCCA
	novel_mir80	-	TTGCCAATACCGCCCATTCCTATGGCT	GTGTTGGAGTGGGTGGTGTGGTAAGAT	TAGGAAATGGGAAGGGGATGAGTGTTTCGGGGAGGTGTTGGAGTGGGTGGTGTGGTAAGATTTCATATTTATTTTCCATAAAAATTGAGATCTTGCCAATACCGCCCATTCCTATGGCTTCCGATCATTTCTCTCTACCCTGTTTCTTT
	novel_mir81	+	TTGTTGCCGAGTCGAGGGGGCGTT	CAGCCACTTGACTGTAAGGAGAG	AAGCCTACCGGCCAGAAAGTCCTTAAGAACGAAAAAGCCAATTAAAAGGTTATTCCTTAACCGACTCTTGTTGCCGAGTCGAGGGGGCGTTCAGCCACTTGACTGTAAGGAGAGGGGGCTTGGCTGGTACCAGGCTC
	novel_mir82	+	ATTTACCAATCTAAACGCAAAGAGGATTAT	ATCCGCTTTGCGCTTAGATTGGTAAACGAA	GCATGTCATTTCAATTTATAGTTTCATTTACCAATCTAAACGCAAAGAGGATTATAAGACTCTTATAGATCACCATGGATTGCCATAATAATCCGCTTTGCGCTTAGATTGGTAAACGAAACTATAAATTGAAATGACATGG
	novel_mir83	+	TAACATTACTTGGTTCTCTTTGTTGTATA	ATAATTAAGGGGCGCTCAAGCTGGCTAGCT	TTGATAAGCGATTGCAATTACTACTGATCTCTTAGCTAGATTGTTTATTAATATAAACTAATAGGCTTTCAAAACAACTTTGATCAAGCGGTATTGAGTAACATTACTTGGTTCTCTTTGTTGTATAATAATTAAGGGGCGCTCAAGCTGGCTAGCTTACCGACCTCAAAATTGAATGAATACATATATATTATTATTAGTATGTAAGTAGTACATAAACCTAGAGTATGAGTATGATATGTTTGTTTATTAT
	novel_mir84	-	GTAGTGAGGCCAGTAATAGTAGTACTTTAG	AAATAAGTGTCTTGCTACTATGGCCAAA	AGTATACTAAAATAAGTGTCTTGCTACTATGGCCAAAAGAGTAGTGAGGCCAGTAATAGTAGTACTTTAGTATACA
	novel_mir85	-	GGATAACAGAGCTGCTACCATCACT	TGGTAGCAACTCTGTTATCTGAAA	AATCAAAGAATTTGTGGTGAATTCTAACAAACAACTATTTGAGGATATTTCTTTGTTGTTTGTTAAGAGTGATGGTAGCAACTCTGTTATCTGAAATGCCTTCCTGTTATATGGTTTCCAGCTTTTCGGATAACAGAGCTGCTACCATCACTCTTAGCAAACAACAAAGAAATATCCTCAAATAGTTGTTTGTTAGAATTCACCACAAATTCTTTGATT
	novel_mir86	-	ATCGTGCCAATCAAAGTTGCA	CTTTGATTGCCACGATGGTGT	TGCAACTTTGATTGCCACGATGGTGTTTGTTGTTGGCTTCACTGTGCCAGGCAGTAATAACGGTGATAATGGTATTCCAATATTGCTAAAATTAAATGGATTTATGGTCTTTGTCATTTCAGATGCAGGAACACCAGTACAAGCAGTATGGACATGTCAAAAGCCATAAATCCATTTAATTTTAGCAATATTGGAATACCATTATCATCGTTATTACCGCCTGGCACAGTGAAGCCAACAACAAACATCATCGTGCCAATCAAAGTTGCAA
	novel_mir87	+	GTTAAAGTTGAACCCCTTGGCCGCTGA	TTTGTTTTGAGGGGGTTCATTTTAATATA	AAGGGGGAATCAAACCCGAACCATCTCAGTTAAAGTTGAACCCCTTGGCCGCTGAGTCATGCTTCTCTTTTGTTTTGAGGGGGTTCATTTTAATATATGTACTCATAAAATCAGAAATAGACCTTATATATACAGTGTAATTTTTCGATGAGGGGGTTCGGGTTAACCCCCTG
	novel_mir88	+	ATCTAGTTGTAGCCGGTCTATTAATT	ACTAGTAGAGTGGCCACAACTAGATGT	GCAACTCAAACACATCTAGTTGTAGCCGGTCTATTAATTAGTGACAATCATTTTCGCAATTGGTTTCGCATCGCCAAGAGATATCGATTCCAATAAGCCCTAATAAAGGTATGGCGATTCTATTAAGTAGAATTGCCATATATCCCCTTTATTAATTCGGATCGATGTTAAAATTTCCTGGCAATGTGAAACCAGCTGCAAAGGTGATTAATGTAACTAGTAGAGTGGCCACAACTAGATGTGTTTTATATGTTGA
	novel_mir89	+	GAATGCCGACGACTATTTTCCAC	GAGAGGGAAGCCAGGCTTAGCGAGTTTTAT	ACTGGAGTAGAGTCGCTTATAGAATGCCGACGACTATTTTCCACTTAGTAAGTAAAGGGGAGAGGGAAGCCAGGCTTAGCGAGTTTTATAAGGCCGACCACTACATGAGC
	novel_mir90	-	ATCCCCAGTGAAGTCGTTTCTT	ACTTCATGGCCCAATGGATAAG	ACCATAAGTTGACTTCATGGCCCAATGGATAAGGCGCTGGTCTACGAAACCAGAGATTCTGGGTTCGATCCCCAGTGAAGTCGTTTCTTCTTTATGGA
	novel_mir91	+	TAGGAATGACTAGCATGATTATAGACTA	TGTGATTGCTTTATTCATATGG	CATTCCATAGGAATGACTAGCATGATTATAGACTAGTTCCATTTCTGTGATTGCTTTATTCATATGGAGTA
	novel_mir92	+	TTTTCAGTTAACTTCATTTTTATCAC	ATGAAATGTCCTAGCTTTACTCAAATGTTA	TGAGGGGGTTCGGGTGAACCCCTGGAACCCACGTGGGTCCGCCCCTGCTATCAACACATGTCTTGTGCTGACTTATCCCATAATTCATAATTTTCTCTTTTTATATGATGAAATGTCCTAGCTTTACTCAAATGTTAATTACGGTAATATTTTTTGATCTAAGGTCAAAAAATATGTATATCATTTTCAGTTAACTTCATTTTTATCACTTGTGCATGAACCTTCCTCT
	novel_mir93	+	CTAGCTAGGACAGAGCCATCCT	CTTTCTTCTGTTCTAGGTTTC	GATATAGGGAAGTGTGCCTGAGTCTTCTATAATAAGTAGTTGTGACTCGGTCTAGCTAGGACAGAGCCATCCTAAAGAGACTTTCTTCTGTTCTAGGTTTCCACAAAGCGGTATCAGGGTATGAGAACGCCTTTCTCCTATATA
	novel_mir94	-	GCTTGTTGAAAACTAGTGAGCTCGTAATG	TTACGGGTTCATTGATTTTCAACAGGCCTA	TATGGGAATGCGTCTTAGGTTAACCCCCGAGAGGTGATCTAACCTTATATTTATAGGCTTAAAAGCCTTAACCTAGTGTGCCTCCCCATTACGGGTTCATTGATTTTCAACAGGCCTACACTATTGCAAGCCTACACATATGACAGGAAATGGATACGGACCCATATGAAATCCACACAAATACACAACCTGTCTCTTGTCCAACAATCATTAACATTCAACCCATTTTACTTAACCGTAATAAGTTAATGTTAAGTCCACATTTAAAAATAATCCTAACATTCTCCCACTTGGACAACATTAACCTATTATTACATTTTAGTTAAGCGGGTTGAATGTTAGTAGTTGTTGGGCAAGACATACATCCATTTCATGTCATATGTGTGGGCTGTCAATAGT…
	novel_mir95	-	AAGGATAACGAGCCAGTGCTCTCCAAG	GGTTGGCATTAGTCTGGCCTGCCCTATCCA	CTGGACTTTGGTTGGCATTAGTCTGGCCTGCCCTATCCAAGCACGGAGTTGAGTCACGTGGTCCAGACGAAAGTATGGGCTGCTTGGCTCTTAGAGTGGGGTGGACTGCGTGAGGCTGGTTTCACAGAGCAACGAACAGCTCCTGCTCTGTGCAGTGGAAGGATAACGAGCCAGTGCTCTCCAAGTTCAA
	novel_mir96	-	GTTCCATAAGCATAGTCTCACCCTTT	GGGTTGAGTTATGTTCTCAAAGCGCCA	AAAGGGTTGAGTTATGTTCTCAAAGCGCCAATCATTACTGGAGAGTATATCTTTCCATTGTAAAGTTCGAGGAACAAAGATGGAGCTATGTTCATGGTTGGGTTCCATAAGCATAGTCTCACCCTTT
	novel_mir97	-	CGTAGAAAGCAGAACAACTCCAAGGGG	CTTTCTCTCTCTGCGTTTTTGTTA	ATTACTAGTCTTGGTGCTCCTCTTTCTCTCTCTGCGTTTTTGTTAACGTAGAAAGCAGAACAACTCCAAGGGGATTTATAAATCCTAATAATCTTATTTTTTAAAAGAGTGTCAATCTCCTTTTTAAAAAATTGCATTATTTCGTGATTCATCTGAATGGGCCTTGCCTTAGTGGTAATAGCCTGTTCATTAAATCCTTCCATGTATGGTAAA
	novel_mir98	-	GATTAGCACATCATCAAACACTTGACAT	TTGAGATGTTTGAAATGGGAATCAAT	AGGTTTATAAGTGCCCTGATAAAGTTCATGAGCTAAAACCTTGATGGTGGTTTGAAATAGTACCATTTTCTTGGCACTGACAACTAAACCATTATTCTTAATAATTTTGAAGAAAGTGTTGAGATGTTTGAAATGGGAATCAATGTTCTCTGAAAAGATTAGCACATCATCAAACACTTGACATATAAGAGTAATCATTGAATATAAAATTCATGATATTTTGGAATTCAGAAGGGGCATTCTTGAGCCC
	novel_mir99	-	GCGTTTAGACCTGTTGATGGTGGTCTTAT	GAGGTCACTGTAGCCAAGAGGGCGT	GGTCAGCCGTATTCTGTGAGGTCACTGTAGCCAAGAGGGCGTTTAGACCTGTTGATGGTGGTCTTATAGCTAAGATGACT
	novel_mir100	+	CCTGGCTCGGCTCCGATAACGCAATTCCG	AGTCGGTAGTTGGGCACTGGATC	GTCCAGTAACGACCATTCCTGGCTCGGCTCCGATAACGCAATTCCGGGAGGAGTCGGTAGTTGGGCACTGGATCCCTTCGAAACTGGAG
	novel_mir101	-	CTTGGTCCCGACTGTTGTTCT	GTTATCAGTTGGAAGCCCTAGAGAC	TATGTATGATTTTGTTATGTAGTTATCAGTTGGAAGCCCTAGAGACTGCATTAAAGCAGAACACAATTGTTTACTTGGAGACTGGTTCTGGAAAGACCTTGATTGCAATTATGCTTCTTAGAAGCTATGCTTACCTTCTTCGAAAGCCGTCTCCGTACATAGCTGTTTTCTTGGTCCCGACTGTTGTTCTAGTGACTCAGGTAGTACATC
	novel_mir102	-	TGCCAAAGGAGAGTTGCCCTATGATTGC	TTGTAGGGCAGTTCTCCGTTTGGCAG	TGAAGCAGTTGTAGGGCAGTTCTCCGTTTGGCAGATATATGATTATAAATATAATCTGCCAAAGGAGAGTTGCCCTATGATTGCTTCT
	novel_mir103	-	TGGAAACTTGGATTTTATCGGAGTTAATG	ACTCCGATAAGATCTAAGTTTCCAA	AGGTCTGTAACATGGCCACAATTACTGTAGAAGTCAAGAATAAAATGTGGTCATAATGAGTGCTACTGGTTCTTAAAAATCAAAATTCTCAATCGACCTCGTCCCTCATTTTTTTCTTTGGAAATTATTAACTCCGATAAGATCTAAGTTTCCAAAGGCTTTAATATTACTCATCGAGTAAATGGTGATGAGTTGGTAATGTTAAGGCATTTGGAAACTTGGATTTTATCGGAGTTAATGACTTTTGAAGGAAAGAAATGAGTGGCGAGGTCGATGGAGAATTTTGATTTTTCAGAACCAGTAGCACTCATTATTACTACATTTTGTTCGCAGATACTGCAGTGATTGTAGCCATTTTATGGACTC
	novel_mir104	-	ATACGCTAAATATGGAGTTTTAA	TATAACTCCATATTCAGCGTATTCA	ATTGTGGCTCACCAGATGGTCTTCCGGTGACTTCGCCAAGGGTCCAACTCAGTGATGGGAGATATTTAGCCTACAAACAGGGTGGTGTTGCCAAGGAGAAGGCAAAGCACAACGTCATTATTGTTCATGACTTCGATAGTTCCAAAGACTTGATGTTACCAATATCCGAAGTATGAAAACTTTTATAACTCCATATTCAGCGTATTCAATTTAGTAGCTATTATGTATGTTGTGTCCAAGTTCGCTTGCACCTGCAATGCGGTTGAAACTCAGGAAAATCTTGCTGAGTCCAATCTTTAACGTTGGACTCATAATTTTTTTTCTGATTTTCAACCATATTGCAGGTACAATCGAACTTGGAGATAACATATATACATAACAGATACTAAACTGAATACG…
	novel_mir105	+	TCACTGAGTTGGACCCTTGGCGAAGTCACC	GAGCCACAATCTTTTGGAGTT	ATCTCCCATCACTGAGTTGGACCCTTGGCGAAGTCACCGGAAGACCATCTGGTGAGCCACAATCTTTTGGAGTTGGAGGC
	novel_mir106	-	GGCCGAGTGGTCTAAGGCG	AGATTTAGGCTCTGGTCCGAA	AACTAGCAACCAAGAAGGTATATAAGACGGTTTGGCCGAGTGGTCTAAGGCGCCAGATTTAGGCTCTGGTCCGAAAGGGCGTGGGTTCAAATCCCACAGCTGTCACTTTTTTTTTTCCCTTTTTAAAGTTTAGTA
	novel_mir107	+	TTTCTAGCTTTTCCTTCCTCCT	GAGGAAGGAACTGCTACAAATGGT	ATGAAGATCTCCATCAGCACCAGAAGATTTACTATTCACTTCTACGACATCATCATCATTCGCTTCTAACTCTTCTACTCTTTTTTGGATCAGTCAAACATCCACACCACCATTTCTAGCTTTTCCTTCCTCCTAAAGTGATACTCTACTTTCTAACTCTTTCAACTGTTCTAAATACAACTCCAATTTGGCCTCAACTTTACCTTTTTCGCTCTTTACCTTCTCATTTTTCCTCTACATATTCTTCAATCAATTCTCCATCAATTGAAGGATATGCAGAAAAAATATGAGCACCTACAAAATGAAAAAGCTAAAGTTGAGCCAAAACTAAAGATGTATTTAGAAAACTTGACATAGTTAGAAAGTAGAGTATCACTTTAGGAGGAAGGAACTGCTACA…
	novel_mir108	+	GTGTGGATCCATTAAAACTTCAAGAATTGA	TTTTTGAAGTTCTAATGGATCCATGCAGTT	TCAATCCTCAAAATGAAGGCCAACTTTAAAGAGTTACAAGTTCTTGATTTAGGAGACAATCACTTTAACGACACATTCCTCATGTGGTTGGAAACTCTGCCAGAGCTGCAAGGTTTAGGTTTGAGATCAAATAAATTGTGTGGATCCATTAAAACTTCAAGAATTGAAGACATGTTTCCCCAACTTCAAATTGCAGATCTATCTTACAATATCTTTTTGGGAAACTTACCAACGAGTTTGTTTCAACATTTGAAAGCTATGAGGTCAATTGATTAGACAATGAAATTACTAGAATATCTTGGAGAAGGAGATCACCAAGTTTGAACAACAGTTGCAACCAAGGGACTTGAGCTTGAACTTGTCATAATTTTGACGGCTTACATTAGTATTGATCTTTCA…
	novel_mir109	+	AAACACGCCTCCGATCTTGCAACATGAG	ATGTGGAAGATCGGGAGTGTATCTAAG	CTATTGACAGTCTTAAAAACATCTCTTAACTTGACTAAATGAACTTAAACACGCCTCCGATCTTGCAACATGAGTGAAATACATCTCTAAATTCTCACCAAGTTTATGACTATTTTCATCACTTCTCTCGACTTTTTATTAAGAACATCATACTTTTACAAGAGTTTGAAACTAGTTGTTATGTCATGTGGAAGATCGGGAGTGTATCTAAGTTTAGTTGGTCAAGTAAATAAGGGTTTTTAAGGTTGTCAATAT
	novel_mir110	-	TACTTTCAGTTTACCTTATTTCTA	AGGGTTAGCTTTTGGAAAATGGAA	GCAATGTTTCAAAATTTCAATAGGCCACATTTTGAAGAGTGGCAACTGTCAAGTGTTTTAAAGCTTCCTTACGCTACATTTTACAGGACGTTGAAGATGAAGAGGGTTAGCTTTTGGAAAATGGAAACTACGGAGTTATCTGAAGAGTTAGGGAATAAGACTTTTTTCTTGGATGATTTGTAAGTCTATTCGCTCATTAATTTTATAATTGGTAACTTTAAACAAGCTTTTACTTTCAGTTTACCTTATTTCTATTTTTATTACAGTCTTTTGAAGGAGCATTGA
	novel_mir111	+	GGAGTTAGATCGGCTGGAGTAGCTACTTAC	AGTAGAGCCGACTCTAACATTCGACCAGA	AAGCTGGATCCTCTGGAGTTAGATCGGCTGGAGTAGCTACTTACCTTACTGGTGTTCAAAGAAGTCTGTTGGTACAGATGTCATATGAGATGTGAAAGCAATTTCCGACTTAAAGACTACTAGTTGAAGTAGAGCCGACTCTAACATTCGACCAGAGAGGTCAGTGCTG
	novel_mir112	+	AGTTTCTCTTGTAGCTTGACTAGA	AGTGTCTGAAAGGAAGCAAC	ACTATCAACTTCGAATTCCTTAGTTTTGAGAATTTGACAAAGTAGTTTCTCTTGTAGCTTGACTAGACCCTGTTCTTTAGCTTTTGATCTAGTGTCTGAAAGGAAGCAACAACCACCAAATTGTCGAAATATTCGATTGTAGATAGC
	novel_mir113	-	CTCTCTTTTGGTCAAAAGCGGTATAGGC	TAGCTGGTTCCATGATCTAGGAAGTCA	CGGGGAGAGGCACGAACTTAAGGAGCTAACTTAAGCTTGGTCGATAGTCGTTCCGGTCCTAGCTGGTTCCATGATCTAGGAAGTCAATCTAATCTCTCTTTTGGTCAAAAGCGGTATAGGCTGTGAATCGAATCTGTCTGTCCTCTAACCA
	novel_mir114	-	ACTATGTGAATCTCCCTTTCTTT	GAGAGTGGAGACTTACAAGTTATTTAGTG	TTGAAGAGAGTGGAGACTTACAAGTTATTTAGTGTAAGAAGTTCATACTATACAACAATAAATGTGTCTTCGTCTCAAACAAGTTGGGATTGACTATGTGAATCTCCCTTTCTTTAT
	novel_mir115	-	TACTCATTTGGGCAAGAAGTTTTAC	GAAAGCCTCTTGCTCAAATGAGTATTC	CACTTCTTTGGGAAAGCCTCTTGCTCAAATGAGTATTCCAACAAATGTCTAATTGACATACTTTGAGATACTCATTTGGGCAAGAAGTTTTACCAGGAAGTT
	novel_mir116	-	TTCTGCTTGGCCATTCGCAGGGTAGA	AATCTTGTTGAAATTGGTTGCACTGTCA	TTATTGAATCTTGTTGAAATTGGTTGCACTGTCATATGATTCTGCTTGGCCATTCGCAGGGTAGATGC
	novel_mir117	-	TATTTTTGTTATGTTTGTGTT	AACAAGCAATACACAAATAAAATTAGTA	AGGAATATGAGAGTGTGATGAGTCTATAAATAGAAGGCTTCATTAGTGTAGAGGAGTCACAAACAAGCAATACACAAATAAAATTAGTAGCTTAAACAAGATGAAGTGTTTATTTTTGTTATGTTTGTGTTTGGTTCCCATTGTGGTGTTTTCATCAACTTTCACTTCCC
	novel_mir118	-	GGTTTGGTGTAAACACTCGGTGC	CGTCGGGTGTTTACATCAAACCA	ATTTATCCGCGTCGGGTGTTTACATCAAACCAATAAAGTTAATCTTATCGGTTAACAATTAAGGGAAAATACATTAACCATGGTTAAGTGTTAAATATGTATGTGAAAGACATGCGTCTTGCATTTATTGGTTTGGTGTAAACACTCGGTGCGGGTAAGC
	novel_mir119	+	AGGCTTTTAAGGCCGTAAAAAGTCCGAA	ATCAAAGGACGTCTTGGCCATCTCCG	ACTTTTAACTTCTTAATAACTACGATGGATTAACCTGTAAATTCCTAGGAGGCTTTTAAGGCCGTAAAAAGTCCGAAACAATCAAAGGACGTCTTGGCCATCTCCGGGGTGAGGTTAATGAAGAAGTTATTAAGAATATAGGTTAAAAGG
	novel_mir120	-	GTCCTAGATCAATTATTGGGGTTGATTTTT	ATTCAGCCCTTTGTCGCTCCGATTCG	TTTGAAAAATGTTTCAAATTGCTGCCACGATCCACTGAGATTCAGCCCTTTGTCGCTCCGATTCGTCCCCCCCCCCCCCCCTCCCCCCCCCCCCCCACCGCGACCCCATCAAAATTAGGTCCTGGGTCAAATCTCAGGGTCAAATTTTGGAACGGTTATTGGGGTCTTGTCCTAATTTGGGTGTCAGGATCGGGTCCTAGATCAATTATTGGGGTTGATTTTTAGATAAAAAATTATTTTCCTATAGAATATTTTTTAGT
	novel_mir121	-	TATGTTTTTCATTTTCTATGTTTAAAAA	TGAATGTGAGTGATATTCA	ATTTGAGGCCAAACACATGGTGTAATTCCCCACAAACTTGGGGCCAAACGCTAGCTTAATTTGTGATTATGTTTTTCATTTTCTATGTTTAAAAATTGAATGTGAGTGATATTCATGTTTGTCCTTAGAA
	novel_mir122	-	GTTGCATCTAATGCTTCATAAGCAGATTC	TCAGTTTGAAGCTTGGCTAGATGTTGCTGA	CAAAACTGATGAGGTGACTCAGTTTGAAGCTTGGCTAGATGTTGCTGATTTTAACATGAAAAATCGTTTGAAACAATTGGAAAATGAAGTTGCATCTAATGCTTCATAAGCAGATTCATCTCTACATTAGTTTTT
	novel_mir123	-	TGTGCACCGGTCGTCTCGTCCCTTC	TTTGGGATGGGCCGGCCGGTCCGCCCTAG	CTAGTGCTAGGAGCCGCGGTAATTCCAGCTCCAATAGCGTATATTTAAGTTGTTGCAGTTAAAAAGCTCGTAGTTGGACTTTGGGATGGGCCGGCCGGTCCGCCCTAGGTGTGCACCGGTCGTCTCGTCCCTTCTGTCGGCGATGCGCTCCTGGCCTTAATTGGCCGGGTCGTGCCTCCGGCGCTGT
	novel_mir124	-	ACTGCCTTGAAGTACAATTTCCCTTGA	AGGGAACGTTTTGTTGGCTAAGTCAC	GGCAAGGAATGACGCATGCGCCCGCCGTCCGCTTGCCGACCCGCAGTAGGGGCCATTAGCCCCCAAGGGAACGTTTTGTTGGCTAAGTCACCGGGACGGAAGTGGCGCGGTGACTGCCTTGAAGTACAATTTCCCTTGAGCGGTGGGTAGAAATCTTTGCA
	novel_mir125	-	ACCTCTAAATTTCTAGGTGGTCAATGG	TCATCGCTAAATTTAGGTGTC	TAGATCCCTAGAAAGAGGAGCAACTAAGAAGAGAGGGGTATAAAAGAAGGAAAGGAATGTCTTCGATCTGGCTCTTGTTCCCTGTAGGTTTATAGCACGCTAGGCTAGCTAAGAAAGGTATTCTATCTTTCTCTTTTTGTTGTTCGGCTCGATAGAATTGTTTAGAATCCTCTCCTACGCCATGGATAGGATCACCTCTAAATTTCTAGGTGGTCAATGGGATCATCGCTAAATTTAGGTGTCTAAGTGGAATTTCGAGCCAAATTTAGGTGTCTC
	novel_mir126	+	GAAAAACTTCCAGACTATGCCATCCTA	GGCGCTGTTAGGAAGTAAGTACCTT	TTAATTCCTGAATATCATAAGCATGATTAAATAAGTTTATATTAGTTATTATATACTAGAATTATTTAAGCATGTTTTTTAGTTTGTTAACATGAGGAAAAAAGGAAAAACTTCCAGACTATGCCATCCTAAAGTTGAAACCATAGGCAAGAGAAGCCGTGAGGGGAGTAAACGCTGTTGAGGCGCTGTTAGGAAGTAAGTACCTTTGAAAGTACGGTGTTAACAGTGACCGGGAAACATGTTAAAATAATCTAGTTTATAGTAATCTAATATAAATCATTTGTTATGCATATGGTATAAGGGAATTAT
	novel_mir127	-	GGTACTTTCGTTGGAGCCTCCTA	CGAGGCCAAGAAAGGACTGTAGCT	AGTTAGCGAGGCCAAGAAAGGACTGTAGCTCGGGTACTTTCGTTGGAGCCTCCTAATC
	novel_mir128	-	CCGACGTCGGCTGACCGTTGTGTGCAAGC	ATGCGGGCAGGCCACGGCCGACGTCGACT	AGGGCGATGCGGCCAGGCCACGGCCGATGCGGGCAGGCCACGGCAAGACAAGGGCGATGTGGGCAGGCCACGCTCGACGTCGGCTGAGCGATGTGCATAGGCCAAGGGCGATGCGGGCAGGCCACGGCCGACGTCGACTGAGCGATGTGTGCAAGACAAGGGCGATGTGGGCAGGCCACGCTTGACGTCGACTGAGCGATGTGTGCAAGCCAAGGGCGATGCGGGCAGGCCACGCCCGATGCGGGCATGCCACGTCCGACGTCGGCTGACCGTTGTGTGCAAGCCAAGGGCAATGCGGGCAGGCCACGCCCG
	novel_mir129	-	ATGTGGGCAGGCCACGCTCGACGTCGGCT	CGATGCGGGCAGGCCACGGCAAGACAAGG	ACGGCCGACGTCGGCTGACCGTTGTGTGCAAGCCACGGCCGAAGCGGGCAGTCCACGGCCGACGTCGACTGACCGTTGTGTGCATGCCACGGCCGATGCGGGCAGGCCACGGCAAGACAAGGGCGATGTGGGCAGGCCACGCTCGACGTCGGCTGAGCGATGTGCATAGGCCAAGGGCGATGCGGGCAGGCCACGCCCGACGTCGGCTGA
	novel_mir130	+	CTAGTACCGAACCCACTGGCTGTC	GGCCGGGGGACGGACTGGGAAC	GTGTTTGGCATGGGGGTCCTAGTACCGAACCCACTGGCTGTCGATGAACTGCATGAGTTGATCCCGCAGAAATATTGGGTCGGCGTGTGCCGGCCGGGGGACGGACTGGGAACGGTTCCTTCGGGGGCCTTCCCCGGGAGTCAAACAA
	novel_mir131	+	GCACCGCCGACCGACCTTGATC	AGAAGGGTTCGAGTGTGAGCATACC	GGCTGTGGGCTCCCCATTCGACCCGTCTTTAAACACGGACCAAGGAGTTTGACATGTGTCCGAGTCAACGGGCTAGTAAATTCATAAGGCATAAGGAATCTGATTGGTGGGATCCTCTTGAGGGGTGCACCGCCGACCGACCTTGATCTTCTGAGAAGGGTTCGAGTGTGAGCATACCTGTGGGGACCCGAAAGATGGTGAACTATGCCTGAGAGGGGAGAAGCCAAAGCA
	novel_mir132	+	TACCGTGTGCTGGATTATGACTGAACGCCT	TCTGAATTCAGGCAAGAAGCGAAGCT	TGGTTGAAAAGCTGGTGGCACGAAGCTACCGTGTGCTGGATTATGACTGAACGCCTCTAAGTCTGAATTCAGGCAAGAAGCGAAGCTTGCGCTCGCCGTCAGCTTGCCGACCC
	novel_mir133	-	AGAAGCTGCTAAAAATCGTGTTGT	CACGATTTTTAGCAGCTTCTTCC	CCATCGGCACCACAAGCTTTAATATTCACTTCTACAACATGATCATCCTTCGCTTCCAAATCTTCTACCATTTTTTGGATCACTCAGACATCCACAACACGATTTTTAGCAGCTTCTTCCTCCTGAAGTGATACTCTACTTTCCAACTCTTTTAGCTTTTCCAAGCATAACTTCAGTTTTGGCTCAAATTTAGCTTTTCCATTTTTTTCCTCCTCATTTTTCCTCTACATATCCTTCAATCGATTCTCCATCGATTAAAGGATATGCAAAGGAAAAATCAGCAGCTAAAAAAGGAAGAAGCTGAAGTTGAGGCAAAACTAAACATGTATTTGGAAAAGTTGAAACAGTTTGAAAGTACAGTATTACTTTAGGAGAAAGAAGCTGCTAAAAATCGTGTTG…
	novel_mir134	+	AGCCAAGGATGACTTGCCTAAAAC	TTAGGCGTTGTCTGAGGCTAATC	AGAGGTTTTGTATGAAGATAAAGTGCCTGCTCTGATAGCCAAGGATGACTTGCCTAAAACCCTTTTTATGAAGGGTCATTAATTAATTAAACTTTAGTTACTAAAATTAAAGTTTATATTATATGATCCTAAAATTGGGATTTTAGGCGTTGTCTGAGGCTAATCTGAGAGGCACTTATCTTTCATGTAACACCTTC
	novel_mir135	+	GGCTGTTGGTCACGACTACTAT	CGTGCGACTCGGCGGCTTA	AGGGTCGAAAGGTTTGAGAATGTAGCTTTCCCCGTCCCCCCTTCGTCGGGCGGTGCTTGTGTGGAGGGTGCGCCACCTGAAATCGGGCTTGAAGCTCTCACCTTACCAACAAGCTGAGAGCTGATGGCTGTTGGTCACGACTACTATAAAAAAGTTCCTATGAAGATGAATATTTCACATGGAGGAGTGTTCATCTTTATGTTGGGTGATCTTCTGTCGTGCGACTCGGCGGCTTATGTGCGACTTCTGGCCCACGCCTCCTATTTGTTCAGGGCGGGCGGCGTGAACTCTGATTCGATCCG
	novel_mir136	+	GATTGAACTAGGGAGGATCGGT	GGTTAGAACCTCTCCGCAGTTCTCG	CGCTTGTAGCGGTTGGTTAGGCTAGGCCGGTTAGAACCTCTCCGCAGTTCTCGATTCTGATTGAACTAGGGAGGATCGGTATTGCTGGGGGAGATTGTTCTTCCTCAGCTGGCTTGTTAACCATGGTCTCTTGAAGGTTTCATTCTTTTACCAGCTCTCCCAACCAACAACCTGCTAACCCTAAGCTTGCAAGCA
	novel_mir137	+	ACTGATTGGCCACCTTCTTGTCGGTGA	TCACCAAGAAGGGCATAATCAACA	AATGGTAACACTGAGTCTATCCAATAACCTACTGTACTGATTGGCCACCTTCTTGTCGGTGATTAGGATATCATCACCAAGAAGGGCATAATCAACAAACGGGGTGCTTCGTAGCGGATAAGCCTTCAAAGTCGCCAACCACACTATATAGTGATGGGACAGCGAGAACAGTGACCATG
	novel_mir138	-	ACAACCAAACTTTGTGAAAATTGGCTGCCA	CAGCCACATTTGTGAAAGTTGGTAGTCAA	CCACAAATGTGAAAGTTGGCAGCCACATTTGTGAAAGTTGGTAGTCAAATTTTGGAAGAGTTTTGGTGGAGTTTGACAACCAAACTTTGTGAAAATTGGCTGCCACATTTGTGT
	novel_mir139	+	AACCTTTCTTATCAGCAGAAGAACT	ACTTCTAGGATCTGCTCTGAGAGAATTGAC	TTGATTATAAATGACATTTGCCTTGGCTAAAGACAATTGTAGCATGATATGTGCCAAACCTTTCTTATCAGCAGAAGAACTTCTAGGATCTGCTCTGAGAGAATTGACGCATAATTTATAGTCAT
	novel_mir140	+	TGATTGGTGGCGACTCGGATGGCATCTGA	TGACCAATCTCCCCATCATGA	GCCGTGGAAGTTATAGTAGTTCTAGCAGAGTAAGCTAGAAGATGACCAATCTCCCCATCATGATTCATGATTGGTGGCGACTCGGATGGCATCTGATTAACTAGCGCAGGAGAGTGAGTTCCTTCCACATTCAAGTAAAGAACTTGTCTCTACTTTTCTCTCGCTTCTTCATTTTATTGTGTGAGATGCTTAACTCTCCATGTGA
	novel_mir141	+	ATATCTTGAAATCGCTGCCTTGGCA	TTGGCAGCGATTTTTGTAGAAATA	TACAAAAAATATATATATATATATATCTTGAAATCGCTGCCTTGGCAGCGATTTTGGTGGAACTAGTTTTCTATTAAAAAAAATCGCTGCTTTGGCAGCGATTTTTGTAGAAATATTTTTTTATTTTATTTTATTGTT
	novel_mir142	+	ACTTTGTGAAATGACTTGAGAGGTGTAGT	ACTACTTTTAATGTTATTTTACTTA	ACCGTGTTGAGCTTGACTAGGTCCGACTTTGTGAAATGACTTGAGAGGTGTAGTAAAAGTGGGCGCGGAAAGGCGAAAACAAAATACAACTACTTTTAATGTTATTTTACTTATTCTATGAATCAGAAGCGGGGTGTTGCTTCTCATTATGGATCTAAGGTTTGCTTCACGGG
	novel_mir143	-	CACTGAGTTGGACCCTTGGCG	ACCAAGGGTCCAACTCAGTGA	ATTGTGGTTCACCAGATGGTCCTCCGGTGACTTCACCAAGGGTCCAACTCAGTGATGGGAGATATTTAGCCTACAAACAGGTTGGTGTTGCCAAGGAGAAGGCAAAACACAACGTCATTATTGTTCATGGCTTCAATAGTTCCAAAGACTTGATGCTACCAATATCCGAAGCATGAAAATTTTTATAACTCCATATTCAGCGTATTCAATTTAGTATCTATTATGTATGTTATGTCCAAGTTCGCTTGCACATGCAATGACGTTGAAACTCAGGAAAATATTGCTGAGTCCAATCTTTAACGTTGTACTCAGCAAAACTTTTCTGACTTTCAACCATATTGCAAGTGCAAGCGAACTTGGACATAACATACATAATAGATACTAAAATGAATACACTAA…
	novel_mir144	-	AGTGATTATTTCTCCTTGAAAATGGGTG	TCACGATTTTCAGTCCCTTATATACTTGG	CCTTGTTTCTCAGCATGTGTGATCTTGTTGGTCACGATTTTCAGTCCCTTATATACTTGGATTTTGTCTCAGTGATTATTTCTCCTTGAAAATGGGTGGCAAGGTCAACAGAGAGACGAGA
	novel_mir145	-	GAGCAACAAATTGGGTCTATCTATGATTCT	TGGAGATCCAAGTTGTTCGGA	CTTCCCTATCAACTCACAAATTTCGCGCTTGTAGTATCAATAACTTCTTACGCTAGCCTATCAGGTCATTCAAATAATATCTGCAGGTTCAATTTCACGAAGAATATATCATACATGGAGATCCAAGTTGTTCGGATTTATAGTAACTATAACTAGTTAGCTCTCTGGAGCAACAAATTGGGTCTATCTATGATTCTCATTTGATTCTAGTGCTAGTTGTGTAGAGAAAGGGGGAAT
	novel_mir146	+	AGGATAGTGATAAAGTAAGCACTCACACTA	GTGCTTATCAATTTTTTCCTCCT	CACAAAATAAGACGCGTGCTTATCAATTTTTTCCTCCTTGGAGGATAGTGATAAAGTAAGCACTCACACTACAAATGTGGGCATACCCACATGACACACTTTTATTCCTACTTTAAATTATTGTCTTGTTTTGTC
	novel_mir147	+	GAGTTAAGCTGGACAACAAGGTGTCACGG	TGACAAAAGGCTCCATCGGAAAGTCAGG	ATTGGGCTTGAGTTAAGCTGGACAACAAGGTGTCACGGTCTTAGACTTTTATTAAACATATTGTGCGGTACTTGACTATTCGTTCACGAACTTTATAAAAAATTCATGAGTAAACTGTCAAGTGTCGTATAGAGAGCTTAGTTAGAGTCTAAGTCCGTGACAAAAGGCTCCATCGGAAAGTCAGGTTGAAA
	novel_mir148	+	GAGAAACGGACCGCAGCGCAACGACTAGGA	TGGTCTGCGCGGTCAAATCGGC	AAGCCGAGAAACGGACCGCAGCGCAACGACTAGGACTCGTGTCGGAGGAGTTTTGAGCGTGAGCTAACACTCATGCAGCGGCTCATTTGGTCTGCGCGGTCAAATCGGCTC
	novel_mir149	+	TGGACAAACGATATCCGGTCAGGC	GCTGGATCCTTTTAGATCTACGG	GTTTTTGTTTTGTTTGTGGACAAACGATATCCGGTCAGGCCTATGGCTGGATCCTTTTAGATCTACGGGCCGGCCGGCCCCGGCCGTTTACATGAGCATAGGGAATCTATACTCGAGCGTTCCACTGGGCCCCTGACAGGATAGGTGAGGAATCACTCTGGATCTTCTTTTTTTGGGCTACAACTTCGCCGAGCCGACTAGCATCCCTTTCCACTGTGCATTTTTCGAACAAAGAA
	novel_mir150	+	ATAGTAAGTTACTTCTTCGTCTTTTGCTT	GTCATTGGATTGGAAGCCGCAGGCGATGCC	ATGGATGCTGTAGGAGAGGTTGGGAAGGAGGGACTTCGCTAAAGATGGTCTGTCTGTGCGCGAGGAAGGTCTTTTTCCTTTCTCCTTCCATTGCTTGACTAGGTTCGCTTTGCAAGGAAGGGAAGGCATCCGTGCAGGTAGAAAAGGGCGGAGGTCAAGCTATGGGCACAAGGAGGTAAGGTATAGTAAGTTACTTCTTCGTCTTTTGCTTGTCATTGGATTGGAAGCCGCAGGCGATGCCTTCTTGCTTGTGTAGTTGTGACGGTTTTCAA
	novel_mir151	+	TGTGCCACGACGAAACAAGGGA	GAATGAAAGGCCGCTTTGCGTTGGATGCTC	GAAGGCGGCAAGGGCCGACGAAGGGTGGAAAACGAAGGGCGTTTTCTGGTCCCCCCTGAGCTGGGGGGTGCTTGTGGGGGGGGGGGTGTGCCACGACGAAACAAGGGAATGAAAGGCCGCTTTGCGTTGGATGCTCTTTAACCTCCCCACAATGATGGCTCTGTTGTCTTG
	novel_mir152	+	GGCGCAAGTCACTCGAGCCTTGTA	GCAGGTACCTTGCGCCTTC	ACAGTGTTGATTTGAATCAACACTGTAAAATTTAGTTGTGTAATTGAAATTTTGGGAGAGGCGCAAGTCACTCGAGCCTTGTAAAGCGCAGGTACCTTGCGCCTTCCTCTGCAAAAAAAATTATACATTTTTTACATTGCAGTGTTGAATCAAATCAACACTGC
	novel_mir153	+	TTGCCATAGACTTGCGAGG	CGTAGACTGATATAGCAAACT	CCTTAGTCTAGGCTTAGACTAGTGTTGCCATAGACTTGCGAGGTTTCGGATGTCGTTGGGCAGTGAAACTTTTTCCGACGTCATTTCGGACGATTAGCTCCTCGTAGACTGATATAGCAAACTGGAGTCTGCTAGTCTGAGCCTTAGCTAGGT
	novel_mir154	+	CGGCCGTAAGCACTCCGCTCGTTCGT	AGGAGCTTACTTCGAGTATTTATGACTCTG	AGAGCAAGACCCAGGAGGCTCGCAGCTACCACGGCCGTAAGCACTCCGCTCGTTCGTAAGCCCCTTTAGAGATAGGGGCGAGCCAGGAGCTTACTTCGAGTATTTATGACTCTGGTGGCAACACGTGACAGGCGAATGACATGATTCTCGAGGAGTTACAAGACGGCCATGTGATGATGCAAGATTTATGGAGTTCCGGTCATCTCC
	novel_mir155	-	CGTCTGCCTGGGCGTCACGCGT	CGCAGAGCGTCCGGGGGGACGTGTGCTGC	TCGCAGAGCGTCCGGGGGGACGTGTGCTGCTCTTTAAACACAAACGACTCTCGGCAATGGATATCTCAGCTCTCGCATCGATGAAGAATGTAGCGATATGCGATACTTGGTGTGAATTGCAGAATACCGTGAAGCATCGAGTCTTTGAACGCAAGTTGCGCCCGAAGCCATTAGGCTGAGGGCACGTCTGCCTGGGCGTCACGCGT
	novel_mir156	-	TTCCCGTATCGGCCTTTACTTGCACTTAA	TAACGGTCAGCCGATGTCGGGCGTGGC	TGGCCAGTCGACGTTGGGGGTGGCCTTCCCGTATCGGCCTTTACTTGCACTTAACGGTCAGCCGATGTCGGGCGTGGCCTTCCCACATCGCCCTTGACCTGTGCACATCGCTCAGTCGACGTCGGGCGTGGACTGCCTGCATCTCCCTTGTCTTGCACACAACGGTCAGCCAACGTCGGACGTGGCCT
	novel_mir157	-	CTTTGCCTCTATTTTTCCATAAAGG	TTTTGATAAAGTAGAGGTAATG	TTGAGTGGGAATCTCTTTTTTGATAAAGTAGAGGTAATGGAATATCTTTTCCAAAAGTGAGTTGTCTTGTAGCTTCTCTTTGGAGGCTAATTTAGAATAGTGAAATGCCACTATATGGAAAAATAATTTCGGCTTTGCCTCTATTTTTCCATAAAGGTCTTTTTCCTATTCAT
	novel_mir158	+	TTAAGGAGGAACAGTGAGGAAGTAGCCGTA	AGGCGAAAAACTGTTCATGGCCTAAAGGGA	ATTATGTTGTGAGTATTGTATTGTATGGTGTTTGTAAAAATAATTATATGAAATAAACAGTTGGTTTTTATACCCCTCTTCTTATAATTTCTTTAATAGTCTTAAAGTGAAGGTTGCAATCTTCAGCCTTAAGGAGGAACAGTGAGGAAGTAGCCGTAAAACTGAGGTTGTTAGGCGAAAAACTGTTCATGGCCTAAAGGGAGAACTTCTGCGGAAGTGATAAGGACTGTTCATCGAAGAAAGAGAAGAAAGGTATACACGCAAACTTTTGTTTCATATTATTAATTTTACAAATATACCATATGGCATACATTACTTAAACATAAA
	novel_mir159	+	GTACCTAATGTTTTTCTAAGATGGATG	TGTTCTCTCAGAAAACTTAGTCTGCCTT	ATAATAAGAAAATACTTTTCCCTGGCGGGAGAAGTACTACTCACTCACAAAAACTCATATTGGAAGGTACCTAATGTTTTTCTAAGATGGATGTTCTCTCAGAAAACTTAGTCTGCCTTCTTCATATGAAGTTCCTCTCCTTTTATAGATAGAAGGAGGGACTTATTAC
	novel_mir160	+	AGCCTAAGCCCCAAATCCCTGAGACACA	GTCTCAGGGATTTTAGGCATAGGCTGGGG	TGGGAAAATGCATAAGTACCCCCCAGCCTAAGCCCCAAATCCCTGAGACACACCTAACCTTTACTAAGGTCCTATTACCCCCCCAAACTTATTTTATATATAATTGTCTACCCCTTTTCGGCCTACGTGGCACTATCCTTAACAAAATTGTCAACATGCGCTGGGCCCACAAGATAGGTGTGTCTCAGGGATTTTAGGCATAGGCTGGGGGGGTACTTATGCATTCTCCCT
	novel_mir161	-	ATGAGACATCTGATTAAAAGAGGAATT	TAATTGTTTTTAATTGGTGTCTGGTACT	TTTGTTTATTGCAAAAGAAAATTAATTGTTTTTAATTGGTGTCTGGTACTCGTATTGAAGTCCGACTAATTTGAATTTGTATCAAATAAGGCATTATTCAGGATGAAGATCTCCTTAGCAGGAATTTTTTTCATACTCAAGACTCGACTATGAGACATCTGATTAAAAGAGGAATTGTCTTATCCATTGTACCACATGCTTTGGTGGTAGTTATTGCAATATGACAAC
	novel_mir162	-	ACGTCCTGGCCATCTCCGGGGTGGGGTTAA	ACCTGTAAATTCCTAGGATGTTTCC	GTTAGCCTTTAACTTCTTAATAGCAACGATGGATTAACCTGTAAATTCCTAGGATGTTTCCACGGCCTTCAAAGTCCAAATAGGACGTCCTGGCCATCTCCGGGGTGGGGTTAATGAAGAAGCTATTAAGAATACAGGTTAAA
	novel_mir163	+	TGGTATAATCTGTTTGCGTTGAAAGGG	TTTTAATTGTTGTGGCTGATTTGCGGTGTT	GTAGAGTTTTTCACAAGGATCGTCATGGTATAATCTGTTTGCGTTGAAAGGGTCTCGTTTTTTCAGAAATTGGTGATCAAGGAGCTGCCCATTTTAATTGTTGTGGCTGATTTGCGGTGTTTTAGGCATCTGTTTGTGCTAAATTTTGG
	novel_mir164	-	CTTTAGGGTTTTAGGTTAAGGGTTTTATCT	TAGGGTATAGGACCTAGGGTTTAT	ATGATTTAGGGTTTCTTAAGGTTTAGAACTTCTTAGGGTTTTAGGTAGGGTATAGGACCTAGGGTTTATTAGCTTTAGGGTTTTAGGTTAAGGGTTTTATCTAGCTTTTTAGGGTTTAGGGCTTTGGGAGTTTTAGGTTAA
	novel_mir165	+	GCTAACATGAGGAAAAAAGAGAAA	TTTGAAAGTACGATGTTAGTAGT	TTAATTCCTGAATATCATAACATGATAGAATAAAATCTATATTAGTTGTTATTTACTAGAATTATTGTTAGTATGTTTTCTAGTTTGCTAACATGAGGAAAAAAGAGAAAACTTCCAGACTATGTCATCCTAACGTTGAAACCATAGGCAGAGAAGCCGTAAGGGGAGTAAACAAAGTTGAGGCGATGTTAGGAAGAAAGTATCTTTGAAAGTACGATGTTAGTAGTGACAGGGAAACATAGTAAAAATAATCTAGTTCATAGCAATCTGATATAAGTGAAATTCATCAAGGTTATGATATGAGGGAATTGT
	novel_mir166	+	GTGGGCTCCCCATTCGACCCGTCTT	GAAGGGTTCGAGTGTGAGCATACC	GCGCTTCTGGCGTGCTTCGACATCTGTGTGCTCCGGACACTGGCTGTGGGCTCCCCATTCGACCCGTCTTTAAACACGGACCAAGGAGTTTGACATGTGTCCGAGTCAACGGGCTAGTAAATTCGTAAGGCATAAGGAATCTGATTGGTGGGATCCTCTTGAGGGGTGCACCGCCGACCGACCTTGATCTTCTGAGAAGGGTTCGAGTGTGAGCATACCTGTTGGGACGCGAAAGATGGTGAACTATGCCTGAGCGG
	novel_mir167	+	GCTTATGATGTTCTAGCTTAGGATTAGCT	GTCTCGAGTTACGTCAAGGGGGT	ATATTCTTATCTAATATGCTTATGATGTTCTAGCTTAGGATTAGCTTAGGGTCACTCGTGATCCTAGGTCTCGAGTTACGTCAAGGGGGTAGCCTCGGGGAATGA
	novel_mir168	+	AGTTACGACCATTTGAAATTCAGCAT	ACTTCAAACGGCCATAACTCGGGC	CTCGAAAAAATACGAGGATTCAAAAAAAATATTGCGTCAAACGGACGCTCGAGGCGAAAGTTACGACCATTTGAAATTCAGCATCTTAAAGAGCGAAGGTGGCTTTGAATTTATGCAACTTCAAACGGCCATAACTCGGGCCTCGGGTGTCCGTTTAAGGCGATTTTTTTTTTGAATTCGCGTATTTTTTCGAT
	novel_mir169	+	ACTCGTCGGGCGGTCGGAGCG	TATGTCATTTTCAATCCCGGCGTATTTCGG	GCGGGGAGGGTCCTTTTAAGTAGATGACTCGTCGGGCGGTCGGAGCGGGACTTCTTTGGGAAAAAGAACTTGAATAAGTTTGTTTTTCTGAAGGAGTCGTCATTTTCTATCAGGAACGCTATGTCATTTTCAATCCCGGCGTATTTCGGATGCTTGACTTTCTTTGA
	novel_mir170	+	AATTAGATTCATTGTTTGA	TGAAAACGCGGATTTGGTTCAC	GCTGGCTAAGCTGCTCCACCAGGTCTAATTTCCGGCCGGGAGATGGTTTGTATGGATGGTTCGGGCAGCCGGTTCCGGAACCACGAGCTTCCTGAGAGAGTTTGAATTAGATTCATTGTTTGAAAACGCGGATTTGGTTCACTTTCGGTCGATTGACCGGTGGTTTGGTTGTTCTTAAGGCTAGG
	novel_mir171	+	GAATGTGAAAGACAGAAAGAGAAGAAA	ACTTCTTTTTATGTTTTCGCGATCAGT	TGGAGAATTTTGACAGAGAAATCACCCGTTACAAATTGGATTCGATGAGTTTGGGGTGACTTGAATGTGAAAGACAGAAAGAGAAGAAAAGACTTCTTTTTATGTTTTCGCGATCAGTCCC
