# Supplementary material for: A comparative analysis of small RNA sequencing data in tubers of purple potato and its red mutant reveals small RNA regulation in anthocyanin biosynthesis
Source: PeerJ. 2023 May 19;11:e15349. doi: 10.7717/peerj.15349 (PMC10202107; doi:10.7717/peerj.15349)
Supplement: Table S6 [file peerj-11-15349-s006.xlsx]

## Sheet: Sheet1
	Table S6 Differentially expressed miRNAs between SD92 and SD140
	miRNA	Expression		Fold Change (SD140/SD92)	log2Fold Change	Up/down regulation	Q value
		SD92	SD140
	miR156	0.0866667	17.4033	200.808	7.64967	UP	0
	miR156f-3p_6	0.11	0.446667	4.06061	2.0217	UP	1.20581e-07
	miR156f-5p	0.693333	2.52333	3.63942	1.86371	UP	1.12982e-31
	miR160a-5p	0.087	0.587	6.74713	2.75427	UP	4.02817e-12
	miR162a-3p	2.63	103.7	39.4297	5.30121	UP	0
	miR164e-5p	0.04	0.54	13.5	3.75489	UP	2.3099e-13
	miR164f_1	0.163333	0.34	2.08163	1.05772	UP	0.000274258
	miR166d-5p_2	10.2767	20.7067	2.01492	1.01072	UP	1.32042e-130
	miR166g-3p	3.72333	11.7767	3.16294	1.66126	UP	5.19787e-126
	miR166k	2.10667	4.77333	2.26582	1.18004	UP	4.34511e-36
	miR166n	0.496667	1.20333	2.42282	1.27669	UP	1.28535e-11
	miR168b_1	0.696667	1.55	2.22488	1.15373	UP	6.28121e-13
	miR170-5p	0.024	0.266667	11.1111	3.47393	UP	3.33337e-07
	miR171a-3p	0.024	0.127333	5.30556	2.4075	UP	0.000869242
	miR171b-3p	1.31667	14.2103	10.7927	3.43198	UP	2.20804e-270
	miR171b-3p_2	0.0603333	0.19	3.14917	1.65497	UP	0.000689672
	miR319a-5p	11.2167	27.4167	2.44428	1.28941	UP	2.18135e-224
	miR319c_1	0.126667	0.38	3	1.58496	UP	6.23442e-06
	miR394a_1	1.13	3.17333	2.80826	1.48968	UP	7.27671e-32
	miR396a-5p	19.6767	86.93	4.41792	2.14337	UP	0
	miR482b-5p_4	0.333333	0.666667	2	1	UP	4.74533e-06
	miR530a	0.183667	0.433333	2.35935	1.23839	UP	2.69309e-05
	miR1886h	0.31	0.71	2.29032	1.19555	UP	2.13136e-07
	miR6027-5p	16.2967	37.11	2.27715	1.18723	UP	8.57872e-276
	miR7981-3p	0.186667	1.87	10.0179	3.3245	UP	3.11292e-37
	miR7981f	0.546667	1.49	2.72561	1.44658	UP	6.17049e-16
	miR7984a	5.02333	13.41	2.66954	1.41659	UP	2.46332e-120
	miR7990b	0.0633333	0.356667	5.63158	2.49354	UP	1.44689e-07
	miR7996a	0.383333	0.816667	2.13043	1.09115	UP	1.55405e-07
	miR8001a	0.92	2.9	3.15217	1.65635	UP	2.72576e-32
	miR8007a-5p	1.82333	4.17333	2.28885	1.19462	UP	4.74779e-33
	miR8008a	0.0633333	0.23	3.63158	1.8606	UP	0.000106378
	miR8008b	0.163333	0.573333	3.5102	1.81155	UP	1.11097e-08
	miR8010	0.323333	1.15333	3.56701	1.83472	UP	2.44151e-15
	miR8016	14.4167	32.4133	2.24832	1.16885	UP	1.12191e-236
	miR8025-3p	1.43	8.52	5.95804	2.57484	UP	9.43757e-136
	miR8030-5p	7.84333	15.7367	2.00637	1.00459	UP	5.15589e-99
	miR8031	0.93	4.79667	5.15771	2.36673	UP	9.70633e-72
	miR8032a-5p	1.95667	4.38	2.2385	1.16253	UP	4.99462e-34
	miR8037	0.0733333	0.226667	3.09091	1.62803	UP	0.000266029
	novel_mir5	20.96	55.0833	2.62802	1.39398	UP	0
	novel_mir11	3.11667	11.3467	3.64064	1.86419	UP	2.60838e-135
	novel_mir25	61.8933	148.897	2.4057	1.26646	UP	0
	novel_mir26	0.001	5.74667	5746.67	12.4885	UP	9.9459e-87
	novel_mir38	0.490333	2.32333	4.73827	2.24436	UP	5.55647e-35
	novel_mir47	19.9333	43.26	2.17023	1.11785	UP	1.54254e-302
	novel_mir54	68.2733	290.963	4.26174	2.09144	UP	0
	novel_mir60	10.6267	28.1567	2.64962	1.40579	UP	8.96319e-249
	novel_mir61	2.34	9.26667	3.96011	1.98554	UP	6.87347e-118
	novel_mir75	3.39	9.31333	2.7473	1.45801	UP	4.1786e-87
	novel_mir92	8.17	21.6733	2.65279	1.40751	UP	2.42e-192
	novel_mir104	1.95733	114.933	58.7193	5.87576	UP	0
	novel_mir105	0.001	0.164	164	7.35755	UP	1.20863e-05
	novel_mir110	2.86	5.72667	2.00233	1.00168	UP	9.17966e-38
	novel_mir114	2.46667	8.27333	3.35405	1.74591	UP	2.16352e-93
	novel_mir116	0.450333	2.86667	6.36566	2.67031	UP	1.32239e-48
	novel_mir121	1.48	3.66333	2.47523	1.30756	UP	4.59177e-32
	novel_mir128	74.4767	152.383	2.04605	1.03284	UP	0
	novel_mir143	1.87067	68.1167	36.413	5.18638	UP	0
	novel_mir147	15.26	39.48	2.58716	1.37137	UP	0
	novel_mir152	2.17667	4.56333	2.09648	1.06797	UP	7.00301e-33
	novel_mir156	0.830333	1.78	2.14372	1.10011	UP	1.61223e-14
	novel_mir164	0.540667	8.93	16.5166	4.04585	UP	1.92944e-188
	novel_mir167	7.63	48.9767	6.41896	2.68234	UP	0
	novel_mir168	7.52	19.5967	2.60594	1.3818	UP	7.95555e-173
	miR156a-5p	14.9333	3.09667	0.207366	-2.26975	DOWN	1.0301e-101
	miR162a-5p_1	2.94	1.27667	0.43424	-1.20343	DOWN	1.2361e-06
	miR166d-5p_1	5.10667	2.29333	0.449086	-1.15494	DOWN	2.09579e-09
	miR167a	66.47	19.4033	0.291911	-1.7764	DOWN	4.37334e-268
	miR167a-5p	886.46	348.5	0.393137	-1.3469	DOWN	0
	miR167b-3p_2	3.02667	0.51	0.168502	-2.56916	DOWN	2.32679e-26
	miR167c-3p_3	2.23333	0.42	0.18806	-2.41074	DOWN	3.25911e-18
	miR167d_1	10.6933	4.39333	0.410848	-1.28332	DOWN	1.47159e-22
	miR169a-5p	23.0733	10.1533	0.440046	-1.18427	DOWN	4.49716e-39
	miR169d-5p_1	0.877	0.014	0.0159635	-5.96908	DOWN	1.55986e-16
	miR169v_1	4.72667	1.92	0.406206	-1.29972	DOWN	4.8185e-12
	miR172a_1	0.846667	0.28	0.330709	-1.59637	DOWN	0.000105951
	miR172a-5p_4	0.966667	0.156667	0.162069	-2.62532	DOWN	3.91302e-10
	miR172b	0.583333	0.014	0.024	-5.38082	DOWN	1.70146e-11
	miR172b-5p_2	0.420333	0.0403333	0.0959556	-3.38149	DOWN	5.85447e-07
	miR172c-5p	0.433333	0.064	0.147692	-2.75933	DOWN	7.73303e-06
	miR172e-3p	36.8633	12.7367	0.34551	-1.5332	DOWN	1.34319e-109
	miR172e-3p_1	1.26333	0.28	0.221636	-2.17374	DOWN	1.11489e-09
	miR172e-5p	5.77667	1.15667	0.200231	-2.32026	DOWN	4.35259e-41
	miR172k	1.53667	0.543333	0.353579	-1.49989	DOWN	3.28722e-06
	miR319-3p	2.93033	0.593333	0.20248	-2.30415	DOWN	1.16248e-21
	miR319b_1	2.02333	0.37	0.182867	-2.45114	DOWN	3.99746e-17
	miR319c	23.58	11.6767	0.495194	-1.01394	DOWN	2.08345e-26
	miR319c_2	3.34333	1.05	0.314058	-1.6709	DOWN	1.85114e-14
	miR319c-5p_3	0.296667	0.0503333	0.169663	-2.55926	DOWN	0.000284788
	miR393-3p	0.716667	0.23	0.32093	-1.63967	DOWN	0.000173831
	miR395b_3	55.37	0.52	0.00939137	-6.73445	DOWN	0
	miR395g	2.85667	0.49	0.171529	-2.54348	DOWN	1.1616e-24
	miR396a-3p_1	54.24	15.0667	0.277778	-1.848	DOWN	1.44416e-241
	miR396b	436.107	103.89	0.238222	-2.06962	DOWN	0
	miR396h	6.93667	2.98667	0.430562	-1.21571	DOWN	9.74056e-14
	miR398	6.08	1.00667	0.16557	-2.59449	DOWN	2.16439e-51
	miR398a-3p	5.05333	1.93	0.381926	-1.38863	DOWN	3.18691e-14
	miR398a-3p_1	4.36333	0.52	0.119175	-3.06885	DOWN	1.83803e-46
	miR398b	3.60667	1.59667	0.442699	-1.1756	DOWN	1.2103e-07
	miR398b-3p_1	0.626667	0.113333	0.180851	-2.46713	DOWN	1.02989e-06
	miR399_1	0.63	0.113333	0.179894	-2.47478	DOWN	1.02989e-06
	miR399a_2	166.333	66.5333	0.4	-1.32193	DOWN	0
	miR399a_6	177.947	29.27	0.164487	-2.60395	DOWN	0
	miR399a-5p_3	4.07333	0.583333	0.143208	-2.80382	DOWN	9.5832e-39
	miR399d	14.6733	0.343333	0.0233985	-5.41744	DOWN	7.22106e-238
	miR399e_3	1.31	0.0506667	0.0386768	-4.69239	DOWN	6.53091e-22
	miR399f_1	0.307	0.0403333	0.131379	-2.92819	DOWN	4.6246e-05
	miR399g-3p_1	1.19367	0.150333	0.125942	-2.98916	DOWN	8.47705e-14
	miR399i	55.0433	4.65333	0.0845395	-3.56423	DOWN	0
	miR399j_2	172.137	25.2133	0.146473	-2.7713	DOWN	0
	miR408a-3p	1.54333	0.493333	0.319654	-1.64542	DOWN	1.97823e-07
	miR408d	0.393667	0.001	0.00254022	-8.62083	DOWN	1.48433e-08
	miR477a-5p_3	0.257333	0.014	0.0544041	-4.20014	DOWN	9.47138e-06
	miR477b-3p_2	34.4833	15.6	0.452392	-1.14435	DOWN	3.45103e-49
	miR477b-5p_1	68.27	31.5567	0.462233	-1.11331	DOWN	3.2389e-90
	miR482d-5p_3	6.91	2.33333	0.337675	-1.56629	DOWN	1.19223e-23
	miR482e-5p	14.71	5.31667	0.361432	-1.4682	DOWN	1.61828e-41
	miR530b_4	13.8867	5.42667	0.390783	-1.35556	DOWN	2.25016e-33
	miR827	0.393333	0.0766667	0.194915	-2.35908	DOWN	9.60691e-05
	miR827-5p_3	1.70333	0.693333	0.407045	-1.29674	DOWN	1.52805e-05
	miR10539	0.297	0.0506667	0.170595	-2.55135	DOWN	0.000284788
	miR2111a-5p	11.3067	2.59333	0.229363	-2.12429	DOWN	2.16276e-67
	miR6025a	26.9633	12.3767	0.459018	-1.12338	DOWN	1.46565e-37
	miR6026-5p	1.70667	0.813333	0.476562	-1.06926	DOWN	0.000744781
	miR8011a-3p	4.53	0.346667	0.0765269	-3.70789	DOWN	8.7939e-59
	miR8033-5p	1.07667	0.306667	0.28483	-1.81183	DOWN	1.1214e-06
	miR8036-5p	2	0.886667	0.443333	-1.17354	DOWN	5.90382e-05
	miR8038a-5p	1.56	0.443333	0.284188	-1.81508	DOWN	1.04185e-08
	miR8044-3p	1.88	0.203333	0.108156	-3.20881	DOWN	4.65658e-22
	miR8044-5p	7.94	1.62667	0.20487	-2.28722	DOWN	3.56303e-53
	miR8155	17.5833	3.95667	0.225024	-2.15185	DOWN	2.48632e-108
	novel_mir2	0.810667	0.001	0.00123355	-9.66297	DOWN	6.55454e-15
	novel_mir3	16.7533	0.444	0.0265022	-5.23774	DOWN	2.71154e-263
	novel_mir7	3.34333	0.001	0.000299103	-11.7071	DOWN	3.73267e-47
	novel_mir10	8.11	3.91333	0.482532	-1.0513	DOWN	9.24196e-11
	novel_mir12	47.0567	7.06	0.150032	-2.73666	DOWN	0
	novel_mir13	10.99	0.983333	0.0894753	-3.48237	DOWN	1.61479e-128
	novel_mir16	14.2267	5.72667	0.40253	-1.31283	DOWN	1.69106e-30
	novel_mir19	9.47333	0.140667	0.0148487	-6.07352	DOWN	6.4109e-155
	novel_mir20	20.53	4.07667	0.198571	-2.33227	DOWN	1.75316e-137
	novel_mir31	4.2	0.001	0.000238095	-12.0362	DOWN	1.66658e-56
	novel_mir32	5.38333	0.001	0.000185759	-12.3943	DOWN	5.97037e-69
	novel_mir34	15.8767	0.490333	0.0308839	-5.017	DOWN	6.74934e-245
	novel_mir41	25.1367	8.33	0.331388	-1.5934	DOWN	4.37449e-79
	novel_mir42	8.93667	0.140667	0.0157404	-5.98938	DOWN	4.20147e-146
	novel_mir43	39.3067	7.25	0.184447	-2.43872	DOWN	5.616e-279
	novel_mir48	5.76	0.001	0.000173611	-12.4919	DOWN	2.52665e-72
	novel_mir53	5.61667	0.130667	0.0232641	-5.42575	DOWN	2.99194e-90
	novel_mir55	7.46	1.10367	0.147945	-2.75687	DOWN	6.10861e-67
	novel_mir67	11.23	0.354	0.0315227	-4.98746	DOWN	3.18507e-173
	novel_mir69	14.2867	0.933667	0.0653523	-3.93562	DOWN	1.87134e-186
	novel_mir71	28.1967	2.41667	0.0857075	-3.54443	DOWN	0
	novel_mir78	42.93	19.3033	0.449647	-1.15314	DOWN	2.93304e-61
	novel_mir81	9.39	1.21367	0.129251	-2.95175	DOWN	3.06539e-90
	novel_mir84	82.77	37.6733	0.455157	-1.13556	DOWN	3.40985e-114
	novel_mir89	7.41	0.154	0.0207827	-5.58847	DOWN	3.26623e-120
	novel_mir93	8.59	0.440333	0.0512612	-4.28599	DOWN	2.69296e-122
	novel_mir100	2.07667	0.001	0.000481541	-11.0201	DOWN	3.70732e-32
	novel_mir102	145.767	49.13	0.337046	-1.56898	DOWN	0
	novel_mir106	46.4567	17.08	0.367654	-1.44358	DOWN	1.04111e-123
	novel_mir111	7.98333	0.127333	0.0159499	-5.97031	DOWN	2.50898e-130
	novel_mir113	21.59	0.830333	0.0384592	-4.70053	DOWN	0
	novel_mir117	8.50667	3.21333	0.377743	-1.40452	DOWN	3.8771e-22
	novel_mir125	9.16667	0.127333	0.0138909	-6.16972	DOWN	9.44742e-150
	novel_mir133	2.55	0.440333	0.17268	-2.53383	DOWN	1.1343e-21
	novel_mir135	4.74	0.001	0.00021097	-12.2107	DOWN	4.84655e-62
	novel_mir136	12.19	1.57667	0.129341	-2.95075	DOWN	1.66378e-116
	novel_mir137	5.73	0.297	0.0518325	-4.27	DOWN	7.11665e-82
	novel_mir140	7.79667	1.397	0.179179	-2.48053	DOWN	1.58693e-60
	novel_mir141	258.007	56.7333	0.219891	-2.18514	DOWN	0
	novel_mir142	318.237	155.323	0.488075	-1.03483	DOWN	0
	novel_mir148	26.25	2.58	0.0982857	-3.34687	DOWN	5.07877e-288
	novel_mir149	42.0067	2.63033	0.062617	-3.9973	DOWN	0
	novel_mir150	10.5167	0.263667	0.0250713	-5.31782	DOWN	5.86454e-167
	novel_mir151	15.4833	1.45033	0.0936706	-3.41626	DOWN	6.27368e-176
	novel_mir154	13.9933	0.154	0.0110052	-6.50567	DOWN	8.02702e-227
	novel_mir169	47.17	3.16333	0.0670624	-3.89835	DOWN	0
	novel_mir170	4.81333	0.140667	0.0292244	-5.09668	DOWN	8.27129e-77
