# Supplementary material for: A comparative analysis of small RNA sequencing data in tubers of purple potato and its red mutant reveals small RNA regulation in anthocyanin biosynthesis
Source: PeerJ. 2023 May 19;11:e15349. doi: 10.7717/peerj.15349 (PMC10202107; doi:10.7717/peerj.15349)
Supplement: Table S7 [file peerj-11-15349-s007.xlsx]

## Sheet: Sheet1
	Table S7 Target gene prediction of differentially expressed miRNAs
	miRNA id	Target id	miRNA id	Target id	miRNA id	Target id	miRNA id	Target id	miRNA id	Target id
	novel_mir105	PGSC0003DMT400019164	novel_mir128	PGSC0003DMT400087886	miR156a-5p	PGSC0003DMT400061560	novel_mir170	PGSC0003DMT400021731	miR172b	PGSC0003DMT400049622
	novel_mir105	PGSC0003DMT400019165	novel_mir128	PGSC0003DMT400089110	miR156a-5p	PGSC0003DMT400063045	novel_mir170	PGSC0003DMT400022141	miR172b	PGSC0003DMT400049624
	novel_mir143	PGSC0003DMT400019164	novel_mir128	PGSC0003DMT400089203	miR156a-5p	PGSC0003DMT400063046	novel_mir170	PGSC0003DMT400022142	miR172b	PGSC0003DMT400061634
	novel_mir143	PGSC0003DMT400019165	novel_mir128	PGSC0003DMT400089746	miR156a-5p	PGSC0003DMT400068752	novel_mir170	PGSC0003DMT400022145	miR172b	PGSC0003DMT400061635
	miR171b-3p	PGSC0003DMT400012104	novel_mir128	PGSC0003DMT400091502	miR156a-5p	PGSC0003DMT400072745	novel_mir170	PGSC0003DMT400022146	miR172b	PGSC0003DMT400065311
	miR171b-3p	PGSC0003DMT400023277	novel_mir128	PGSC0003DMT400091537	miR156a-5p	PGSC0003DMT400072746	novel_mir170	PGSC0003DMT400024907	miR172b	PGSC0003DMT400065312
	miR171b-3p	PGSC0003DMT400031475	novel_mir128	PGSC0003DMT400092947	miR156a-5p	PGSC0003DMT400074958	novel_mir170	PGSC0003DMT400031693	miR172b	PGSC0003DMT400065313
	miR171b-3p	PGSC0003DMT400033037	novel_mir128	PGSC0003DMT400093136	miR156a-5p	PGSC0003DMT400076399	novel_mir170	PGSC0003DMT400031694	miR172b	PGSC0003DMT400065499
	miR171b-3p	PGSC0003DMT400066799	novel_mir128	PGSC0003DMT400094279	miR156a-5p	PGSC0003DMT400082789	novel_mir170	PGSC0003DMT400038732	miR172b	PGSC0003DMT400065500
	novel_mir54	PGSC0003DMT400081781	novel_mir128	PGSC0003DMT400094579	miR156a-5p	PGSC0003DMT400082790	novel_mir170	PGSC0003DMT400038733	miR172b	PGSC0003DMT400065501
	novel_mir61	PGSC0003DMT400005770	novel_mir128	PGSC0003DMT400096440	miR156a-5p	PGSC0003DMT400084733	novel_mir170	PGSC0003DMT400038734	miR172b	PGSC0003DMT400065502
	novel_mir61	PGSC0003DMT400010966	novel_mir128	PGSC0003DMT400096779	miR156a-5p	PGSC0003DMT400084734	novel_mir170	PGSC0003DMT400038735	miR172b	PGSC0003DMT400071726
	novel_mir61	PGSC0003DMT400010970	novel_mir128	PGSC0003DMT400097443	miR172e-5p	PGSC0003DMT400002832	novel_mir170	PGSC0003DMT400047076	miR172b	PGSC0003DMT400071727
	novel_mir61	PGSC0003DMT400010987	miR166d-5p_2	PGSC0003DMT400013987	miR172e-5p	PGSC0003DMT400026930	novel_mir170	PGSC0003DMT400048434	miR172b	PGSC0003DMT400071728
	novel_mir61	PGSC0003DMT400012121	miR8030-5p	PGSC0003DMT400006966	miR172e-5p	PGSC0003DMT400026931	novel_mir170	PGSC0003DMT400048435	miR172b	PGSC0003DMT400071729
	novel_mir61	PGSC0003DMT400020342	miR8030-5p	PGSC0003DMT400006967	miR172e-5p	PGSC0003DMT400026932	novel_mir170	PGSC0003DMT400049658	miR172b	PGSC0003DMT400071730
	novel_mir61	PGSC0003DMT400020349	novel_mir84	PGSC0003DMT400013500	miR172e-5p	PGSC0003DMT400028154	novel_mir170	PGSC0003DMT400059321	miR172b	PGSC0003DMT400071731
	novel_mir61	PGSC0003DMT400020353	novel_mir78	PGSC0003DMT400002032	miR172e-5p	PGSC0003DMT400028537	novel_mir170	PGSC0003DMT400059322	miR172b	PGSC0003DMT400071732
	novel_mir61	PGSC0003DMT400020354	novel_mir78	PGSC0003DMT400059106	miR172e-5p	PGSC0003DMT400029812	novel_mir170	PGSC0003DMT400059323	miR172b	PGSC0003DMT400071734
	novel_mir61	PGSC0003DMT400020355	novel_mir78	PGSC0003DMT400074918	miR172e-5p	PGSC0003DMT400029865	novel_mir170	PGSC0003DMT400063787	miR172b	PGSC0003DMT400077340
	novel_mir61	PGSC0003DMT400020356	miR8036-5p	PGSC0003DMT400074536	miR172e-5p	PGSC0003DMT400029866	novel_mir170	PGSC0003DMT400084315	novel_mir53	PGSC0003DMT400070583
	novel_mir61	PGSC0003DMT400020357	miR8036-5p	PGSC0003DMT400074537	miR172e-5p	PGSC0003DMT400029867	novel_mir170	PGSC0003DMT400085709	novel_mir53	PGSC0003DMT400070584
	novel_mir61	PGSC0003DMT400020359	miR8036-5p	PGSC0003DMT400074538	miR172e-5p	PGSC0003DMT400030279	novel_mir170	PGSC0003DMT400087143	novel_mir89	PGSC0003DMT400017880
	novel_mir61	PGSC0003DMT400020360	miR8036-5p	PGSC0003DMT400074539	miR172e-5p	PGSC0003DMT400030280	novel_mir170	PGSC0003DMT400088247	novel_mir89	PGSC0003DMT400017881
	novel_mir61	PGSC0003DMT400036058	miR8036-5p	PGSC0003DMT400076108	miR172e-5p	PGSC0003DMT400035002	novel_mir170	PGSC0003DMT400088613	novel_mir89	PGSC0003DMT400017882
	novel_mir61	PGSC0003DMT400062366	miR8036-5p	PGSC0003DMT400076109	miR172e-5p	PGSC0003DMT400035858	novel_mir170	PGSC0003DMT400089728	novel_mir89	PGSC0003DMT400017883
	novel_mir61	PGSC0003DMT400071638	miR530b_4	PGSC0003DMT400002881	miR172e-5p	PGSC0003DMT400036858	novel_mir170	PGSC0003DMT400091337	novel_mir89	PGSC0003DMT400017884
	novel_mir61	PGSC0003DMT400080261	miR530b_4	PGSC0003DMT400002882	miR172e-5p	PGSC0003DMT400036859	novel_mir170	PGSC0003DMT400091431	novel_mir89	PGSC0003DMT400017885
	novel_mir61	PGSC0003DMT400087433	miR530b_4	PGSC0003DMT400002883	miR172e-5p	PGSC0003DMT400036860	novel_mir170	PGSC0003DMT400097518	novel_mir89	PGSC0003DMT400017886
	miR171b-3p_2	PGSC0003DMT400012104	miR530b_4	PGSC0003DMT400002884	miR172e-5p	PGSC0003DMT400044600	miR172b	PGSC0003DMT400004461	novel_mir89	PGSC0003DMT400017887
	miR171b-3p_2	PGSC0003DMT400066799	miR530b_4	PGSC0003DMT400002885	miR172e-5p	PGSC0003DMT400044601	miR172b	PGSC0003DMT400010229	novel_mir42	PGSC0003DMT400022983
	novel_mir75	PGSC0003DMT400009919	miR530b_4	PGSC0003DMT400005374	miR172e-5p	PGSC0003DMT400046148	miR172b	PGSC0003DMT400010230	novel_mir42	PGSC0003DMT400049168
	novel_mir75	PGSC0003DMT400025179	miR530b_4	PGSC0003DMT400057127	miR172e-5p	PGSC0003DMT400054200	miR172b	PGSC0003DMT400010231	novel_mir42	PGSC0003DMT400049169
	novel_mir75	PGSC0003DMT400044602	miR530b_4	PGSC0003DMT400065500	miR172e-5p	PGSC0003DMT400054201	miR172b	PGSC0003DMT400014871	novel_mir135	PGSC0003DMT400012791
	novel_mir75	PGSC0003DMT400044603	miR530b_4	PGSC0003DMT400065501	miR172e-5p	PGSC0003DMT400077781	miR172b	PGSC0003DMT400014872	novel_mir135	PGSC0003DMT400012792
	novel_mir75	PGSC0003DMT400066815	miR530b_4	PGSC0003DMT400065503	miR172e-5p	PGSC0003DMT400081843	miR172b	PGSC0003DMT400016583	novel_mir135	PGSC0003DMT400012793
	miR530a	PGSC0003DMT400002881	miR530b_4	PGSC0003DMT400066926	miR172e-5p	PGSC0003DMT400081845	miR172b	PGSC0003DMT400016584	novel_mir32	PGSC0003DMT400008838
	miR530a	PGSC0003DMT400002882	miR530b_4	PGSC0003DMT400078574	miR172e-5p	PGSC0003DMT400081847	miR172b	PGSC0003DMT400016585	novel_mir32	PGSC0003DMT400008840
	miR530a	PGSC0003DMT400002883	novel_mir117	PGSC0003DMT400034892	miR172e-5p	PGSC0003DMT400084961	miR172b	PGSC0003DMT400016881	novel_mir32	PGSC0003DMT400008841
	miR530a	PGSC0003DMT400002884	novel_mir117	PGSC0003DMT400042521	miR172e-5p	PGSC0003DMT400086979	miR172b	PGSC0003DMT400016882	novel_mir32	PGSC0003DMT400008842
	miR530a	PGSC0003DMT400002885	novel_mir117	PGSC0003DMT400042522	miR172e-5p	PGSC0003DMT400093231	miR172b	PGSC0003DMT400016883	novel_mir32	PGSC0003DMT400008843
	miR530a	PGSC0003DMT400025984	novel_mir117	PGSC0003DMT400053189	miR172e-5p	PGSC0003DMT400095208	miR172b	PGSC0003DMT400017979	novel_mir32	PGSC0003DMT400008844
	miR530a	PGSC0003DMT400057127	novel_mir117	PGSC0003DMT400067828	novel_mir136	PGSC0003DMT400053002	miR172b	PGSC0003DMT400017980	novel_mir32	PGSC0003DMT400008845
	miR530a	PGSC0003DMT400065500	novel_mir117	PGSC0003DMT400078029	novel_mir149	PGSC0003DMT400065792	miR172b	PGSC0003DMT400017981	novel_mir32	PGSC0003DMT400008846
	miR530a	PGSC0003DMT400065501	novel_mir117	PGSC0003DMT400079093	novel_mir149	PGSC0003DMT400080386	miR172b	PGSC0003DMT400018346	novel_mir32	PGSC0003DMT400018517
	miR530a	PGSC0003DMT400065503	novel_mir117	PGSC0003DMT400080077	novel_mir137	PGSC0003DMT400016564	miR172b	PGSC0003DMT400022987	novel_mir32	PGSC0003DMT400020118
	miR530a	PGSC0003DMT400066926	novel_mir117	PGSC0003DMT400081915	novel_mir137	PGSC0003DMT400083809	miR172b	PGSC0003DMT400028701	novel_mir32	PGSC0003DMT400023384
	miR530a	PGSC0003DMT400078192	novel_mir117	PGSC0003DMT400094328	novel_mir67	PGSC0003DMT400022066	miR172b	PGSC0003DMT400028702	novel_mir32	PGSC0003DMT400028878
	miR530a	PGSC0003DMT400078193	novel_mir106	PGSC0003DMT400095354	novel_mir67	PGSC0003DMT400043940	miR172b	PGSC0003DMT400028703	novel_mir32	PGSC0003DMT400033517
	miR530a	PGSC0003DMT400087008	novel_mir106	PGSC0003DMT400097068	novel_mir67	PGSC0003DMT400078485	miR172b	PGSC0003DMT400028704	novel_mir32	PGSC0003DMT400036860
	miR530a	PGSC0003DMT400089244	miR482e-5p	PGSC0003DMT400079092	novel_mir170	PGSC0003DMT400001378	miR172b	PGSC0003DMT400028705	novel_mir32	PGSC0003DMT400042984
	miR530a	PGSC0003DMT400089289	miR156a-5p	PGSC0003DMT400029748	novel_mir170	PGSC0003DMT400003907	miR172b	PGSC0003DMT400028706	novel_mir32	PGSC0003DMT400042986
	novel_mir128	PGSC0003DMT400084794	miR156a-5p	PGSC0003DMT400029749	novel_mir170	PGSC0003DMT400006512	miR172b	PGSC0003DMT400031398	novel_mir32	PGSC0003DMT400043273
	novel_mir128	PGSC0003DMT400085053	miR156a-5p	PGSC0003DMT400029750	novel_mir170	PGSC0003DMT400012314	miR172b	PGSC0003DMT400031399	novel_mir32	PGSC0003DMT400045298
	novel_mir128	PGSC0003DMT400085062	miR156a-5p	PGSC0003DMT400029751	novel_mir170	PGSC0003DMT400012316	miR172b	PGSC0003DMT400031400	novel_mir32	PGSC0003DMT400045299
	novel_mir128	PGSC0003DMT400085242	miR156a-5p	PGSC0003DMT400056372	novel_mir170	PGSC0003DMT400012317	miR172b	PGSC0003DMT400031401	novel_mir32	PGSC0003DMT400070230
	novel_mir128	PGSC0003DMT400085263	miR156a-5p	PGSC0003DMT400056373	novel_mir170	PGSC0003DMT400016873	miR172b	PGSC0003DMT400031402	novel_mir32	PGSC0003DMT400081909
	novel_mir128	PGSC0003DMT400085796	miR156a-5p	PGSC0003DMT400056374	novel_mir170	PGSC0003DMT400018447	miR172b	PGSC0003DMT400044386	novel_mir32	PGSC0003DMT400081911
	novel_mir128	PGSC0003DMT400085947	miR156a-5p	PGSC0003DMT400058753	novel_mir170	PGSC0003DMT400018521	miR172b	PGSC0003DMT400044387	novel_mir32	PGSC0003DMT400088998
	novel_mir128	PGSC0003DMT400086941	miR156a-5p	PGSC0003DMT400059813	novel_mir170	PGSC0003DMT400018522	miR172b	PGSC0003DMT400048138	novel_mir32	PGSC0003DMT400091480
	novel_mir128	PGSC0003DMT400087495	miR156a-5p	PGSC0003DMT400060830	novel_mir170	PGSC0003DMT400021730	miR172b	PGSC0003DMT400049621	novel_mir32	PGSC0003DMT400094117
