# Supplementary material for: A comparative analysis of small RNA sequencing data in tubers of purple potato and its red mutant reveals small RNA regulation in anthocyanin biosynthesis
Source: PeerJ. 2023 May 19;11:e15349. doi: 10.7717/peerj.15349 (PMC10202107; doi:10.7717/peerj.15349)
Supplement: Table S8 [file peerj-11-15349-s008.xlsx]

## Sheet: Sheet1
	Table S8 Top 20 of the enrichment pathways
	Rank	Pathway	SD92-vs-SD140 DEGseq	All-Unigene	Rich factor	Qvalue	Pathway ID	Level 1 pathway term	Level 2 pathway term	DEGseq list
	1	Plant hormone signal transduction	24	1262	0.0190174	4.53761e-05	ko04075	Environmental Information Processing	Signal transduction	PGSC0003DMT400017981; PGSC0003DMT400056373; PGSC0003DMT400059813; PGSC0003DMT400072745; PGSC0003DMT400012104; PGSC0003DMT400058753; PGSC0003DMT400017980; PGSC0003DMT400029751; PGSC0003DMT400031475; PGSC0003DMT400063046; PGSC0003DMT400087143; PGSC0003DMT400056374; PGSC0003DMT400084733; PGSC0003DMT400029749; PGSC0003DMT400017979; PGSC0003DMT400076399; PGSC0003DMT400084734; PGSC0003DMT400072746; PGS…
	2	Plant-pathogen interaction	24	1658	0.0144753	0.00680064	ko04626	Organismal Systems	Environmental adaptation	PGSC0003DMT400017881; PGSC0003DMT400062366; PGSC0003DMT400020342; PGSC0003DMT400020359; PGSC0003DMT400017887; PGSC0003DMT400017882; PGSC0003DMT400020356; PGSC0003DMT400063787; PGSC0003DMT400017886; PGSC0003DMT400010987; PGSC0003DMT400020353; PGSC0003DMT400020357; PGSC0003DMT400017885; PGSC0003DMT400036058; PGSC0003DMT400013987; PGSC0003DMT400020354; PGSC0003DMT400012121; PGSC0003DMT400017883; PGS…
	3	TGF-beta signaling pathway	5	153	0.0326797	0.108188	ko04350	Environmental Information Processing	Signal transduction	PGSC0003DMT400087143; PGSC0003DMT400014871; PGSC0003DMT400089728; PGSC0003DMT400030279; PGSC0003DMT400030280
	4	ECM-receptor interaction	3	71	0.0422535	0.291558	ko04512	Environmental Information Processing	Signaling molecules and interaction	PGSC0003DMT400017981; PGSC0003DMT400017980; PGSC0003DMT400017979
	5	Protein digestion and absorption	3	99	0.030303	0.521681	ko04974	Organismal Systems	Digestive system	PGSC0003DMT400017981; PGSC0003DMT400017980; PGSC0003DMT400017979
	6	Relaxin signaling pathway	3	115	0.026087	0.521681	ko04926	Organismal Systems	Endocrine system	PGSC0003DMT400017981; PGSC0003DMT400017980; PGSC0003DMT400017979
	7	Amoebiasis	3	120	0.025	0.521681	ko05146	Human Diseases	Infectious diseases: Parasitic	PGSC0003DMT400017981; PGSC0003DMT400017980; PGSC0003DMT400017979
	8	Linoleic acid metabolism	3	121	0.0247934	0.521681	ko00591	Metabolism	Lipid metabolism	PGSC0003DMT400081909; PGSC0003DMT400081911; PGSC0003DMT400020118
	9	AGE-RAGE signaling pathway in diabetic complications	3	131	0.0229008	0.538633	ko04933	Human Diseases	Endocrine and metabolic diseases	PGSC0003DMT400017981; PGSC0003DMT400017980; PGSC0003DMT400017979
	10	Platelet activation	3	133	0.0225564	0.538633	ko04611	Organismal Systems	Immune system	PGSC0003DMT400017981; PGSC0003DMT400017980; PGSC0003DMT400017979
	11	Circadian rhythm - plant	3	338	0.00887574	0.579226	ko04712	Organismal Systems	Environmental adaptation	PGSC0003DMT400025984; PGSC0003DMT400087143; PGSC0003DMT400089728
	12	Citrate cycle (TCA cycle)	3	151	0.0198675	0.579226	ko00020	Metabolism	Carbohydrate metabolism	PGSC0003DMT400026931; PGSC0003DMT400026930; PGSC0003DMT400026932
	13	alpha-Linolenic acid metabolism	3	155	0.0193548	0.579226	ko00592	Metabolism	Lipid metabolism	PGSC0003DMT400081909; PGSC0003DMT400081911; PGSC0003DMT400020118
	14	Signaling pathways regulating pluripotency of stem cells	2	72	0.0277778	0.579226	ko04550	Cellular Processes	Cellular community - eukaryotes	PGSC0003DMT400087143; PGSC0003DMT400089728
	15	Human papillomavirus infection	5	377	0.0132626	0.640752	ko05165	Human Diseases	Infectious diseases: Viral	PGSC0003DMT400017981; PGSC0003DMT400017980; PGSC0003DMT400017979; PGSC0003DMT400030279; PGSC0003DMT400030280
	16	Focal adhesion	3	181	0.0165746	0.677141	ko04510	Cellular Processes	Cellular community - eukaryotes	PGSC0003DMT400017981; PGSC0003DMT400017980; PGSC0003DMT400017979
	17	Viral carcinogenesis	4	286	0.013986	0.677141	ko05203	Human Diseases	Cancers: Overview	PGSC0003DMT400078193; PGSC0003DMT400078192; PGSC0003DMT400030279; PGSC0003DMT400030280
	18	Gap junction	2	96	0.0208333	0.724246	ko04540	Cellular Processes	Cellular community - eukaryotes	PGSC0003DMT400046148; PGSC0003DMT400077781
	19	Ribosome	7	666	0.0105105	0.724246	ko03010	Genetic Information Processing	Translation	PGSC0003DMT400006512; PGSC0003DMT400035858; PGSC0003DMT400002883; PGSC0003DMT400002881; PGSC0003DMT400002884; PGSC0003DMT400002885; PGSC0003DMT400002882
	20	Carbon fixation in photosynthetic organisms	3	202	0.0148515	0.736479	ko00710	Metabolism	Energy metabolism	PGSC0003DMT400026931; PGSC0003DMT400026930; PGSC0003DMT400026932
