# Supplementary material for: A comparative analysis of small RNA sequencing data in tubers of purple potato and its red mutant reveals small RNA regulation in anthocyanin biosynthesis
Source: PeerJ. 2023 May 19;11:e15349. doi: 10.7717/peerj.15349 (PMC10202107; doi:10.7717/peerj.15349)
Supplement: Table S9 [file peerj-11-15349-s009.xlsx]

## Sheet: Sheet1
	Table S9 Expression of differentially expressed miRNAs and corresponding target genes
	miRNA Expression				miRNA	Target mRNA	Target Gene ID	Gene Expression
	SD92	SD140	SD140/SD92	Regulation				SD92	SD140	SD140/SD92	Regulation
	14.9333	3.09667	0.207366	DOWN	miR156a-5p	PGSC0003DMT400029748	PGSC0003DMG400011433	336.192	306.322	0.91115	DOWN
	14.9333	3.09667	0.207366	DOWN	miR156a-5p	PGSC0003DMT400029749	PGSC0003DMG400011433	336.192	306.322	0.91115	DOWN
	14.9333	3.09667	0.207366	DOWN	miR156a-5p	PGSC0003DMT400029750	PGSC0003DMG400011433	336.192	306.322	0.91115	DOWN
	14.9333	3.09667	0.207366	DOWN	miR156a-5p	PGSC0003DMT400029751	PGSC0003DMG400011433	336.192	306.322	0.91115	DOWN
	14.9333	3.09667	0.207366	DOWN	miR156a-5p	PGSC0003DMT400056372	PGSC0003DMG400021902	16.3521	12.5493	0.76744	DOWN
	14.9333	3.09667	0.207366	DOWN	miR156a-5p	PGSC0003DMT400056373	PGSC0003DMG400021902	16.3521	12.5493	0.76744	DOWN
	14.9333	3.09667	0.207366	DOWN	miR156a-5p	PGSC0003DMT400056374	PGSC0003DMG400021902	16.3521	12.5493	0.76744	DOWN
	14.9333	3.09667	0.207366	DOWN	miR156a-5p	PGSC0003DMT400058753	PGSC0003DMG400022824	1.74731	2.35858	1.34983	UP
	14.9333	3.09667	0.207366	DOWN	miR156a-5p	PGSC0003DMT400059813	PGSC0003DMG400023260	82.395	56.0472	0.680226	DOWN
	14.9333	3.09667	0.207366	DOWN	miR156a-5p	PGSC0003DMT400060830	PGSC0003DMG400023660	39.2399	28.5618	0.727878	DOWN
	14.9333	3.09667	0.207366	DOWN	miR156a-5p	PGSC0003DMT400061560	PGSC0003DMG400023962	3.17185	5.19202	1.6369	UP
	14.9333	3.09667	0.207366	DOWN	miR156a-5p	PGSC0003DMT400063045	PGSC0003DMG400024527	271.959	203.003	0.746447	DOWN
	14.9333	3.09667	0.207366	DOWN	miR156a-5p	PGSC0003DMT400063046	PGSC0003DMG400024527	271.959	203.003	0.746447	DOWN
	14.9333	3.09667	0.207366	DOWN	miR156a-5p	PGSC0003DMT400068752	PGSC0003DMG400026736	11.7285	7.04028	0.600269	DOWN
	14.9333	3.09667	0.207366	DOWN	miR156a-5p	PGSC0003DMT400072745	PGSC0003DMG400028308	110.633	84.9651	0.767989	DOWN
	14.9333	3.09667	0.207366	DOWN	miR156a-5p	PGSC0003DMT400072746	PGSC0003DMG400028308	110.633	84.9651	0.767989	DOWN
	14.9333	3.09667	0.207366	DOWN	miR156a-5p	PGSC0003DMT400074958	PGSC0003DMG400029156	6.38821	7.62137	1.19304	UP
	14.9333	3.09667	0.207366	DOWN	miR156a-5p	PGSC0003DMT400076399	PGSC0003DMG401029709	319.108	149.717	0.469172	DOWN
	14.9333	3.09667	0.207366	DOWN	miR156a-5p	PGSC0003DMT400082789	PGSC0003DMG400032817	3.04571	4.46573	1.46624	UP
	14.9333	3.09667	0.207366	DOWN	miR156a-5p	PGSC0003DMT400082790	PGSC0003DMG400032817	3.04571	4.46573	1.46624	UP
	14.9333	3.09667	0.207366	DOWN	miR156a-5p	PGSC0003DMT400084733	PGSC0003DMG400034310	606.111	639.96	1.05585	UP
	14.9333	3.09667	0.207366	DOWN	miR156a-5p	PGSC0003DMT400084734	PGSC0003DMG400034310	606.111	639.96	1.05585	UP
	10.2767	20.7067	2.01492	UP	miR166d-5p_2	PGSC0003DMT400013987	PGSC0003DMG402005482	6.10924	8.19483	1.34138	UP
	1.31667	14.2103	10.7927	UP	miR171b-3p	PGSC0003DMT400012104	PGSC0003DMG400004752	521.226	568.201	1.09012	UP
	1.31667	14.2103	10.7927	UP	miR171b-3p	PGSC0003DMT400023277	PGSC0003DMG400009015	581.089	545.587	0.938904	DOWN
	1.31667	14.2103	10.7927	UP	miR171b-3p	PGSC0003DMT400031475	PGSC0003DMG400012071	15.1565	26.6098	1.75567	UP
	1.31667	14.2103	10.7927	UP	miR171b-3p	PGSC0003DMT400033037	PGSC0003DMG400012683	120.746	106.12	0.878868	DOWN
	1.31667	14.2103	10.7927	UP	miR171b-3p	PGSC0003DMT400066799	PGSC0003DMG400025973	481.368	619.265	1.28647	UP
	0.0603333	0.19	3.14917	UP	miR171b-3p_2	PGSC0003DMT400012104	PGSC0003DMG400004752	521.226	568.201	1.09012	UP
	0.0603333	0.19	3.14917	UP	miR171b-3p_2	PGSC0003DMT400066799	PGSC0003DMG400025973	481.368	619.265	1.28647	UP
	0.583333	0.014	0.024	DOWN	miR172b	PGSC0003DMT400004461	PGSC0003DMG400001777	688.881	639.665	0.928557	DOWN
	0.583333	0.014	0.024	DOWN	miR172b	PGSC0003DMT400010229	PGSC0003DMG400004006	13.3911	16.8391	1.25749	UP
	0.583333	0.014	0.024	DOWN	miR172b	PGSC0003DMT400010230	PGSC0003DMG400004006	13.3911	16.8391	1.25749	UP
	0.583333	0.014	0.024	DOWN	miR172b	PGSC0003DMT400010231	PGSC0003DMG400004006	13.3911	16.8391	1.25749	UP
	0.583333	0.014	0.024	DOWN	miR172b	PGSC0003DMT400014871	PGSC0003DMG400005807	null	null
	0.583333	0.014	0.024	DOWN	miR172b	PGSC0003DMT400014872	PGSC0003DMG400005807	null	null
	0.583333	0.014	0.024	DOWN	miR172b	PGSC0003DMT400016583	PGSC0003DMG400006482	10.0143	6.56429	0.655491	DOWN
	0.583333	0.014	0.024	DOWN	miR172b	PGSC0003DMT400016584	PGSC0003DMG400006482	10.0143	6.56429	0.655491	DOWN
	0.583333	0.014	0.024	DOWN	miR172b	PGSC0003DMT400016585	PGSC0003DMG400006482	10.0143	6.56429	0.655491	DOWN
	0.583333	0.014	0.024	DOWN	miR172b	PGSC0003DMT400016881	PGSC0003DMG400006604	1.16814	1.38865	1.18877	UP
	0.583333	0.014	0.024	DOWN	miR172b	PGSC0003DMT400016882	PGSC0003DMG400006604	1.16814	1.38865	1.18877	UP
	0.583333	0.014	0.024	DOWN	miR172b	PGSC0003DMT400016883	PGSC0003DMG400006604	1.16814	1.38865	1.18877	UP
	0.583333	0.014	0.024	DOWN	miR172b	PGSC0003DMT400017979	PGSC0003DMG400006988	21.3871	12.2254	0.571627	DOWN
	0.583333	0.014	0.024	DOWN	miR172b	PGSC0003DMT400017980	PGSC0003DMG400006988	21.3871	12.2254	0.571627	DOWN
	0.583333	0.014	0.024	DOWN	miR172b	PGSC0003DMT400017981	PGSC0003DMG400006988	21.3871	12.2254	0.571627	DOWN
	0.583333	0.014	0.024	DOWN	miR172b	PGSC0003DMT400018346	PGSC0003DMG400007126	10.1705	10.1462	0.997609	DOWN
	0.583333	0.014	0.024	DOWN	miR172b	PGSC0003DMT400022987	PGSC0003DMG400008901	14.7095	13.7248	0.933058	DOWN
	0.583333	0.014	0.024	DOWN	miR172b	PGSC0003DMT400028701	PGSC0003DMG400011046	41.2453	42.4313	1.02876	UP
	0.583333	0.014	0.024	DOWN	miR172b	PGSC0003DMT400028702	PGSC0003DMG400011046	41.2453	42.4313	1.02876	UP
	0.583333	0.014	0.024	DOWN	miR172b	PGSC0003DMT400028703	PGSC0003DMG400011046	41.2453	42.4313	1.02876	UP
	0.583333	0.014	0.024	DOWN	miR172b	PGSC0003DMT400028704	PGSC0003DMG400011046	41.2453	42.4313	1.02876	UP
	0.583333	0.014	0.024	DOWN	miR172b	PGSC0003DMT400028705	PGSC0003DMG400011046	41.2453	42.4313	1.02876	UP
	0.583333	0.014	0.024	DOWN	miR172b	PGSC0003DMT400028706	PGSC0003DMG400011046	41.2453	42.4313	1.02876	UP
	0.583333	0.014	0.024	DOWN	miR172b	PGSC0003DMT400031398	PGSC0003DMG400012038	8.9693	10.4183	1.16156	UP
	0.583333	0.014	0.024	DOWN	miR172b	PGSC0003DMT400031399	PGSC0003DMG400012038	8.9693	10.4183	1.16156	UP
	0.583333	0.014	0.024	DOWN	miR172b	PGSC0003DMT400031400	PGSC0003DMG400012038	8.9693	10.4183	1.16156	UP
	0.583333	0.014	0.024	DOWN	miR172b	PGSC0003DMT400031401	PGSC0003DMG400012038	8.9693	10.4183	1.16156	UP
	0.583333	0.014	0.024	DOWN	miR172b	PGSC0003DMT400031402	PGSC0003DMG400012038	8.9693	10.4183	1.16156	UP
	0.583333	0.014	0.024	DOWN	miR172b	PGSC0003DMT400044386	PGSC0003DMG400017234	32.7877	32.693	0.997111	DOWN
	0.583333	0.014	0.024	DOWN	miR172b	PGSC0003DMT400044387	PGSC0003DMG400017234	32.7877	32.693	0.997111	DOWN
	0.583333	0.014	0.024	DOWN	miR172b	PGSC0003DMT400048138	PGSC0003DMG401018705	130.572	71.8922	0.550595	DOWN
	0.583333	0.014	0.024	DOWN	miR172b	PGSC0003DMT400049621	PGSC0003DMG400019276	1.10768	1.06759	0.963809	DOWN
	0.583333	0.014	0.024	DOWN	miR172b	PGSC0003DMT400049622	PGSC0003DMG400019276	1.10768	1.06759	0.963809	DOWN
	0.583333	0.014	0.024	DOWN	miR172b	PGSC0003DMT400049624	PGSC0003DMG400019276	1.10768	1.06759	0.963809	DOWN
	0.583333	0.014	0.024	DOWN	miR172b	PGSC0003DMT400061634	PGSC0003DMG402023991	20.3728	17.1146	0.840074	DOWN
	0.583333	0.014	0.024	DOWN	miR172b	PGSC0003DMT400061635	PGSC0003DMG402023991	20.3728	17.1146	0.840074	DOWN
	0.583333	0.014	0.024	DOWN	miR172b	PGSC0003DMT400065311	PGSC0003DMG400025390	122.007	82.0859	0.672797	DOWN
	0.583333	0.014	0.024	DOWN	miR172b	PGSC0003DMT400065312	PGSC0003DMG400025390	122.007	82.0859	0.672797	DOWN
	0.583333	0.014	0.024	DOWN	miR172b	PGSC0003DMT400065313	PGSC0003DMG400025390	122.007	82.0859	0.672797	DOWN
	0.583333	0.014	0.024	DOWN	miR172b	PGSC0003DMT400065499	PGSC0003DMG400025479	19.0973	19.146	1.00255	UP
	0.583333	0.014	0.024	DOWN	miR172b	PGSC0003DMT400065500	PGSC0003DMG400025479	19.0973	19.146	1.00255	UP
	0.583333	0.014	0.024	DOWN	miR172b	PGSC0003DMT400065501	PGSC0003DMG400025479	19.0973	19.146	1.00255	UP
	0.583333	0.014	0.024	DOWN	miR172b	PGSC0003DMT400065502	PGSC0003DMG400025479	19.0973	19.146	1.00255	UP
	0.583333	0.014	0.024	DOWN	miR172b	PGSC0003DMT400071726	PGSC0003DMG400027904	24.7571	32.6574	1.31911	UP
	0.583333	0.014	0.024	DOWN	miR172b	PGSC0003DMT400071727	PGSC0003DMG400027904	24.7571	32.6574	1.31911	UP
	0.583333	0.014	0.024	DOWN	miR172b	PGSC0003DMT400071728	PGSC0003DMG400027904	24.7571	32.6574	1.31911	UP
	0.583333	0.014	0.024	DOWN	miR172b	PGSC0003DMT400071729	PGSC0003DMG400027904	24.7571	32.6574	1.31911	UP
	0.583333	0.014	0.024	DOWN	miR172b	PGSC0003DMT400071730	PGSC0003DMG400027904	24.7571	32.6574	1.31911	UP
	0.583333	0.014	0.024	DOWN	miR172b	PGSC0003DMT400071731	PGSC0003DMG400027904	24.7571	32.6574	1.31911	UP
	0.583333	0.014	0.024	DOWN	miR172b	PGSC0003DMT400071732	PGSC0003DMG400027904	24.7571	32.6574	1.31911	UP
	0.583333	0.014	0.024	DOWN	miR172b	PGSC0003DMT400071734	PGSC0003DMG400027904	24.7571	32.6574	1.31911	UP
	0.583333	0.014	0.024	DOWN	miR172b	PGSC0003DMT400077340	PGSC0003DMG400030080	8.91236	14.1285	1.58527	UP
	5.77667	1.15667	0.200231	DOWN	miR172e-5p	PGSC0003DMT400002832	PGSC0003DMG400001106	null	null
	5.77667	1.15667	0.200231	DOWN	miR172e-5p	PGSC0003DMT400026930	PGSC0003DMG400010386	186.914	187.212	1.0016	UP
	5.77667	1.15667	0.200231	DOWN	miR172e-5p	PGSC0003DMT400026931	PGSC0003DMG400010386	186.914	187.212	1.0016	UP
	5.77667	1.15667	0.200231	DOWN	miR172e-5p	PGSC0003DMT400026932	PGSC0003DMG400010386	186.914	187.212	1.0016	UP
	5.77667	1.15667	0.200231	DOWN	miR172e-5p	PGSC0003DMT400028154	PGSC0003DMG400010858	null	null
	5.77667	1.15667	0.200231	DOWN	miR172e-5p	PGSC0003DMT400028537	PGSC0003DMG401010991	34.1804	18.3704	0.537455	DOWN
	5.77667	1.15667	0.200231	DOWN	miR172e-5p	PGSC0003DMT400029812	PGSC0003DMG400011457	0.7446	0.852686	1.14516	UP
	5.77667	1.15667	0.200231	DOWN	miR172e-5p	PGSC0003DMT400029865	PGSC0003DMG400011477	272.319	290.163	1.06552	UP
	5.77667	1.15667	0.200231	DOWN	miR172e-5p	PGSC0003DMT400029866	PGSC0003DMG400011477	272.319	290.163	1.06552	UP
	5.77667	1.15667	0.200231	DOWN	miR172e-5p	PGSC0003DMT400029867	PGSC0003DMG400011477	272.319	290.163	1.06552	UP
	5.77667	1.15667	0.200231	DOWN	miR172e-5p	PGSC0003DMT400030279	PGSC0003DMG400011581	281.134	249.707	0.888213	DOWN
	5.77667	1.15667	0.200231	DOWN	miR172e-5p	PGSC0003DMT400030280	PGSC0003DMG400011581	281.134	249.707	0.888213	DOWN
	5.77667	1.15667	0.200231	DOWN	miR172e-5p	PGSC0003DMT400035002	PGSC0003DMG400013458	0.161732	0.147741	0.913491	DOWN
	5.77667	1.15667	0.200231	DOWN	miR172e-5p	PGSC0003DMT400035858	PGSC0003DMG400013806	0.312558	0.267079	0.854493	DOWN
	5.77667	1.15667	0.200231	DOWN	miR172e-5p	PGSC0003DMT400036858	PGSC0003DMG400014214	88.5245	99.9917	1.12954	UP
	5.77667	1.15667	0.200231	DOWN	miR172e-5p	PGSC0003DMT400036859	PGSC0003DMG400014214	88.5245	99.9917	1.12954	UP
	5.77667	1.15667	0.200231	DOWN	miR172e-5p	PGSC0003DMT400036860	PGSC0003DMG400014214	88.5245	99.9917	1.12954	UP
	5.77667	1.15667	0.200231	DOWN	miR172e-5p	PGSC0003DMT400044600	PGSC0003DMG400017311	493.066	451.66	0.916022	DOWN
	5.77667	1.15667	0.200231	DOWN	miR172e-5p	PGSC0003DMT400044601	PGSC0003DMG400017311	493.066	451.66	0.916022	DOWN
	5.77667	1.15667	0.200231	DOWN	miR172e-5p	PGSC0003DMT400046148	PGSC0003DMG400017914	null	null
	5.77667	1.15667	0.200231	DOWN	miR172e-5p	PGSC0003DMT400054200	PGSC0003DMG400021020	1.8024	2.355	1.30659	UP
	5.77667	1.15667	0.200231	DOWN	miR172e-5p	PGSC0003DMT400054201	PGSC0003DMG400021020	1.8024	2.355	1.30659	UP
	5.77667	1.15667	0.200231	DOWN	miR172e-5p	PGSC0003DMT400077781	PGSC0003DMG400030257	null	null
	5.77667	1.15667	0.200231	DOWN	miR172e-5p	PGSC0003DMT400081843	PGSC0003DMG400032135	26.1934	24.4252	0.932496	DOWN
	5.77667	1.15667	0.200231	DOWN	miR172e-5p	PGSC0003DMT400081845	PGSC0003DMG400032135	26.1934	24.4252	0.932496	DOWN
	5.77667	1.15667	0.200231	DOWN	miR172e-5p	PGSC0003DMT400081847	PGSC0003DMG400032135	26.1934	24.4252	0.932496	DOWN
	5.77667	1.15667	0.200231	DOWN	miR172e-5p	PGSC0003DMT400084961	PGSC0003DMG400034532	null	null
	5.77667	1.15667	0.200231	DOWN	miR172e-5p	PGSC0003DMT400086979	PGSC0003DMG400036550	null	null
	5.77667	1.15667	0.200231	DOWN	miR172e-5p	PGSC0003DMT400093231	PGSC0003DMG400042802	null	null
	5.77667	1.15667	0.200231	DOWN	miR172e-5p	PGSC0003DMT400095208	PGSC0003DMG400044779	null	null
	14.71	5.31667	0.361432	DOWN	miR482e-5p	PGSC0003DMT400079092	PGSC0003DMG400030780	13.5906	19.7641	1.45424	UP
	0.183667	0.433333	2.35935	UP	miR530a	PGSC0003DMT400002881	PGSC0003DMG400001126	2.03984	3.77636	1.85131	UP
	0.183667	0.433333	2.35935	UP	miR530a	PGSC0003DMT400002882	PGSC0003DMG400001126	2.03984	3.77636	1.85131	UP
	0.183667	0.433333	2.35935	UP	miR530a	PGSC0003DMT400002883	PGSC0003DMG400001126	2.03984	3.77636	1.85131	UP
	0.183667	0.433333	2.35935	UP	miR530a	PGSC0003DMT400002884	PGSC0003DMG400001126	2.03984	3.77636	1.85131	UP
	0.183667	0.433333	2.35935	UP	miR530a	PGSC0003DMT400002885	PGSC0003DMG400001126	2.03984	3.77636	1.85131	UP
	0.183667	0.433333	2.35935	UP	miR530a	PGSC0003DMT400025984	PGSC0003DMG400010027	32.7556	31.8497	0.972345	DOWN
	0.183667	0.433333	2.35935	UP	miR530a	PGSC0003DMT400057127	PGSC0003DMG400022193	5.0571	3.98657	0.788311	DOWN
	0.183667	0.433333	2.35935	UP	miR530a	PGSC0003DMT400065500	PGSC0003DMG400025479	19.0973	19.146	1.00255	UP
	0.183667	0.433333	2.35935	UP	miR530a	PGSC0003DMT400065501	PGSC0003DMG400025479	19.0973	19.146	1.00255	UP
	0.183667	0.433333	2.35935	UP	miR530a	PGSC0003DMT400065503	PGSC0003DMG400025479	19.0973	19.146	1.00255	UP
	0.183667	0.433333	2.35935	UP	miR530a	PGSC0003DMT400066926	PGSC0003DMG401026018	null	null
	0.183667	0.433333	2.35935	UP	miR530a	PGSC0003DMT400078192	PGSC0003DMG400030421	778.393	758.706	0.974708	DOWN
	0.183667	0.433333	2.35935	UP	miR530a	PGSC0003DMT400078193	PGSC0003DMG400030421	778.393	758.706	0.974708	DOWN
	0.183667	0.433333	2.35935	UP	miR530a	PGSC0003DMT400087008	PGSC0003DMG400036579	null	null
	0.183667	0.433333	2.35935	UP	miR530a	PGSC0003DMT400089244	PGSC0003DMG400038815	null	null
	0.183667	0.433333	2.35935	UP	miR530a	PGSC0003DMT400089289	PGSC0003DMG400038860	2.90416	2.81301	0.968614	DOWN
	13.8867	5.42667	0.390783	DOWN	miR530b_4	PGSC0003DMT400002881	PGSC0003DMG400001126	2.03984	3.77636	1.85131	UP
	13.8867	5.42667	0.390783	DOWN	miR530b_4	PGSC0003DMT400002882	PGSC0003DMG400001126	2.03984	3.77636	1.85131	UP
	13.8867	5.42667	0.390783	DOWN	miR530b_4	PGSC0003DMT400002883	PGSC0003DMG400001126	2.03984	3.77636	1.85131	UP
	13.8867	5.42667	0.390783	DOWN	miR530b_4	PGSC0003DMT400002884	PGSC0003DMG400001126	2.03984	3.77636	1.85131	UP
	13.8867	5.42667	0.390783	DOWN	miR530b_4	PGSC0003DMT400002885	PGSC0003DMG400001126	2.03984	3.77636	1.85131	UP
	13.8867	5.42667	0.390783	DOWN	miR530b_4	PGSC0003DMT400005374	PGSC0003DMG400002097	null	null
	13.8867	5.42667	0.390783	DOWN	miR530b_4	PGSC0003DMT400057127	PGSC0003DMG400022193	5.0571	3.98657	0.788311	DOWN
	13.8867	5.42667	0.390783	DOWN	miR530b_4	PGSC0003DMT400065500	PGSC0003DMG400025479	19.0973	19.146	1.00255	UP
	13.8867	5.42667	0.390783	DOWN	miR530b_4	PGSC0003DMT400065501	PGSC0003DMG400025479	19.0973	19.146	1.00255	UP
	13.8867	5.42667	0.390783	DOWN	miR530b_4	PGSC0003DMT400065503	PGSC0003DMG400025479	19.0973	19.146	1.00255	UP
	13.8867	5.42667	0.390783	DOWN	miR530b_4	PGSC0003DMT400066926	PGSC0003DMG401026018	null	null
	13.8867	5.42667	0.390783	DOWN	miR530b_4	PGSC0003DMT400078574	PGSC0003DMG400030587	22.1833	31.6232	1.42554	UP
	7.84333	15.7367	2.00637	UP	miR8030-5p	PGSC0003DMT400006966	PGSC0003DMG401002698	null	null
	7.84333	15.7367	2.00637	UP	miR8030-5p	PGSC0003DMT400006967	PGSC0003DMG401002698	null	null
	7.84333	15.7367	2.00637	UP	miR8036-5p	PGSC0003DMT400074536	PGSC0003DMG401028974	40.417	62.0261	1.53466	UP
	7.84333	15.7367	2.00637	UP	miR8036-5p	PGSC0003DMT400074537	PGSC0003DMG401028974	40.417	62.0261	1.53466	UP
	7.84333	15.7367	2.00637	UP	miR8036-5p	PGSC0003DMT400074538	PGSC0003DMG401028974	40.417	62.0261	1.53466	UP
	7.84333	15.7367	2.00637	UP	miR8036-5p	PGSC0003DMT400074539	PGSC0003DMG401028974	40.417	62.0261	1.53466	UP
	7.84333	15.7367	2.00637	UP	miR8036-5p	PGSC0003DMT400076108	PGSC0003DMG403029595	19.2236	21.2479	1.10531	UP
	7.84333	15.7367	2.00637	UP	miR8036-5p	PGSC0003DMT400076109	PGSC0003DMG403029595	19.2236	21.2479	1.10531	UP
	0.001	0.164	164	UP	novel_mir105	PGSC0003DMT400019164	PGSC0003DMG402007414	92.7836	36.5163	0.393564	DOWN
	0.001	0.164	164	UP	novel_mir105	PGSC0003DMT400019165	PGSC0003DMG402007414	92.7836	36.5163	0.393564	DOWN
	46.4567	17.08	0.367654	DOWN	novel_mir106	PGSC0003DMT400095354	PGSC0003DMG400044925	null	null
	46.4567	17.08	0.367654	DOWN	novel_mir106	PGSC0003DMT400097068	PGSC0003DMG400046639	0.500838	0.466102	0.930643	DOWN
	8.50667	3.21333	0.377743	DOWN	novel_mir117	PGSC0003DMT400034892	PGSC0003DMG400013411	0.481835	0.38762	0.804466	DOWN
	8.50667	3.21333	0.377743	DOWN	novel_mir117	PGSC0003DMT400042521	PGSC0003DMG400016493	1.07881	0.554279	0.513787	DOWN
	8.50667	3.21333	0.377743	DOWN	novel_mir117	PGSC0003DMT400042522	PGSC0003DMG400016493	1.07881	0.554279	0.513787	DOWN
	8.50667	3.21333	0.377743	DOWN	novel_mir117	PGSC0003DMT400053189	PGSC0003DMG400020645	50.847	73.0813	1.43728	UP
	8.50667	3.21333	0.377743	DOWN	novel_mir117	PGSC0003DMT400067828	PGSC0003DMG400026383	1.4891	2.18063	1.46439	UP
	8.50667	3.21333	0.377743	DOWN	novel_mir117	PGSC0003DMT400078029	PGSC0003DMG400030348	281.642	225.837	0.801858	DOWN
	8.50667	3.21333	0.377743	DOWN	novel_mir117	PGSC0003DMT400079093	PGSC0003DMG400030780	13.5906	19.7641	1.45424	UP
	8.50667	3.21333	0.377743	DOWN	novel_mir117	PGSC0003DMT400080077	PGSC0003DMG400031180	8.55512	16.0694	1.87833	UP
	8.50667	3.21333	0.377743	DOWN	novel_mir117	PGSC0003DMT400081915	PGSC0003DMG401032158	null	null
	8.50667	3.21333	0.377743	DOWN	novel_mir117	PGSC0003DMT400094328	PGSC0003DMG400043899	0.857651	0.548136	0.639113	DOWN
	74.4767	152.383	2.04605	UP	novel_mir128	PGSC0003DMT400084794	PGSC0003DMG400034365	null	null
	74.4767	152.383	2.04605	UP	novel_mir128	PGSC0003DMT400085053	PGSC0003DMG400034624	4.6725	8.2595	1.76768	UP
	74.4767	152.383	2.04605	UP	novel_mir128	PGSC0003DMT400085062	PGSC0003DMG400034633	0.46879	0.437509	0.933272	DOWN
	74.4767	152.383	2.04605	UP	novel_mir128	PGSC0003DMT400085242	PGSC0003DMG400034813	null	null
	74.4767	152.383	2.04605	UP	novel_mir128	PGSC0003DMT400085263	PGSC0003DMG400034834	0.521376	0.827934	1.58798	UP
	74.4767	152.383	2.04605	UP	novel_mir128	PGSC0003DMT400085796	PGSC0003DMG400035367	0.585264	0.745212	1.27329	UP
	74.4767	152.383	2.04605	UP	novel_mir128	PGSC0003DMT400085947	PGSC0003DMG400035518	0.838287	1.24967	1.49075	UP
	74.4767	152.383	2.04605	UP	novel_mir128	PGSC0003DMT400086941	PGSC0003DMG400036512	null	null
	74.4767	152.383	2.04605	UP	novel_mir128	PGSC0003DMT400087495	PGSC0003DMG400037066	null	null
	74.4767	152.383	2.04605	UP	novel_mir128	PGSC0003DMT400087886	PGSC0003DMG400037457	0.407246	0.336734	0.826857	DOWN
	74.4767	152.383	2.04605	UP	novel_mir128	PGSC0003DMT400089110	PGSC0003DMG400038681	269.447	312.445	1.15958	UP
	74.4767	152.383	2.04605	UP	novel_mir128	PGSC0003DMT400089203	PGSC0003DMG400038774	0.854056	0.927257	1.08571	UP
	74.4767	152.383	2.04605	UP	novel_mir128	PGSC0003DMT400089746	PGSC0003DMG400039317	18.6822	19.2268	1.02915	UP
	74.4767	152.383	2.04605	UP	novel_mir128	PGSC0003DMT400091502	PGSC0003DMG400041073	null	null
	74.4767	152.383	2.04605	UP	novel_mir128	PGSC0003DMT400091537	PGSC0003DMG400041108	null	null
	74.4767	152.383	2.04605	UP	novel_mir128	PGSC0003DMT400092947	PGSC0003DMG400042518	null	null
	74.4767	152.383	2.04605	UP	novel_mir128	PGSC0003DMT400093136	PGSC0003DMG400042707	null	null
	74.4767	152.383	2.04605	UP	novel_mir128	PGSC0003DMT400094279	PGSC0003DMG400043850	7319.83	5211.74	0.712003	DOWN
	74.4767	152.383	2.04605	UP	novel_mir128	PGSC0003DMT400094579	PGSC0003DMG400044150	null	null
	74.4767	152.383	2.04605	UP	novel_mir128	PGSC0003DMT400096440	PGSC0003DMG400046011	null	null
	74.4767	152.383	2.04605	UP	novel_mir128	PGSC0003DMT400096779	PGSC0003DMG400046350	null	null
	74.4767	152.383	2.04605	UP	novel_mir128	PGSC0003DMT400097443	PGSC0003DMG400047014	1.49328	1.80295	1.20737	UP
	4.74	0.001	0.00021097	DOWN	novel_mir135	PGSC0003DMT400012791	PGSC0003DMG400004984	112.23	107.972	0.962059	DOWN
	4.74	0.001	0.00021097	DOWN	novel_mir135	PGSC0003DMT400012792	PGSC0003DMG400004984	112.23	107.972	0.962059	DOWN
	4.74	0.001	0.00021097	DOWN	novel_mir135	PGSC0003DMT400012793	PGSC0003DMG400004984	112.23	107.972	0.962059	DOWN
	12.19	1.57667	0.129341	DOWN	novel_mir136	PGSC0003DMT400053002	PGSC0003DMG400020567	10.7227	9.30649	0.867928	DOWN
	5.73	0.297	0.0518325	DOWN	novel_mir137	PGSC0003DMT400016564	PGSC0003DMG400006470	null	null
	5.73	0.297	0.0518325	DOWN	novel_mir137	PGSC0003DMT400083809	PGSC0003DMG400033607	24.0566	19.9781	0.830461	DOWN
	1.87067	68.1167	36.413	UP	novel_mir143	PGSC0003DMT400019164	PGSC0003DMG402007414	92.7836	36.5163	0.393564	DOWN
	1.87067	68.1167	36.413	UP	novel_mir143	PGSC0003DMT400019165	PGSC0003DMG402007414	92.7836	36.5163	0.393564	DOWN
	42.0067	2.63033	0.062617	DOWN	novel_mir149	PGSC0003DMT400065792	PGSC0003DMG400025611	92.4478	54.0253	0.584387	DOWN
	42.0067	2.63033	0.062617	DOWN	novel_mir149	PGSC0003DMT400080386	PGSC0003DMG402031302	115.061	111.436	0.968489	DOWN
	4.81333	0.140667	0.0292244	DOWN	novel_mir170	PGSC0003DMT400001378	PGSC0003DMG400000513	2.42139	3.15112	1.30137	UP
	4.81333	0.140667	0.0292244	DOWN	novel_mir170	PGSC0003DMT400003907	PGSC0003DMG400001543	17.7742	11.0672	0.622655	DOWN
	4.81333	0.140667	0.0292244	DOWN	novel_mir170	PGSC0003DMT400006512	PGSC0003DMG400002541	786.589	1155.31	1.46876	UP
	4.81333	0.140667	0.0292244	DOWN	novel_mir170	PGSC0003DMT400012314	PGSC0003DMG400004825	3.47188	2.14653	0.618262	DOWN
	4.81333	0.140667	0.0292244	DOWN	novel_mir170	PGSC0003DMT400012316	PGSC0003DMG400004826	1.31126	1.65765	1.26417	UP
	4.81333	0.140667	0.0292244	DOWN	novel_mir170	PGSC0003DMT400012317	PGSC0003DMG400004826	1.31126	1.65765	1.26417	UP
	4.81333	0.140667	0.0292244	DOWN	novel_mir170	PGSC0003DMT400016873	PGSC0003DMG402006600	22.4745	20.7495	0.923248	DOWN
	4.81333	0.140667	0.0292244	DOWN	novel_mir170	PGSC0003DMT400018447	PGSC0003DMG400007157	1.15139	1.08285	0.940475	DOWN
	4.81333	0.140667	0.0292244	DOWN	novel_mir170	PGSC0003DMT400018521	PGSC0003DMG400007189	342.75	360.367	1.0514	UP
	4.81333	0.140667	0.0292244	DOWN	novel_mir170	PGSC0003DMT400018522	PGSC0003DMG400007189	342.75	360.367	1.0514	UP
	4.81333	0.140667	0.0292244	DOWN	novel_mir170	PGSC0003DMT400021730	PGSC0003DMG400008432	155.841	183.39	1.17677	UP
	4.81333	0.140667	0.0292244	DOWN	novel_mir170	PGSC0003DMT400021731	PGSC0003DMG400008432	155.841	183.39	1.17677	UP
	4.81333	0.140667	0.0292244	DOWN	novel_mir170	PGSC0003DMT400022141	PGSC0003DMG400008591	3.45359	3.37499	0.977241	DOWN
	4.81333	0.140667	0.0292244	DOWN	novel_mir170	PGSC0003DMT400022142	PGSC0003DMG400008591	3.45359	3.37499	0.977241	DOWN
	4.81333	0.140667	0.0292244	DOWN	novel_mir170	PGSC0003DMT400022145	PGSC0003DMG400008591	3.45359	3.37499	0.977241	DOWN
	4.81333	0.140667	0.0292244	DOWN	novel_mir170	PGSC0003DMT400022146	PGSC0003DMG400008591	3.45359	3.37499	0.977241	DOWN
	4.81333	0.140667	0.0292244	DOWN	novel_mir170	PGSC0003DMT400024907	PGSC0003DMG400009627	1.94603	1.44872	0.744449	DOWN
	4.81333	0.140667	0.0292244	DOWN	novel_mir170	PGSC0003DMT400031693	PGSC0003DMG400012159	5.7512	6.24978	1.08669	UP
	4.81333	0.140667	0.0292244	DOWN	novel_mir170	PGSC0003DMT400031694	PGSC0003DMG400012159	5.7512	6.24978	1.08669	UP
	4.81333	0.140667	0.0292244	DOWN	novel_mir170	PGSC0003DMT400038732	PGSC0003DMG400014970	84.9988	56.502	0.664739	DOWN
	4.81333	0.140667	0.0292244	DOWN	novel_mir170	PGSC0003DMT400038733	PGSC0003DMG400014970	84.9988	56.502	0.664739	DOWN
	4.81333	0.140667	0.0292244	DOWN	novel_mir170	PGSC0003DMT400038734	PGSC0003DMG400014970	84.9988	56.502	0.664739	DOWN
	4.81333	0.140667	0.0292244	DOWN	novel_mir170	PGSC0003DMT400038735	PGSC0003DMG400014970	84.9988	56.502	0.664739	DOWN
	4.81333	0.140667	0.0292244	DOWN	novel_mir170	PGSC0003DMT400047076	PGSC0003DMG400018279	4.40333	7.9759	1.81133	UP
	4.81333	0.140667	0.0292244	DOWN	novel_mir170	PGSC0003DMT400048434	PGSC0003DMG400018811	87.2951	94.7604	1.08552	UP
	4.81333	0.140667	0.0292244	DOWN	novel_mir170	PGSC0003DMT400048435	PGSC0003DMG400018811	87.2951	94.7604	1.08552	UP
	4.81333	0.140667	0.0292244	DOWN	novel_mir170	PGSC0003DMT400049658	PGSC0003DMG400019290	47.3726	38.1471	0.805257	DOWN
	4.81333	0.140667	0.0292244	DOWN	novel_mir170	PGSC0003DMT400059321	PGSC0003DMG400023049	114.842	86.4564	0.752828	DOWN
	4.81333	0.140667	0.0292244	DOWN	novel_mir170	PGSC0003DMT400059322	PGSC0003DMG400023049	114.842	86.4564	0.752828	DOWN
	4.81333	0.140667	0.0292244	DOWN	novel_mir170	PGSC0003DMT400059323	PGSC0003DMG400023049	114.842	86.4564	0.752828	DOWN
	4.81333	0.140667	0.0292244	DOWN	novel_mir170	PGSC0003DMT400063787	PGSC0003DMG400024795	5.37472	7.87553	1.46529	UP
	4.81333	0.140667	0.0292244	DOWN	novel_mir170	PGSC0003DMT400084315	PGSC0003DMG400033933	18.7577	18.9983	1.01283	UP
	4.81333	0.140667	0.0292244	DOWN	novel_mir170	PGSC0003DMT400085709	PGSC0003DMG400035280	null	null
	4.81333	0.140667	0.0292244	DOWN	novel_mir170	PGSC0003DMT400087143	PGSC0003DMG400036714	null	null
	4.81333	0.140667	0.0292244	DOWN	novel_mir170	PGSC0003DMT400088247	PGSC0003DMG400037818	null	null
	4.81333	0.140667	0.0292244	DOWN	novel_mir170	PGSC0003DMT400088613	PGSC0003DMG400038184	null	null
	4.81333	0.140667	0.0292244	DOWN	novel_mir170	PGSC0003DMT400089728	PGSC0003DMG400039299	null	null
	4.81333	0.140667	0.0292244	DOWN	novel_mir170	PGSC0003DMT400091337	PGSC0003DMG400040908	null	null
	4.81333	0.140667	0.0292244	DOWN	novel_mir170	PGSC0003DMT400091431	PGSC0003DMG400041002	null	null
	4.81333	0.140667	0.0292244	DOWN	novel_mir170	PGSC0003DMT400097518	PGSC0003DMG400047089	null	null
	5.38333	0.001	0.000185759	DOWN	novel_mir32	PGSC0003DMT400045298	PGSC0003DMG400017569	3128.2	5980.79	1.91189	UP
	5.38333	0.001	0.000185759	DOWN	novel_mir32	PGSC0003DMT400008838	PGSC0003DMG400003436	91.7106	97.721	1.06554	UP
	5.38333	0.001	0.000185759	DOWN	novel_mir32	PGSC0003DMT400008840	PGSC0003DMG400003436	91.7106	97.721	1.06554	UP
	5.38333	0.001	0.000185759	DOWN	novel_mir32	PGSC0003DMT400008841	PGSC0003DMG400003436	91.7106	97.721	1.06554	UP
	5.38333	0.001	0.000185759	DOWN	novel_mir32	PGSC0003DMT400008842	PGSC0003DMG400003436	91.7106	97.721	1.06554	UP
	5.38333	0.001	0.000185759	DOWN	novel_mir32	PGSC0003DMT400008843	PGSC0003DMG400003436	91.7106	97.721	1.06554	UP
	5.38333	0.001	0.000185759	DOWN	novel_mir32	PGSC0003DMT400008844	PGSC0003DMG400003436	91.7106	97.721	1.06554	UP
	5.38333	0.001	0.000185759	DOWN	novel_mir32	PGSC0003DMT400008845	PGSC0003DMG400003436	91.7106	97.721	1.06554	UP
	5.38333	0.001	0.000185759	DOWN	novel_mir32	PGSC0003DMT400008846	PGSC0003DMG400003436	91.7106	97.721	1.06554	UP
	5.38333	0.001	0.000185759	DOWN	novel_mir32	PGSC0003DMT400018517	PGSC0003DMG400007187	128.469	133.144	1.03639	UP
	5.38333	0.001	0.000185759	DOWN	novel_mir32	PGSC0003DMT400020118	PGSC0003DMG400007793	0.486743	0.43921	0.902345	DOWN
	5.38333	0.001	0.000185759	DOWN	novel_mir32	PGSC0003DMT400023384	PGSC0003DMG400009055	0.467391	0.518414	1.10917	UP
	5.38333	0.001	0.000185759	DOWN	novel_mir32	PGSC0003DMT400028878	PGSC0003DMG400011113	0.456423	0.526059	1.15257	UP
	5.38333	0.001	0.000185759	DOWN	novel_mir32	PGSC0003DMT400033517	PGSC0003DMG400012875	2628.16	4864.65	1.85097	UP
	5.38333	0.001	0.000185759	DOWN	novel_mir32	PGSC0003DMT400036860	PGSC0003DMG400014214	88.5245	99.9917	1.12954	UP
	5.38333	0.001	0.000185759	DOWN	novel_mir32	PGSC0003DMT400042984	PGSC0003DMG400016669	138.922	133.28	0.959386	DOWN
	5.38333	0.001	0.000185759	DOWN	novel_mir32	PGSC0003DMT400042986	PGSC0003DMG400016669	138.922	133.28	0.959386	DOWN
	5.38333	0.001	0.000185759	DOWN	novel_mir32	PGSC0003DMT400043273	PGSC0003DMG400016798	166.688	282.961	1.69755	UP
	5.38333	0.001	0.000185759	DOWN	novel_mir32	PGSC0003DMT400045299	PGSC0003DMG400017569	3128.2	5980.79	1.91189	UP
	5.38333	0.001	0.000185759	DOWN	novel_mir32	PGSC0003DMT400070230	PGSC0003DMG400027301	0.298131	0.355192	1.1914	UP
	5.38333	0.001	0.000185759	DOWN	novel_mir32	PGSC0003DMT400081909	PGSC0003DMG400032155	2.39364	4.86724	2.0334	UP
	5.38333	0.001	0.000185759	DOWN	novel_mir32	PGSC0003DMT400081911	PGSC0003DMG400032155	2.39364	4.86724	2.0334	UP
	5.38333	0.001	0.000185759	DOWN	novel_mir32	PGSC0003DMT400088998	PGSC0003DMG400038569	1.73368	1.08786	0.627487	DOWN
	5.38333	0.001	0.000185759	DOWN	novel_mir32	PGSC0003DMT400091480	PGSC0003DMG400041051	2.20184	1.44319	0.655446	DOWN
	5.38333	0.001	0.000185759	DOWN	novel_mir32	PGSC0003DMT400094117	PGSC0003DMG400043688	0.480541	0.865446	1.80098	UP
	8.93667	0.140667	0.0157404	DOWN	novel_mir42	PGSC0003DMT400022983	PGSC0003DMG400008897	1.09804	1.36457	1.24274	UP
	8.93667	0.140667	0.0157404	DOWN	novel_mir42	PGSC0003DMT400049168	PGSC0003DMG400019112	null	null
	8.93667	0.140667	0.0157404	DOWN	novel_mir42	PGSC0003DMT400049169	PGSC0003DMG400019112	null	null
	5.61667	0.130667	0.0232641	DOWN	novel_mir53	PGSC0003DMT400070583	PGSC0003DMG400027434	177.772	162.799	0.915777	DOWN
	5.61667	0.130667	0.0232641	DOWN	novel_mir53	PGSC0003DMT400070584	PGSC0003DMG400027434	177.772	162.799	0.915777	DOWN
	68.2733	290.963	4.26174	UP	novel_mir54	PGSC0003DMT400081781	PGSC0003DMG400032120	123.62	94.343	0.763167	DOWN
	2.34	9.26667	3.96011	UP	novel_mir61	PGSC0003DMT400005770	PGSC0003DMG400002256	null	null
	2.34	9.26667	3.96011	UP	novel_mir61	PGSC0003DMT400010966	PGSC0003DMG400004295	57.3621	60.2063	1.04958	UP
	2.34	9.26667	3.96011	UP	novel_mir61	PGSC0003DMT400010970	PGSC0003DMG400004296	16.3811	14.7857	0.902608	DOWN
	2.34	9.26667	3.96011	UP	novel_mir61	PGSC0003DMT400010987	PGSC0003DMG400004303	2.61035	5.14301	1.97024	UP
	2.34	9.26667	3.96011	UP	novel_mir61	PGSC0003DMT400012121	PGSC0003DMG400004756	14.1117	9.37509	0.664351	DOWN
	2.34	9.26667	3.96011	UP	novel_mir61	PGSC0003DMT400020342	PGSC0003DMG400007867	115.375	82.3534	0.713792	DOWN
	2.34	9.26667	3.96011	UP	novel_mir61	PGSC0003DMT400020349	PGSC0003DMG400007870	59.5034	35.7009	0.59998	DOWN
	2.34	9.26667	3.96011	UP	novel_mir61	PGSC0003DMT400020353	PGSC0003DMG402007871	205.121	188.225	0.917629	DOWN
	2.34	9.26667	3.96011	UP	novel_mir61	PGSC0003DMT400020354	PGSC0003DMG402007871	205.121	188.225	0.917629	DOWN
	2.34	9.26667	3.96011	UP	novel_mir61	PGSC0003DMT400020355	PGSC0003DMG401007871	67.6815	76.8853	1.13599	UP
	2.34	9.26667	3.96011	UP	novel_mir61	PGSC0003DMT400020356	PGSC0003DMG401007871	67.6815	76.8853	1.13599	UP
	2.34	9.26667	3.96011	UP	novel_mir61	PGSC0003DMT400020357	PGSC0003DMG401007871	67.6815	76.8853	1.13599	UP
	2.34	9.26667	3.96011	UP	novel_mir61	PGSC0003DMT400020359	PGSC0003DMG400007872	17.7196	10.3014	0.581356	DOWN
	2.34	9.26667	3.96011	UP	novel_mir61	PGSC0003DMT400020360	PGSC0003DMG400007872	17.7196	10.3014	0.581356	DOWN
	2.34	9.26667	3.96011	UP	novel_mir61	PGSC0003DMT400036058	PGSC0003DMG400013889	93.9592	94.3166	1.0038	UP
	2.34	9.26667	3.96011	UP	novel_mir61	PGSC0003DMT400062366	PGSC0003DMG400024273	1.34129	1.77547	1.3237	UP
	2.34	9.26667	3.96011	UP	novel_mir61	PGSC0003DMT400071638	PGSC0003DMG400027867	28.0678	64.5738	2.30063	UP
	2.34	9.26667	3.96011	UP	novel_mir61	PGSC0003DMT400080261	PGSC0003DMG400031244	189.578	148.848	0.785154	DOWN
	2.34	9.26667	3.96011	UP	novel_mir61	PGSC0003DMT400087433	PGSC0003DMG400037004	null	null
	11.23	0.354	0.0315227	DOWN	novel_mir67	PGSC0003DMT400022066	PGSC0003DMG400008560	12.802	13.7467	1.07379	UP
	11.23	0.354	0.0315227	DOWN	novel_mir67	PGSC0003DMT400043940	PGSC0003DMG400017053	26.8198	29.1104	1.08541	UP
	11.23	0.354	0.0315227	DOWN	novel_mir67	PGSC0003DMT400078485	PGSC0003DMG400030551	55.3906	76.0637	1.37323	UP
	3.39	9.31333	2.7473	UP	novel_mir75	PGSC0003DMT400009919	PGSC0003DMG400003887	1524.61	1060.12	0.695334	DOWN
	3.39	9.31333	2.7473	UP	novel_mir75	PGSC0003DMT400025179	PGSC0003DMG400009731	1.04143	0.548799	0.526967	DOWN
	3.39	9.31333	2.7473	UP	novel_mir75	PGSC0003DMT400044602	PGSC0003DMG400017312	20.4521	18.8171	0.920055	DOWN
	3.39	9.31333	2.7473	UP	novel_mir75	PGSC0003DMT400044603	PGSC0003DMG400017312	20.4521	18.8171	0.920055	DOWN
	3.39	9.31333	2.7473	UP	novel_mir75	PGSC0003DMT400066815	PGSC0003DMG400025978	4.75415	3.5449	0.745644	DOWN
	42.93	19.3033	0.449647	DOWN	novel_mir78	PGSC0003DMT400002032	PGSC0003DMG400000774	96.9009	109.758	1.13268	UP
	42.93	19.3033	0.449647	DOWN	novel_mir78	PGSC0003DMT400059106	PGSC0003DMG400022958	null	null
	42.93	19.3033	0.449647	DOWN	novel_mir78	PGSC0003DMT400074918	PGSC0003DMG400029137	null	null
	82.77	37.6733	0.455157	DOWN	novel_mir84	PGSC0003DMT400013500	PGSC0003DMG400005269	17050.3	14030.4	0.822882	DOWN
	7.41	0.154	0.0207827	DOWN	novel_mir89	PGSC0003DMT400017880	PGSC0003DMG400006945	113.908	137.273	1.20512	UP
	7.41	0.154	0.0207827	DOWN	novel_mir89	PGSC0003DMT400017881	PGSC0003DMG400006945	113.908	137.273	1.20512	UP
	7.41	0.154	0.0207827	DOWN	novel_mir89	PGSC0003DMT400017882	PGSC0003DMG400006945	113.908	137.273	1.20512	UP
	7.41	0.154	0.0207827	DOWN	novel_mir89	PGSC0003DMT400017883	PGSC0003DMG400006945	113.908	137.273	1.20512	UP
	7.41	0.154	0.0207827	DOWN	novel_mir89	PGSC0003DMT400017884	PGSC0003DMG400006945	113.908	137.273	1.20512	UP
	7.41	0.154	0.0207827	DOWN	novel_mir89	PGSC0003DMT400017885	PGSC0003DMG400006945	113.908	137.273	1.20512	UP
	7.41	0.154	0.0207827	DOWN	novel_mir89	PGSC0003DMT400017886	PGSC0003DMG400006945	113.908	137.273	1.20512	UP
	7.41	0.154	0.0207827	DOWN	novel_mir89	PGSC0003DMT400017887	PGSC0003DMG400006945	113.908	137.273	1.20512	UP
