# Supplementary material for: A comparative analysis of small RNA sequencing data in tubers of purple potato and its red mutant reveals small RNA regulation in anthocyanin biosynthesis
Source: PeerJ. 2023 May 19;11:e15349. doi: 10.7717/peerj.15349 (PMC10202107; doi:10.7717/peerj.15349)
Supplement: Table S10 [file peerj-11-15349-s010.xlsx]

## Sheet: Sheet1
	Table S10 Ct values of miRNAs in RT-qPCR
		SD92			SD140-1
		Replicate 1	Replicate 2	Replicate 3	Replicate 1	Replicate 2	Replicate 3
	18S RNA	11.5965	11.2098	11.4304	10.9999	10.8529	11.7183
		11.5497	11.1879	11.2326	10.8235	10.8684	11.6625
	miR172b	21.3408	20.6907	21.0824	21.0935	21.2772	21.922
		21.5039	20.4716	21.0656	21.2831	21.491	21.7547
	18S RNA	12.5972	12.2109	12.3384	11.9167	12.4522	12.8764
		12.4536	11.9678	12.4361	12.0539	12.6069	12.7347
	novel_mir143	26.6444	26.6623	26.4272	25.9841	26.0568	26.2299
		26.6955	26.4609	26.6629	26.177	26.1946	26.3426
	novel_mir105	26.2536	26.3423	26.4278	25.8051	26.0363	26.1596
		26.1952	26.5124	26.4994	25.9985	26.1727	26.1103
	miR166a-3p	23.1447	22.3028	22.2626	22.0142	22.1069	21.7985
		23.3481	22.2614	23.1935	22.0392	22.2486	22.6028
	miR171b-3p	30.9205	30.4673	30.6093	30.1994	29.4214	30.4802
		31.0617	30.5327	30.8007	30.1921	29.6023	30.2748
	18S RNA	11.7663	12.0054	11.5668	11.2286	12.1074	11.9931
		11.9411	11.8089	11.5897	11.4378	12.0357	12.0488
	miR166d-5p_2	23.2401	23.8529	23.8182	22.805	23.2206	22.6338
		23.221	23.7199	23.8024	22.9864	23.4762	22.7436
	m530a	20.0521	20.4818	20.74	19.6669	20.2775	20.0159
		20.309	20.5625	20.4783	19.828	20.3183	20.2148
	m171b-3p_2	27.8954	27.9441	27.7858	27.3947	28.1435	27.2142
		28.0906	27.7504	27.6265	27.3652	27.9314	27.3847
	m399a_6	18.6143	19.1404	19.0613	19.5535	20.0638	19.2673
		18.8719	19.3486	19.3219	19.832	20.2578	19.3544
	m399i	19.09	19.3888	19.4189	19.9908	20.6142	20.0814
		19.0363	19.5879	19.2033	20.1855	20.751	20.0106
	m399j_2	18.0039	18.7047	18.1919	19.4947	19.6658	19.3636
		18.2123	18.9296	18.1688	19.5627	19.7333	19.4739
	18S RNA	12.9065	12.6583	12.1818	11.9755	12.6894	12.9675
		12.7096	12.5361	12.0597	12.0301	12.7577	13.0534
	miR172e-5p	20.7994	20.5595	20.8143	20.8824	20.9423	22.1973
		20.9019	20.7275	20.7654	21.0253	21.1529	22.3755
	18S RNA	16.0014	16.0771	15.1597	14.4994	14.6998	15.1876
		15.8711	15.8186	15.0344	14.4251	14.6489	15.214
	novel_mir32	22.1919	21.7712	21.7889	21.5878	22.0749	22.723
		22.1421	21.9611	21.8242	21.7482	22.267	22.8813
	miR156a-5p	22.6806	22.2966	21.9716	21.5846	21.868	22.7273
		22.722	22.4465	22.0774	21.7414	22.0954	22.9205
	18S RNA	15.1666	14.7389	13.9818	13.3417	13.3019	14.1606
		15.0391	14.6062	13.8372	13.3255	13.1171	14.0515
	novel_mir170	21.1506	20.8159	20.5587	19.9677	20.4799	21.4006
		21.0172	20.9795	20.4085	20.1138	20.4561	21.6353
	miR828a_1	29.5618	28.8098	27.6091	26.9043	27.0006	28.1334
		28.4232	28.8843	27.8256	26.9083	26.7992	28.0391
